# Supplementary material
Source: PubMed Central journal article supplement (PMC8087558)
Supplement: 11481_2021_9982_MOESM1_ESM.pdf [file 11481_2021_9982_MOESM1_ESM.pdf]

**Supplementary Table S1.** References retrieved on PubMed, Scopus, Web of Science.

| Ref # | Citation                                                                                                                                                                                                                                                                                                                                                                                             | Database                           | Decision                               |
|-------|------------------------------------------------------------------------------------------------------------------------------------------------------------------------------------------------------------------------------------------------------------------------------------------------------------------------------------------------------------------------------------------------------|------------------------------------|----------------------------------------|
| 1.    | A breakthrough for the treatment of spasticity in multiple sclerosis<br>Lebrun C, Vermersch P.,"Rev Neurol (Paris). 2015<br>171(4):327-8. doi: 10.1016/j.neurol.2015.03.002.                                                                                                                                                                                                                         | PubMed<br>Scopus                   | Discard<br>Reasons:<br>Not of interest |
| 2.    | A brief history of cannabinoid and endocannabinoid pharmacology as inspired by the work of British scientists.<br>Di Marzo V.<br>Trends in Pharmacological Sciences. 2006<br>27(3):134-140. doi:10.1016/j.tips.2006.01.010                                                                                                                                                                           | Scopus                             | Discard<br>Reasons:<br>Not of interest |
| 3.    | A Cannabigerol Quinone Alleviates Neuroinflammation in a Chronic Model of Multiple Sclerosis.<br>Granja AG, Carrillo-Salinas F, Pagani A, Gomez-Canas M, Negri R, Navarrete C, Mecha M, Mestre L, Fiebich, BL, Cantarero I, Calzado, MA, Bellido ML, Fernandez-Ruiz J, Appendino G, Guaza C, Munoz E.<br>JOURNAL OF NEUROIMMUNE PHARMACOLOGY. 2012<br>7(4):1002-1016. doi: 10.1007/s11481-012-9399-3 | Pubmed<br>Scopus<br>Web of Science | Discard<br>Reasons:<br>Not of interest |
| 4.    | A cost-effectiveness model for the use of a cannabis-derived oromucosal spray for the treatment of spasticity in multiple sclerosis<br>Gras A, Broughton J.<br>Expert Rev Pharmacoecon Outcomes Res. 2016<br>16(6):771-779 doi:10.1586/14737167.2016.1140574                                                                                                                                         | Pubmed<br>Scopus<br>Web of Science | Discard<br>Reasons:<br>Not of interest |
| 5.    | A Cross-Sectional Study of the Impact of Spasticity on Daily Activities in Multiple Sclerosis<br>Bethoux F, Marrie RA<br>Patient. 2016<br>9(6):537-546. doi:10.1007/s40271-016-0173-0.                                                                                                                                                                                                               | Scopus                             | Discard<br>Reasons:<br>Not of interest |
| 6.    | A double-blind, randomized, placebo-controlled, parallel group study of THC/CBD spray in peripheral neuropathic pain treatment.<br>Serpell M, Ratcliffe S, Hovorka J, Schofield M, Taylor L, Lauder H, Ehler E.<br>European Journal of pain 2014<br>18(7): 999-1012. doi: 10.1002/j.1532-2149.2013.00445.x                                                                                           | Web of Science                     | Discard<br>Reasons:<br>Not of interest |

|     |                                                                                                                                                                                                                                                                                                                                                                                            |                                    |                                        |
|-----|--------------------------------------------------------------------------------------------------------------------------------------------------------------------------------------------------------------------------------------------------------------------------------------------------------------------------------------------------------------------------------------------|------------------------------------|----------------------------------------|
| 7.  | A double-blind, randomized, placebo-controlled, parallel-group study of THC/CBD oromucosal spray in combination with the existing treatment regimen, in the relief of central neuropathic pain in patients with multiple sclerosis.<br>Langford RM, Mares J, Novotna A, Vachova M, Novakova I, Notcutt W, Ratcliffe S.<br>J Neurol. 2013<br>260(4):984-97. doi: 10.1007/s00415-012-6739-4. | Pubmed<br>Scopus<br>Web of Science | Discard<br>Reasons:<br>Not of interest |
| 8.  | A double-blind, randomized, placebo-controlled, parallel-group study of Sativex, in subjects with symptoms of spasticity due to multiple sclerosis.<br>Collin C, Ehler E, Waberzinek G, Alsindi Z, Davies P, Powell K, Notcutt W, O'Leary C, Ratcliffe S, Nováková I, Zapletalova O, Píková J, Ambler Z.<br>Neurol Res. 2010<br>32(5):451-9. doi: 10.1179/016164109X12590518685660.        | Pubmed<br>Scopus<br>Web of Science | Discard<br>Reasons:<br>Not of interest |
| 9.  | A drug discovery case history of 'delta-9- tetrahydrocannabinol, cannabidiol.<br>Tanasescu R, Rog D, Constantinescu CS<br>Expert Opinion on Drug Discovery. 2011<br>6(4):437-452. doi:10.1517/17460441.2011.560935.                                                                                                                                                                        | Scopus<br>Web of Science           | Discard<br>Reasons:<br>Not of interest |
| 10. | A growing concern.<br>Lancet Neurology. 2006<br>5(1):1. doi:10.1016/S1474-4422(05)70255-6.                                                                                                                                                                                                                                                                                                 | Scopus                             | Discard<br>Reasons:<br>Not of interest |
| 11. | A man with MS asking about medicinal cannabis.<br>Huynh W, Kiernan MC<br>Medicine Today. 2017<br>18(7):56-59.                                                                                                                                                                                                                                                                              | Scopus                             | Discard<br>Reasons:<br>Not of interest |
| 12. | A multicentre, open-label, follow-on study to assess the long-term maintenance of effect, tolerance and safety of THC/CBD oromucosal spray in the management of neuropathic pain.<br>Hoggart B, Ratcliffe S, Ehler E, Simpson KH, Hovorka J, Lejcko J, Taylor L, Lauder H, Serpell M.<br>Jornal of Neurology 2015<br>262(1):27-40. doi: 10.1007/s00415-014-7502-9.                         | Web of Science                     | Discard<br>Reasons:<br>Not of interest |
| 13. | A Multiple-Dose, Randomized, Double-Blind, Placebo-Controlled, Parallel-Group QT/QTc Study to Evaluate the Electrophysiologic Effects of THC/CBD Spray.<br>Sellers EM, Schoedel K, Bartlett C, Romach M, Russo EB, Stott CG, Wright S, White L, Duncombe P, Chen CF<br>Clin Pharmacol Drug Dev. 2013<br>(3):285-94. doi: 10.1002/cpdd.36.                                                  | Pubmed<br>Scopus<br>Web of Science | Discard<br>Reasons:<br>Not of interest |

|     |                                                                                                                                                                                                                                                                                                                                                                                                                    |                                    |                                        |
|-----|--------------------------------------------------------------------------------------------------------------------------------------------------------------------------------------------------------------------------------------------------------------------------------------------------------------------------------------------------------------------------------------------------------------------|------------------------------------|----------------------------------------|
| 14. | A new formulation of cannabidiol in cream shows therapeutic effects in a mouse model of experimental autoimmune encephalomyelitis.<br>Giacoppo S, Galuppo M, Pollastro F, Grassi G, Bramanti P, Mazzon E.<br>Daru. 2015<br>23:48. doi: 10.1186/s40199-015-0131-8.                                                                                                                                                  | Pubmed<br>Scopus<br>Web of Science | Keep                                   |
| 15. | A new multiple sclerosis spasticity treatment option: effect in everyday clinical practice and cost-effectiveness in Germany.<br>Flachenecker P.<br>Expert Rev Neurother. 2013<br>13(3 Suppl 1):15-9. doi: 10.1586/ern.13.1.                                                                                                                                                                                       | Pubmed<br>Scopus<br>Web of Science | Discard<br>Reasons:<br>Not of interest |
| 16. | A novel analgesics made from Cannabis [Uj típusú analgetikum cannabisból.]<br>Szendrei K.<br>Ideggyógyászati szemle. 2004<br>57(1-2):36-40.                                                                                                                                                                                                                                                                        | Pubmed<br>Scopus                   | Discard<br>Reasons:<br>Not of interest |
| 17. | A phase I study to assess the single and multiple dose pharmacokinetics of THC/CBD oromucosal spray.<br>Stott CG, White L, Wright S, Wilbraham D, Guy GW.<br>European Journal of Clinical Pharmacology 2013<br>69(5): 1135-1147. doi: 10.1007/s00228-012-1441-0.                                                                                                                                                   | Web of Science                     | Discard<br>Reasons:<br>Not of interest |
| 18. | A Phase I, double blind, three-way crossover study to assess the pharmacokinetic profile of cannabis based medicine extract (CBME) administered sublingually in variant cannabinoid ratios in normal healthy male volunteers (GWPK0215).<br>Guy G.W, Robson P.J.<br>Journal of Cannabis Therapeutics. 2003<br>3(4):121-152. doi:10.1300/J175v03n04_02                                                              | Scopus                             | Discard<br>Reasons:<br>Not of interest |
| 19. | A phase I, open label, four-way crossover study to compare the pharmacokinetic profiles of a single dose of 20 mg of a Cannabis Based Medicine Extract (CBME) administered on 3 different areas of the Buccal Mucosa and to investigate the pharmacokinetics of CBME per oral in healthy male and female volunteers (GWPK0112)<br>Journal of Cannabis Therapeutics. 2004<br>3(4):79-120. doi:10.1300/J175v03n04_01 | Scopus                             | Discard<br>Reasons:<br>Not of interest |
| 20. | A Phase I, open-label, randomized, crossover study in three parallel groups to evaluate the effect of Rifampicin, Ketoconazole, and Omeprazole on the pharmacokinetics of THC/CBD oromucosal spray in healthy volunteers.<br>Stott C, White L, Wright S, Wilbraham D, Guy G.<br>Springerplus 2013<br>2(1):236. doi:10.1186/2193-1801-2-236                                                                         | Web of Science                     | Discard<br>Reasons:<br>Not of interest |

|     |                                                                                                                                                                                                                                                                                                                                                                                                                                                                                                                                      |                                    |                                        |
|-----|--------------------------------------------------------------------------------------------------------------------------------------------------------------------------------------------------------------------------------------------------------------------------------------------------------------------------------------------------------------------------------------------------------------------------------------------------------------------------------------------------------------------------------------|------------------------------------|----------------------------------------|
| 21. | A placebo-controlled, parallel-group, randomized withdrawal study of subjects with symptoms of spasticity due to multiple sclerosis who are receiving long-term Sativex <sup>®</sup> (nabiximols).<br>Notcutt W, Langford R, Davies P, Ratcliffe S, Potts R.<br>Mult Scler. 2012<br>18(2):219-28. doi: 10.1177/1352458511419700.                                                                                                                                                                                                     | Pubmed<br>Scopus<br>Web of Science | Discard<br>Reasons:<br>Not of interest |
| 22. | A potted history<br>Pain S.<br>Nature. 2015<br>525, S10-S11. doi:10.1038/525S10a                                                                                                                                                                                                                                                                                                                                                                                                                                                     | Pubmed<br>Scopus                   | Discard<br>Reasons:<br>Not of interest |
| 23. | A preliminary controlled study to determine whether whole-plant cannabis extracts can improve intractable neurogenic symptoms.<br>Wade DT, Robson P, House H, Makela P, Aram<br>J. Clin Rehabil. 2003<br>17(1):21-9 doi:10.1191/0269215503cr581oa                                                                                                                                                                                                                                                                                    | Pubmed<br>Scopus<br>Web of Science | Discard<br>Reasons:<br>Not of interest |
| 24. | A questionnaire survey of patients and carers of patients prescribed Sativex as an unlicensed medicine.<br>Notcutt WG.<br>Prim Health Care Res Dev. 2013<br>14(2):192-9. doi: 10.1017/S1463423612000333                                                                                                                                                                                                                                                                                                                              | Pubmed<br>Scopus                   | Discard<br>Reasons:<br>Not of interest |
| 25. | A randomised controlled cross-over double-blind pilot study protocol on THC:CBD oromucosal spray efficacy as an add-on therapy for post-stroke spasticity.<br>Marinelli L, Balestrino M, Mori L, Puce L, Rosa GM, Giorello L, Currá A, Fattapposta F, Serrati C, Gandolfo C, Abbruzzese G, Trompetto C.<br>BMJ Open. 2017<br>7(9):e016843. doi: 10.1136/bmjopen-2017-016843                                                                                                                                                          | Pubmed<br>Scopus<br>Web of Science | Discard<br>Reasons:<br>Not of interest |
| 26. | A randomized, double-blind, placebo-controlled, parallel-group, enriched-design study of nabiximols* (Sativex <sup>®</sup> ), as add-on therapy, in subjects with refractory spasticity caused by multiple sclerosis.<br>Novotna A, Mares J, Ratcliffe S, Novakova I, Vachova M, Zapletalova O, Gasperini C, Pozzilli C, Cefaro L, Comi G, Rossi P, Ambler Z, Stelmasiak Z, Erdmann A, Montalban X, Klimek A, Davies P, Sativex Spasticity Study Group<br>Eur J Neurol. 2011<br>18(9):1122-31. doi: 10.1111/j.1468-1331.2010.03328.x | Pubmed<br>Scopus<br>Web of Science | Discard<br>Reasons:<br>Not of interest |
| 27. | A reliable and validated LC-MS/MS method for the simultaneous quantification of 4 cannabinoids in 40 consumer products.<br>Meng QF, Buchanan B, Zuccolo J, Poulin MM, Gabriele J, Baranowski DC.                                                                                                                                                                                                                                                                                                                                     | Web of Science                     | Discard<br>Reasons:<br>Not of interest |

|     |                                                                                                                                                                                                                                                                                                 |                                    |                                        |
|-----|-------------------------------------------------------------------------------------------------------------------------------------------------------------------------------------------------------------------------------------------------------------------------------------------------|------------------------------------|----------------------------------------|
|     | PLoS One. 2018<br>13(5): e0196396. doi: 10.1371/journal.pone.0196396.                                                                                                                                                                                                                           |                                    |                                        |
| 28. | A Review of Recent Advances in the Therapeutic Uses of Secondary Cannabinoids.<br>Morabito D, Soyster P, Ramey-Wright S, Belendiuk KA, Bonn-Miller MO<br>Current Addiction Reports 2016<br>3(2):230-238. doi:10.1007/s40429-016-0096-9                                                          | Scopus                             | Discard<br>Reasons:<br>Not of interest |
| 29. | A review of scientific evidence for THC:CBD oromucosal spray (nabiximols) in the management of chronic pain<br>Überall MA<br>Journal of Pain Research 2020<br>13: 399-410. doi: 10.2147/JPR.S240011                                                                                             | Scopus<br>Web of Science           | Discard<br>Reasons: Not of interest    |
| 30. | A review of the cultivation and processing of cannabis ( <i>Cannabis sativa</i> L.) for production of prescription medicines in the UK.<br>Potter DJ<br>Drug Test Anal. 2014<br>6(1-2):31-8. doi: 10.1002/dta.1531.                                                                             | Pubmed<br>Scopus<br>Web of Science | Discard<br>Reasons:<br>Not of interest |
| 31. | A review of the effects of baclofen and of THC:CBD oromucosal spray on spasticity-related walking impairment in multiple sclerosis.<br>Arroyo González R.<br>Expert Rev Neurother. 2018<br>18(10):785-791. doi: 10.1080/14737175.2018.1510772.                                                  | Pubmed<br>Scopus<br>Web of Science | Discard<br>Reasons:<br>Not of interest |
| 32. | A review on agronomic, phytochemical and pharmacological aspects of cannabis ( <i>Cannabis sativa</i> L.).<br>Asadi S, Moghadam H, Naghdi Badi H, Naghdi Badi H, Naghavi MR, Salami SAR<br>Journal of Medicinal Plants. 2019<br>2(70):1-20.                                                     | Scopus                             | Discard<br>Reasons:<br>Not of interest |
| 33. | A Sativex(®)-like combination of phytocannabinoids as a disease-modifying therapy in a viral model of multiple sclerosis.<br>Feliu A, Moreno-Martet M, Mecha M, Carrillo-Salinas FJ, de Lago E, Fernandez-Ruiz J, Guaza C.<br>Br J Pharmacol. 2015<br>172(14):3579-3595. doi: 10.1111/bph.13159 | Pubmed<br>Web of Science           | Discard<br>Reasons:<br>Not of interest |
| 34. | A Scoping Review on Clinical Trials of Pain Reduction With Cannabis Administration in Adults<br>Haleem R, Wright R<br>J Clin Med Res. 2020<br>12(6): 344–351. doi: 10.14740/jocmr4210                                                                                                           | Pubmed                             | Discard<br>Reasons: Not of interest    |

|     |                                                                                                                                                                                                                                                                                                                                                                                                                                                                                                                                                                                                         |                                    |                                        |
|-----|---------------------------------------------------------------------------------------------------------------------------------------------------------------------------------------------------------------------------------------------------------------------------------------------------------------------------------------------------------------------------------------------------------------------------------------------------------------------------------------------------------------------------------------------------------------------------------------------------------|------------------------------------|----------------------------------------|
| 35. | A single centre, placebo-controlled, four period, crossover, tolerability study assessing, pharmacodynamic effects, pharmacokinetic characteristics and cognitive profiles of a single dose of three formulations of cannabis based medicine extracts (CBMEs) (GWPD9901), plus a two period tolerability study comparing pharmacodynamic effects and pharmacokinetic characteristics of a single dose of a cannabis based medicine extract given via two administration routes (GWPD9901 EXT).<br>Guy G.W, Flint M.E.<br>Journal of Cannabis Therapeutics 2004<br>3(3):35-77. doi:10.1300/J175v03n03_03 | Scopus                             | Discard<br>Reasons:<br>Not of interest |
| 36. | A single dose of cannabidiol reduces blood pressure in healthy volunteers in a randomized crossover study.<br>Jadoon KA, Tan GD, O'Sullivan SE.<br>JCI Insight. 2017<br>2(12). doi: 10.1172/jci.insight.93760.                                                                                                                                                                                                                                                                                                                                                                                          | Pubmed<br>Scopus<br>Web of Science | Discard<br>Reasons:<br>Not of interest |
| 37. | A systematic review of pharmacological pain management in multiple sclerosis.<br>Jawahar R, Oh U, Yang S, Lapane KL<br>Drugs. 2013<br>73(15):1711-1722. doi:10.1007/s40265-013-0125-0.                                                                                                                                                                                                                                                                                                                                                                                                                  | Scopus                             | Discard<br>Reasons:<br>Not of interest |
| 38. | A systematic review of the effect of cannabidiol on cognitive function: Relevance to schizophrenia.<br>Osborne AL, Solowij N, Weston-Green K.<br>Neuroscience and Biobehavioral Reviews 2017<br>72, 310-324. doi: 10.1016/j.neubiorev.2016.11.012                                                                                                                                                                                                                                                                                                                                                       | Web of Science                     | Discard<br>Reasons:<br>Not of interest |
| 39. | A systematic review of the evidence for medical marijuana in psychiatric indications.<br>Wilkinson ST, Radhakrishnan R, D'Souza DC.<br>Journal of Clinical Psychiatry. 2016<br>77(8):1050-1064 doi:10.4088/JCP.15r10036                                                                                                                                                                                                                                                                                                                                                                                 | Scopus                             | Discard<br>Reasons:<br>Not of interest |
| 40. | A tale of two cannabinoids: the therapeutic rationale for combining tetrahydrocannabinol and cannabidiol.<br>Russo E, Guy GW.<br>Med Hypotheses 2006<br>66(2):234-46.                                                                                                                                                                                                                                                                                                                                                                                                                                   | Pubmed<br>Scopus<br>Web of Science | Discard<br>Reasons:<br>Not of interest |
| 41. | A urinary test procedure for identification of cannabidiol in patients undergoing medical therapy with marijuana.<br>Wertlake PT, Henson MD.<br>J Pain Res. 2016<br>9, 81-5. doi: 10.2147/JPR.S96856.                                                                                                                                                                                                                                                                                                                                                                                                   | Pubmed<br>Scopus<br>Web of Science | Discard<br>Reasons:<br>Not of interest |

|     |                                                                                                                                                                                                                                                                                                                                                                                               |                                    |                                        |
|-----|-----------------------------------------------------------------------------------------------------------------------------------------------------------------------------------------------------------------------------------------------------------------------------------------------------------------------------------------------------------------------------------------------|------------------------------------|----------------------------------------|
| 42. | Abuse potential and psychoactive effects of delta-9-tetrahydrocannabinol and cannabidiol oromucosal spray (Sativex), a new cannabinoid medicine.<br>Robson P.<br>Expert Opinion on Drug Safety 2011<br>10(5): 675-685. doi: 10.1517/14740338.2011.575778                                                                                                                                      | Pubmed<br>Scopus<br>Web of Science | Discard<br>Reasons:<br>Not of interest |
| 43. | Acute and chronic cannabinoid extracts administration affects motor function in a CREAE model of multiple sclerosis.<br>Buccellato E, Carretta D, Utan A, Cavina C, Speroni E, Grassi G, Candeletti S, Romualdi P.<br>J Ethnopharmacol. 2011<br>133(3):1033-8. doi: 10.1016/j.jep.2010.11.035                                                                                                 | Pubmed<br>Scopus<br>Web of Science | Keep                                   |
| 44. | Adherence to Consolidated Standards of Reporting Trials (CONSORT) Guidelines for Reporting Safety Outcomes in Trials of Cannabinoids for Chronic Pain: Protocol for a Systematic Review.<br>Mohiuddin MM, Mizubuti G, Haroutounian S, Smith S, Campbell F, Park R, Gilron I.<br>JMIR Res Protoc. 2019<br>8(1), e11637. doi: 10.2196/11637                                                     | Pubmed<br>Web of Science           | Discard<br>Reasons:<br>Not of interest |
| 45. | Adherence to Consolidated Standards of Reporting Trials (CONSORT) Guidelines for Reporting Safety Outcomes in Trials of Medical Cannabis and Cannabis-based Medicines for Chronic Noncancer Pain A Systematic Review.<br>Mohiuddin MM, Mizubuti GB, Haroutounian S, Smith SM, Rice ASC, Campbell F, Park R, Gilron I<br>Clin J Pain 2020<br>36(4):302-319. doi: 10.1097/AJP.0000000000000807. | Web of Science                     | Discard<br>Reasons: Not of interest    |
| 46. | Advances in the management of MS spasticity: recent observational studies.<br>Fernández O.<br>Eur Neurol. 2014<br>72 Suppl 1:12-4. doi: 10.1159/000367618.                                                                                                                                                                                                                                    | Pubmed<br>Scopus                   | Discard<br>Reasons:<br>Not of interest |
| 47. | Advances in the management of MS symptoms: real-life evidence.<br>Trojano M<br>Neurodegenerative disease management.2015<br>5(6):19-21. doi:10.2217/nmt.15.66                                                                                                                                                                                                                                 | Pubmed<br>Scopus                   | Discard<br>Reasons:<br>Not of interest |
| 48. | Advances in the management of MS symptoms: recently proposed clinical management algorithms.<br>Vermersch P.<br>Neurodegener Dis Manag. 2015<br>5(6 Suppl):23-6. doi: 10.2217/nmt.15.57.                                                                                                                                                                                                      | Pubmed<br>Scopus                   | Discard<br>Reasons:<br>Not of interest |

|     |                                                                                                                                                                                                                                                                                 |                                    |                                        |
|-----|---------------------------------------------------------------------------------------------------------------------------------------------------------------------------------------------------------------------------------------------------------------------------------|------------------------------------|----------------------------------------|
| 49. | Advances in the management of multiple sclerosis spasticity: experiences from recent studies and everyday clinical practice.<br>Pozzilli C.<br>Expert Rev Neurother. 2013<br>13(12 Suppl):49-54. doi: 10.1586/14737175.2013.865877.                                             | Pubmed<br>Scopus<br>Web of Science | Discard<br>Reasons:<br>Not of interest |
| 50. | Advances in the management of multiple sclerosis spasticity: multiple sclerosis spasticity nervous pathways.<br>Centonze D.<br>Eur Neurol. 2014<br>72 Suppl 1:6-8. doi: 10.1159/000367615.                                                                                      | Pubmed<br>Scopus                   | Discard<br>Reasons:<br>Not of interest |
| 51. | Advances in the management of multiple sclerosis spasticity: Multiple sclerosis spasticity guidelines<br>Gold R, Oreja-Guevara C<br>Expert Review of Neurotherapeutics. 2013<br>13(12 SUPPL.):55-59. doi:10.1586/14737175.2013.865880                                           | Scopus                             | Discard<br>Reasons:<br>Not of interest |
| 52. | Advances in the management of multiple sclerosis spasticity: recent clinical trials.<br>Fernández O.<br>Eur Neurol. 2014<br>72 Suppl 1:9-11. doi: 10.1159/000367616.                                                                                                            | Pubmed<br>Scopus                   | Discard<br>Reasons:<br>Not of interest |
| 53. | Advances in the management of multiple sclerosis-related spasticity.<br>Hartung H-P<br>Expert Review of Neurotherapeutics. 2012<br>12(4) SUPPL.:1-2. doi:10.1586/ern.12.10                                                                                                      | Scopus                             | Discard<br>Reasons:<br>Not of interest |
| 54. | Advances in the Understanding and Management of Chronic Pain in Multiple Sclerosis: a Comprehensive Review<br><u>Urits I, Adamian L, Fiocchi J, Hoyt D, Ernst C, Kaye AD, Viswanath O</u><br>Current Pain and Headache Reports. 2019<br>23(8):59. doi:10.1007/s11916-019-0800-2 | Scopus                             | Discard<br>Reasons:<br>Not of interest |
| 55. | Adverse and palliative effects of the cannabinoids [Efectos adversos y paliativos de los cannabinoides]<br>Contreras CM, Gutierrez Garcia AGG, Saavedra M, Bernal-Morales B, Landa JFR, Hernández-Lozano M<br>Salud Mental. 2003<br>26(6):62-75.                                | Scopus<br>Web of Science           | Discard<br>Reasons:<br>Not of interest |
| 56. | Adverse effects from a cannabis spray<br>Brand H<br>British Dental Journal. 2007                                                                                                                                                                                                | Scopus                             | Discard<br>Reasons:<br>Not of interest |



|     |                                                                                                                                                                                                                                                                                                                                   |                                    |                                        |
|-----|-----------------------------------------------------------------------------------------------------------------------------------------------------------------------------------------------------------------------------------------------------------------------------------------------------------------------------------|------------------------------------|----------------------------------------|
|     | 203(6):336-337. doi:10.1038/bdj.2007.852                                                                                                                                                                                                                                                                                          |                                    |                                        |
| 57. | Adverse effects of medical cannabinoids: A systematic review.<br>Wang T, Collet J-P, Shapiro S, Ware MA<br>CMAJ. 2008<br>178(13):1669-1678. doi:10.1503/cmaj.071178                                                                                                                                                               | Scopus                             | Discard<br>Reasons:<br>Not of interest |
| 58. | Adverse health effects of marijuana use<br>Volkow N, Baler RD, Compton W, Weiss SRB<br>New England Journal of Medicine. 2014<br>370(23):2219-2227. doi:10.1056/NEJMra1402309                                                                                                                                                      | Scopus                             | Discard<br>Reasons:<br>Not of interest |
| 59. | Agonistic properties of cannabidiol at 5-HT1a receptors.<br>Russo EB, Burnett A, Hall B, Parker KK.<br>Neurochemical Research 2005<br>30(8):1037-1043. doi: 10.1007/s11064-005-6978-1                                                                                                                                             | Web of Science                     | Discard<br>Reasons:<br>Not of interest |
| 60. | “ALS reversals”: demographics, disease characteristics, treatments, and co-morbidities.<br>Harrison D, Mehta P, van Es MA, Stommel E, Drory VE, Nefussy B, van den Berg LH,<br>Crayle J, Bedlack R.<br>Amyotrophic Lateral Sclerosis and Frontotemporal Degeneration 2018<br>19(7-8): 495-499. doi: 10.1080/21678421.2018.1457059 | Pubmed<br>Scopus<br>Web of Science | Discard<br>Reasons:<br>Not of interest |
| 61. | Alzheimer disease: Crosstalk between the canonical Wnt/beta-catenin pathway and<br>PPARs alpha and gamma<br>Vallée A, Lecarpentier Y<br>Frontiers in Neuroscience. 2016<br>459(50). doi:10.3389/fnins.2016.00459                                                                                                                  | Scopus                             | Discard<br>Reasons:<br>Not of interest |
| 62. | American academy of neurology – 70th annual meeting<br>Mila M<br>Drugs of the Future. 2018<br>43(6):457-465. doi:10.1358/dof.2018.043.06.2823637                                                                                                                                                                                  | Scopus                             | Discard<br>Reasons:<br>Not of interest |
| 63. | An epileptic seizure in a patient with multiple sclerosis treated with THC/CBD (Sativex™)<br>Aparicio RR, Polo VO<br>Atencion Farmaceutica. 2013<br>15(6):439-442                                                                                                                                                                 | Scopus<br>Web of Science           | Discard<br>Reasons:<br>Not of interest |
| 64. | An observational postmarketing safety registry of patients in the UK, Germany, and<br>Switzerland who have been prescribed Sativex® (THC:CBD, nabiximols) oromucosal<br>spray<br>Etges T, Karolia K, Grint T, Taylor A, Lauder H, Daka B, Wright S.<br>Ther Clin Risk Manag. 2016<br>12:1667-1675. doi: 10.2147/TCRM.S115014      | Pubmed<br>Scopus<br>Web of Science | Discard<br>Reasons:<br>Not of interest |

|     |                                                                                                                                                                                                                                                                  |                                    |                                        |
|-----|------------------------------------------------------------------------------------------------------------------------------------------------------------------------------------------------------------------------------------------------------------------|------------------------------------|----------------------------------------|
| 65. | An open-label pilot study of cannabis-based extracts for bladder dysfunction in advanced multiple sclerosis<br>Brady CM, DasGupta R, Dalton C, Wiseman OJ, Berkley KJ, Fowler CJ.<br>Mult Scler. 2004<br>10(4):425-33 doi:10.1191/1352458504ms1063oa             | Pubmed<br>Scopus<br>Web of Science | Discard<br>Reasons:<br>Not of interest |
| 66. | An Update of Current Cannabis-Based Pharmaceuticals in Pain Medicine<br>Urits I, Borchart M, Hasegawa M, Kochanski J, Orhurhu V, Viswanath O.<br>Pain Ther. 2019<br>8(1):41-51. doi: 10.1007/s40122-019-0114-4.                                                  | Pubmed<br>Web of Science           | Discard<br>Reasons:<br>Not of interest |
| 67. | An Update on the Management of Neurogenic Bladder<br>Sanford MT, Ginsberg DA<br>Current Bladder Dysfunction Reports. 2017<br>12(1):15-25. doi:10.1007/s11884-017-0409-4                                                                                          | Scopus                             | Discard<br>Reasons:<br>Not of interest |
| 68. | Analytical and Pharmacological Challenges in Cannabis Research<br>Gertsch J<br>Planta Medica. 2018<br>84(4):213. doi:10.1055/s-0044-101051                                                                                                                       | Scopus                             | Discard<br>Reasons:<br>Not of interest |
| 69. | Anandamide: An update<br>Smita K, Kumar VS, Premendran JS<br>Fundamental and Clinical Pharmacology 2007<br>21(1):1-8. doi:10.1111/j.1472-8206.2006.00454.x                                                                                                       | Scopus                             | Discard<br>Reasons:<br>Not of interest |
| 70. | Aplicaciones terapéuticas por acción de los cannabinoides<br>Plancarte-Sánchez R, Mansilla-Olivares A, De Los Reyes-Pacheco VA, Meneses-González F.<br>Gac Med Mex. 2019<br>155(3):307-318. doi: 10.24875/GMM.18004928                                           | Pubmed<br>Scopus                   | Discard<br>Reasons:<br>Not of interest |
| 71. | Application device for THC:CBD oromucosal spray in the management of resistant spasticity: pre-production testing.<br>Montero-Escribano P, Vila Silván C.<br>Expert Rev Med Devices. 2019<br>16(9):835-840. doi: 10.1080/17434440.2019.1653182.                  | Pubmed<br>Scopus<br>Web of Science | Discard<br>Reasons:<br>Not of interest |
| 72. | Application of Medical Cannabis in Patients with Central Nerve System Disorders.<br>Kotula L, Petniak A, Kolodziej E, Amarowicz M, Urbanczuk M, Schab K, Gil-Kulik P, Karwat J, Kotula J, Mulawka P, Mulawka D, Kocki J. Modern Phytomorphology 2015<br>8: 65-70 | Web of Science                     | Discard<br>Reasons:<br>Not of interest |
| 73. | Assessment of blinding to treatment allocation in studies of a cannabis-based medicine (Sativex®) in people with multiple sclerosis: a new approach.                                                                                                             | PubMed<br>Scopus                   | Discard<br>Reasons:                    |

|     |                                                                                                                                                                                                                                                                                                          |                                    |                                        |
|-----|----------------------------------------------------------------------------------------------------------------------------------------------------------------------------------------------------------------------------------------------------------------------------------------------------------|------------------------------------|----------------------------------------|
|     | Wright S, Duncombe P, Altman DG.<br>Trials 2012<br>13:189. doi: 10.1186/1745-6215-13-189                                                                                                                                                                                                                 |                                    | Not of interest                        |
| 74. | Assessment of the effectiveness and safety of Sativex® in compassionate use<br>Cimas-Hernando I, Pato-Pato A, Lorenzo-González JR, Rodríguez-Constenla I.<br>Rev Neurol. 2015<br>60(5):202-6                                                                                                             | PubMed<br>Scopus                   | Discard<br>Reasons:<br>Not of interest |
| 75. | Author response<br>Robert MP, Plant GT<br>Neurology. 2014<br>83(16):1485-1486. doi:10.1212/WNL.0000000000000924                                                                                                                                                                                          | Scopus                             | Discard<br>Reasons:<br>Not of interest |
| 76. | Availability and approval of cannabis-based medicines for chronic pain management and palliative/supportive care in Europe: A survey of the status in the chapters of the European Pain Federation<br>Krcovski-Skvarc N, Wells C, Häuser W.<br>Eur J Pain. 2018<br>22(3):440-454. doi: 10.1002/ejp.1147. | PubMed<br>Scopus<br>Web of Science | Discard<br>Reasons:<br>Not of interest |
| 77. | Avidekel Cannabis extracts and cannabidiol are as efficient as Copaxone in suppressing EAE in SJL/J mice<br>Gallily R, Yekhtin Z.<br>Inflammopharmacology 2019<br>27(1):167-173. doi: 10.1007/s10787-018-0536-3                                                                                          | PubMed<br>Scopus<br>Web of Science | Keep                                   |
| 78. | Balance worsening associated with nabiximols in multiple sclerosis<br>Castelli L, Prosperini L, Pozzilli C.<br>Mult Scler. 2019<br>25(1):113-117. doi: 10.1177/1352458518765649.                                                                                                                         | PubMed<br>Scopus<br>Web of Science | Discard<br>Reasons:<br>Not of interest |
| 79. | Barriers to the wider adoption of medicinal Cannabis<br>Alexander SPH<br>British Journal of Pain 2020<br>14(2): 122-132 doi: 10.1177/2049463720922884                                                                                                                                                    | Scopus                             | Discard<br>Reasons: Not of interest    |
| 80. | Benefits and Risks of Therapeutic Cannabinoids for Neurologic Disorders<br>Patwa HS<br>Clinical Therapeutics. 2018<br>40(9):1436-1437 doi:10.1016/j.clinthera.2018.08.001                                                                                                                                | Scopus                             | Discard<br>Reasons:<br>Not of interest |
| 81. | Beyond THC and Endocannabinoids<br>Pacher P, Kogan NM, Mechoulam R<br>Annual Review of Pharmacology and Toxicology 2020                                                                                                                                                                                  | Web of Science                     | Discard<br>Reasons: Not of interest    |

|     |                                                                                                                                                                                                                                                                                                                                    |                                    |                                        |
|-----|------------------------------------------------------------------------------------------------------------------------------------------------------------------------------------------------------------------------------------------------------------------------------------------------------------------------------------|------------------------------------|----------------------------------------|
|     | 60:637-659 doi: 10.1146/annurev-pharmtox-010818-021441                                                                                                                                                                                                                                                                             |                                    |                                        |
| 82. | Big cannabis in the UK: is industry support for wider patient access motivated by promises of recreational market worth billions?<br>Gornall J<br>BMJ 2020<br>368:m1002 doi: <a href="https://doi.org/10.1136/bmj.m1002">https://doi.org/10.1136/bmj.m1002</a>                                                                     | Scopus                             | Discard<br>Reasons: Not of interest    |
| 83. | Bones and Joints: The Effects of Cannabinoids on the Skeleton.<br>Ehrenkranz J, Levine MA.<br>Journal Of Clinical Endocrinology & Metabolism 2019<br>104(10) 4683-4694 doi: 10.1210/jc.2019-00665                                                                                                                                  | Web of Science                     | Discard<br>Reasons:<br>Not of interest |
| 84. | Brain cannabinoid systems as targets for the therapy of neurological disorders<br>Consroe P<br>Neurobiology of Disease. 1998<br>5(6):534-551 doi:10.1006/nbdi.1998.0220                                                                                                                                                            | Scopus                             | Discard<br>Reasons:<br>Not of interest |
| 85. | Brain functional MRI changes in multiple sclerosis patients treated with Tetrahydrocannabinol: Cannabidiol (THC:CBD) oromucosal spray for spasticity<br>Gajofatto A, Cardobi N, Gobbin F, Calabrese M, Barillari M, Turatti M, Benedetti MD.<br>MULTIPLE SCLEROSIS JOURNAL 2016<br>Meeting Abstract: P508 22:223-224 Supplement: 3 | Web of Science                     | Discard<br>Reasons:<br>Not of interest |
| 86. | Can pharmacological manipulation of LTP favor the effects of motor rehabilitation in multiple sclerosis?<br>Stampanoni Bassi M, Leocani L, Comi G, Iezzi E, Centonze D<br>Multiple Sclerosis Journal, 2018<br>24(7):902-907 doi:10.1177/1352458517721358                                                                           | Scopus                             | Discard<br>Reasons:<br>Not of interest |
| 87. | Cannabidiol (CBD) and its analogs: a review of their effects on inflammation.<br>Burstein S<br>Biorganic & Medical Chemistry 2015<br>23(7):1377-1385 doi: 10.1016/j.bmc.2015.01.059                                                                                                                                                | Web of Science                     | Discard<br>Reasons:<br>Not of interest |
| 88. | Cannabidiol (CBD) enhances lipopolysaccharide (LPS)-induced pulmonary inflammation in C57BL/6 mice<br>Karmaus PW, Wagner JG, Harkema JR, Kaminski NE, Kaplan BL.<br>J Immunotoxicol. 2013<br>10(3):321-8. doi: 10.3109/1547691X.2012.741628                                                                                        | Pubmed<br>Scopus<br>Web of Science | Discard Reasons: Not of interest       |
| 89. | Cannabidiol (CBD) for Treatment of Neurofibromatosis-related Pain and Concomitant Mood Disorder: A Case Report<br>Hegazy O, Platnick H<br>Cureus 2019                                                                                                                                                                              | Scopus<br>Web of Science           | Discard<br>Reasons:<br>Not of interest |

|     |                                                                                                                                                                                                                                                                                                             |                                    |                                  |
|-----|-------------------------------------------------------------------------------------------------------------------------------------------------------------------------------------------------------------------------------------------------------------------------------------------------------------|------------------------------------|----------------------------------|
|     | 11(12): e6312. doi:10.7759/cureus.6312                                                                                                                                                                                                                                                                      |                                    |                                  |
| 90. | Cannabidiol (CBD) induces functional Tregs in response to low-level T cell activation.<br>Dhital S, Stokes JV, Park N, Seo KS, Kaplan BLF.<br>Cellular Immunology 2017<br>312: 25-34 doi: 10.1016/j.cellimm.2016.11.006                                                                                     | Web of Science                     | Discard Reasons: Not of interest |
| 91. | Cannabidiol and Multiple Sclerosis<br>Mecha M, Feliu A, Carrillo-Salinas FJ, Guaza C<br>Handbook of Cannabis and Related Pathologies: Biology, Pharmacology, Diagnosis, and Treatment. 2017<br>893:904 doi:10.1016/B978-0-12-800756-3.00108-3                                                               | Scopus                             | Discard Reasons: Not of interest |
| 92. | Cannabidiol and Neuroprotection: Evidence from Preclinical Studies<br>Schröder N, da Silva VK, Hallak JEC, Zuardi AW<br>Handbook of Cannabis and Related Pathologies: Biology, Pharmacology, Diagnosis, and Treatment. 2017<br>802-812 doi:10.1016/B978-0-12-800756-3.00095-8                               | Scopus                             | Discard Reasons: Not of interest |
| 93. | Cannabidiol as a Potential Treatment for Febrile Infection-Related Epilepsy Syndrome (FIRES) in the Acute and Chronic Phases<br>Gofshteyn JS, Wilfong A, Devinsky O, Bluvstein J, Charuta J, Ciliberto MA, Laux L, Marsh ED<br>Journal of Child Neurology. 2017<br>32(1):35-40 doi:10.1177/0883073816669450 | Scopus                             | Discard Reasons: Not of interest |
| 94. | Cannabidiol as a Promising Strategy to Treat and Prevent Movement Disorders?<br>Peres FF, Lima AC, Hallak JEC, Crippa JA, Silva RH, Abilio VC.<br>Frontiers in Pharmacology 2018<br>9: 482 doi: 10.3389/fphar.2018.00482                                                                                    | Web of Science                     | Discard Reasons: Not of interest |
| 95. | Cannabidiol as a therapy for ASIA syndrome? An editorial on a novel study<br>Katz D, Shoenfeld Y<br>Israel Medical Association Journal 2017<br>19(2):98-99                                                                                                                                                  | Scopus                             | Discard Reasons: Not of interest |
| 96. | Cannabidiol as a Treatment for Mood Disorders: A Systematic Review<br>Pinto JV, Saraf G, Frysck C, Vigo D, Keramatian K, Chakrabarty T, Lam RW, Kauer-Sant'Anna M, Yatham LN<br>The Canadian Journal of Psychiatry 2019<br>65(4) doi:10.1177/0706743719895195                                               | Web of Science                     | Discard Reasons: Not of interest |
| 97. | Cannabidiol attenuates cardiac dysfunction, oxidative stress, fibrosis, and inflammatory and cell death signaling pathways in diabetic cardiomyopathy                                                                                                                                                       | Pubmed<br>Scopus<br>Web of Science | Discard Reasons: Not of interest |

|      |                                                                                                                                                                                                                                                                                                       |                                    |                                        |
|------|-------------------------------------------------------------------------------------------------------------------------------------------------------------------------------------------------------------------------------------------------------------------------------------------------------|------------------------------------|----------------------------------------|
|      | Rajesh M, Mukhopadhyay P, B tkai S, Patel V, Saito K, Matsumoto S, Kashiwaya Y, Horv th B, Mukhopadhyay B, Becker L, Hask  G, Liaudet L, Wink DA, Veves A, Mechoulam R, Pacher P.<br>J Am Coll Cardiol. 2010<br>56(25):2115-25. doi: 10.1016/j.jacc.2010.07.033                                       |                                    |                                        |
| 98.  | Cannabidiol attenuates cisplatin-induced nephrotoxicity by decreasing oxidative/nitrosative stress, inflammation, and cell death<br>Pan H, Mukhopadhyay P, Rajesh M, Patel V, Mukhopadhyay B, Gao B, Hask  G, Pacher P.<br>J Pharmacol Exp Ther. 2009<br>328(3):708-14. doi: 10.1124/jpet.108.147181. | Pubmed<br>Scopus<br>Web of Science | Discard<br>Reasons:<br>Not of interest |
| 99.  | Cannabidiol attenuates deficits of visuospatial associative memory induced by Delta 9tetrahydrocannabinol.<br>Wright MJ, Vandewater SA, Taffe MA.<br>British Journal of Pharmacology 2013<br>170(7):1365-1373 doi:10.1111/bph.12199                                                                   | Web of Science                     | Discard<br>Reasons:<br>Not of interest |
| 100. | Cannabidiol Attenuates Experimental Autoimmune Encephalomyelitis Model of Multiple Sclerosis Through Induction of Myeloid-Derived Suppressor Cells<br>Elliott DM, Singh N, Nagarkatti M, Nagarkatti PS.<br>Front Immunol. 2018<br>9:1782. doi: 10.3389/fimmu.2018.01782                               | Pubmed<br>Scopus<br>Web of Science | Keep                                   |
| 101. | Cannabidiol attenuates high glucose-induced endothelial cell inflammatory response and barrier disruption<br>Rajesh M, Mukhopadhyay P, B tkai S, Hask  G, Liaudet L, Drel VR, Obrosova IG, Pacher P.<br>Am J Physiol Heart Circ Physiol. 2007<br>293(1):H610-9. doi:10.1152/ajpheart.00236.2007.      | Pubmed<br>Scopus<br>Web of Science | Discard<br>Reasons:<br>Not of interest |
| 102. | Cannabidiol bioavailability after nasal and transdermal application: effect of permeation enhancers.<br>Paudel KS, Hammell DC, Agu RU, Valiveti S, Stinchcomb AL<br>Drug Development and Industrial Pharmacy 2010<br>36(9): 1088-1097 doi: 10.3109/03639041003657295                                  | Web of science                     | Discard<br>Reasons:<br>Not of interest |
| 103. | Cannabidiol causes endothelium-dependent vasorelaxation of human mesenteric arteries via CB1 activation<br>Stanley CP, Hind WH, Tufarelli C, O'Sullivan SE.<br>Cardiovasc Res. 2015<br>107(4):568-78. doi: 10.1093/cvr/cvv179.                                                                        | Pubmed<br>Scopus<br>Web of Science | Discard<br>Reasons:<br>Not of interest |

|      |                                                                                                                                                                                                                                                                                                                                                                             |                                    |                                        |
|------|-----------------------------------------------------------------------------------------------------------------------------------------------------------------------------------------------------------------------------------------------------------------------------------------------------------------------------------------------------------------------------|------------------------------------|----------------------------------------|
| 104. | Cannabidiol Elevates Mechanistic Target of Rapamycin Inhibitor Levels in Patients With Tuberous Sclerosis Complex<br>Ebrahimi-Fakhari D, Agricola KD, Tudor C, Krueger D, Franz DN<br>Pediatr Neurol. 2020<br>105:59-61. doi: 10.1016/j.pediatrneurol.2019.11.017                                                                                                           | Pubmed<br>Scopus<br>Web of Science | Discard<br>Reasons:<br>Not of interest |
| 105. | Cannabidiol for Dravet and Lennox-Gastaut syndromes: NICE guidance<br>Gaber T<br>Progress in Neurology and Psychiatry 2020<br>24(2): 4-6                                                                                                                                                                                                                                    | Scopus                             | Discard<br>Reasons:<br>Not of interest |
| 106. | Cannabidiol for Viral Diseases: Hype or Hope?<br>Mabou Tagne A, Pacchetti B, Sodergren M, Cosentino M, Marino F.<br>Cannabis Cannabinoid Res. 2020<br>5(2): 121-131 doi:10.1089/can.2019.0060                                                                                                                                                                               | Pubmed<br>Scopus                   | Discard<br>Reasons:<br>Not of interest |
| 107. | Cannabidiol improves lung function and inflammation in mice submitted to LPS-induced acute lung injury.<br>Ribeiro A, Almeida VI, Costola-de-Souza C, Ferraz-de-Paula V, Pinheiro ML, Vitoretto LB, Gimenes JA, Akamine AT, Crippa JA, Tavares-de-Lima W, Palermo-Neto J.<br>Immunopharmacology and Immunotoxicology 2015<br>37(1): 35-41 doi: 10.3109/08923973.2014.976794 | Web of Science                     | Discard<br>Reasons:<br>Not of interest |
| 108. | Cannabidiol in humans-The quest for therapeutic targets<br>Zhornitsky S, Potvin S<br>Pharmaceuticals 2012<br>5(5):529-552 doi:10.3390/ph5050529                                                                                                                                                                                                                             | PubMed<br>Scopus                   | Discard<br>Reasons:<br>Not of interest |
| 109. | Cannabidiol in medicine: A review of its therapeutic potential in CNS disorders<br>Scuderi C, De Filippis D, Iuvone T, Blasio A, Steardo A, Esposito G<br>Phytotherapy Research 2009<br>23(5):597-602 doi:10.1002/ptr.2625                                                                                                                                                  | Scopus                             | Discard<br>Reasons:<br>Not of interest |
| 110. | Cannabidiol Increases Survival and Promotes Rescue of Cognitive Function in a Murine Model of Cerebral Malaria<br>Campos AC, Brant F, Miranda AS, Machado FS, Teixeira AL<br>NEUROSCIENCE 2015<br>289: 166-180 doi: 10.1016/j.neuroscience.2014.12.051                                                                                                                      | Web of Science                     | Discard<br>Reasons:<br>Not of interest |
| 111. | Cannabidiol induced apoptosis in human monocytes through mitochondrial permeability transition pore-mediated ROS production.<br>Wu HY, Huang CH, Lin YH, Wang CC, Jan TR.<br>Free Radic Biol Med. 2018<br>124: 311-318 doi: 10.1016/j.freeradbiomed.2018.06.023                                                                                                             | Web of Science                     | Discard<br>Reasons:<br>Not of interest |

|      |                                                                                                                                                                                                                                                                                                                                                                                                    |                                    |                                        |
|------|----------------------------------------------------------------------------------------------------------------------------------------------------------------------------------------------------------------------------------------------------------------------------------------------------------------------------------------------------------------------------------------------------|------------------------------------|----------------------------------------|
| 112. | Cannabidiol inhibits paclitaxel-induced neuropathic pain through 5-HT1A receptors without diminishing nervous system function or chemotherapy efficacy<br>Ward SJ, McAllister SD, Kawamura R, Murase R, Neelakantan H, Walker EA<br>British Journal of Pharmacology 2014<br>171(3) SI: 636-645 DOI: 10.1111/bph.12439                                                                              | Web of Science                     | Discard<br>Reasons:<br>Not of interest |
| 113. | Cannabidiol inhibits pathogenic T cells, decreases spinal microglial activation and ameliorates multiple sclerosis-like disease in C57BL/6 mice<br>Kozela E, Lev N, Kaushansky N, Eilam R, Rimmerman N, Levy R, Ben-Nun A, Juknat A, Vogel Z.<br>Br J Pharmacol. 2011<br>163(7):1507-19. doi: 10.1111/j.1476-5381.2011.01379.x                                                                     | Pubmed<br>Scopus<br>Web of Science | Keep                                   |
| 114. | Cannabidiol Limits T Cell-Mediated Chronic Autoimmune Myocarditis: Implications to Autoimmune Disorders and Organ Transplantation<br>Lee WS, Erdelyi K, Matyas C, Mukhopadhyay P, Varga ZV, Liaudet L, Haskú G, Čiháková D, Mechoulam R, Pacher P<br>Mol Med. 2016<br>22:136-146. doi: 10.2119/molmed.2016.00007                                                                                   | Pubmed<br>Scopus<br>Web of Science | Discard Reasons: Not of interest       |
| 115. | Cannabidiol Normalizes Caspase 3, Synaptophysin, and Mitochondrial Fission Protein DNMI1 Expression Levels in Rats with Brain Iron Overload: Implications for Neuroprotection.<br>da Silva VK, de Freitas BS, Dornelles AD, Nery LR, Falavigna L, Ferreira RD, Bogo MR, Hallak JEC, Zuardi AW, Crippa JAS, Schroder N Molecular Neurobiology 2014<br>49(1): 222-233 doi: 10.1007/s12035-013-8514-7 | Web of Science                     | Discard<br>Reasons:<br>Not of interest |
| 116. | Cannabidiol prescription in clinical practice: An audit on the first 400 patients in New Zealand<br>Gulbransen G, Xu W, Arroll B<br>BJGP Open 2020<br>4(1): 8p                                                                                                                                                                                                                                     | Scopus                             | Discard<br>Reasons:<br>Not of interest |
| 117. | Cannabidiol prevents haloperidol-induced vacuos chewing movements and inflammatory changes in mice via PPAR gamma receptors.<br>Sonego AB, Prado DS, Vale GT, Sepulveda-Diaz JE, Cunha TM, Tirapelli CR, Del Bel EA, Raisman-Vozar, R, Guimaraes FS<br>Brain Behavior and Immunity 2018<br>74: 241-251 doi: 10.1016/j.bbi.2018.09.014                                                              | Web of Science                     | Discard<br>Reasons:<br>Not of interest |
| 118. | Cannabidiol prevents LPS-induced microglial inflammation by inhibiting ROS/NF-kappa B-dependent signaling and glucose consumption.<br>dos-Santos-Pereira M; Guimaraes FS, Del-Bel E, Raisman-Vozari R, Michel PP                                                                                                                                                                                   | Web of Science                     | Discard<br>Reasons:<br>Not of interest |



|      |                                                                                                                                                                                                                                                                                                                                                                                                                                                                      |                                    |                                        |
|------|----------------------------------------------------------------------------------------------------------------------------------------------------------------------------------------------------------------------------------------------------------------------------------------------------------------------------------------------------------------------------------------------------------------------------------------------------------------------|------------------------------------|----------------------------------------|
|      | Glia 2019<br>DOI: 10.1002/glia.23738                                                                                                                                                                                                                                                                                                                                                                                                                                 |                                    |                                        |
| 119. | Cannabidiol protects oligodendrocyte progenitor cells from inflammation-induced apoptosis by attenuating endoplasmic reticulum stress<br>Mecha M, Torrao AS, Mestre L, Carrillo-Salinas FJ, Mechoulam R, Guaza C.<br>Cell Death Dis. 2012<br>3(6):e331. doi: 10.1038/cddis.2012.71                                                                                                                                                                                   | Pubmed<br>Scopus<br>Web of Science | Discard<br>Reasons:<br>Not of interest |
| 120. | Cannabidiol provides long-lasting protection against the deleterious effects of inflammation in a viral model of multiple sclerosis: a role for A2A receptors<br>Mecha M, Feliú, Iñigo PM, Mestre L, Carrillo-Salinas FJ, Guaza C.<br>Neurobiol Dis. 2013<br>59:141-50. doi: 10.1016/j.nbd.2013.06.016.                                                                                                                                                              | Pubmed<br>Scopus<br>Web of Science | Keep                                   |
| 121. | Cannabidiol Regulates Gene Expression in Encephalitogenic T cells Using Histone Methylation and noncoding RNA during Experimental Autoimmune Encephalomyelitis<br>Yang X, Bam M, Nagarkatti PS, Nagarkatti M.<br>Sci Rep. 2019<br>9(1):15780. doi: 10.1038/s41598-019-52362-8                                                                                                                                                                                        | Pubmed<br>Scopus<br>Web of Science | Keep                                   |
| 122. | Cannabidiol to Improve Mobility in People with Multiple Sclerosis<br>Rudroff T, Sosnoff J.<br>Front Neurol. 2018<br>9:183. doi: 10.3389/fneur.2018.00183.                                                                                                                                                                                                                                                                                                            | Pubmed<br>Scopus<br>Web of Science | Discard<br>Reasons:<br>Not of interest |
| 123. | Cannabidiol, a Major Non-Psychotropic Cannabis Constituent Enhances Fracture Healing and Stimulates Lysyl Hydroxylase Activity in Osteoblasts.<br>Kogan NM, Melamed E, Wasserman E, Raphael B, Breuer A, Stok KS, Sondergaard R, Escudero AW, Baraghithy S, Attar-Namdar M, Friedlander-Barenboim S, Mathavan N, Isaksson H, Mechoulam R, Muller R, Bajayo A, Gabet Y, Bab I<br>Journal of Bone and Mineral Research 2015<br>30(10):1905-1913 DOI: 10.1002/jbmr.2513 | Web of Science                     | Discard<br>Reasons:<br>Not of interest |
| 124. | Cannabidiol, a non-psychoactive cannabinoid, leads to EGR2-dependent anergy in activated encephalitogenic T cells<br>Kozela E, Juknat A, Kaushansky N, Ben-Nun A, Coppola G, Vogel Z.<br>J Neuroinflammation. 2015<br>12:52. doi: 10.1186/s12974-015-0273-0                                                                                                                                                                                                          | Pubmed<br>Scopus<br>Web of Science | Keep                                   |
| 125. | Cannabidiol, a nonpsychoactive Cannabis constituent, protects against myocardial ischemic reperfusion injury.<br>Durst R, Danenberg H, Gallily R, Mechoulam R, Meir K, Grad E, Beeri, R, Pugatsch T, Tarsish E, Lotan C                                                                                                                                                                                                                                              | Web of Science                     | Discard<br>Reasons:<br>Not of interest |

|      |                                                                                                                                                                                                                                                                                                                          |                                    |                                        |
|------|--------------------------------------------------------------------------------------------------------------------------------------------------------------------------------------------------------------------------------------------------------------------------------------------------------------------------|------------------------------------|----------------------------------------|
|      | Am J Physiol Heart Circ Physiol. 2007<br>293(6): H3602-H3607 doi: 10.1152/ajpheart.00098.2007                                                                                                                                                                                                                            |                                    |                                        |
| 126. | Cannabidiol, neuroprotection and neuropsychiatric disorders.<br>Campos AC, Fogaca MV, Sonego AB, Guimaraes FS<br>Pharmacological Research 2016<br>112, 119-127 doi: 10.1016/j.phrs.2016.01.033                                                                                                                           | Web of Science                     | Discard<br>Reasons:<br>Not of interest |
| 127. | Cannabidiol: A Promising Drug for Neurodegenerative Disorders?<br>Iuvone T, Esposito G, De Filippis D, Scuderi C, Steardo L<br>CNS Neurosci Ther. 2009<br>15(1): 65-75 doi: 10.1111/j.1755-5949.2008.00065.x                                                                                                             | Pubmed<br>Scopus<br>Web of Science | Discard<br>Reasons:<br>Not of interest |
| 128. | Cannabidiol: an alternative therapeutic agent for oral mucositis?<br>Cuba LF, Salum FG, Cherubini K, Figueiredo MAZ<br>Journal of Clinical Pharmacy and Therapeutics 2017<br>42(3):245-250 doi:10.1111/jcpt.12504                                                                                                        | Scopus                             | Discard<br>Reasons:<br>Not of interest |
| 129. | Cannabidiol: Promise and Pitfalls<br>Welty TE, Luebke A, Gidal BE<br>Epilepsy Currents 2014<br>14(5):250-252 doi:10.5698/1535-7597-14.5.250                                                                                                                                                                              | Pubmed<br>Scopus<br>Web of Science | Discard<br>Reasons:<br>Not of interest |
| 130. | Cannabidiol: State of the art and new challenges for therapeutic applications<br>Pisanti S, Malfitano AM <sup>2</sup> , Ciaglia E, Lamberti A, Ranieri R, Cuomo G, Abate M, Faggiana G, Proto MC, Fiore D, Laezza C, Bifulco M<br>Pharmacology and Therapeutics 2017<br>175:133-150 doi:10.1016/j.pharmthera.2017.02.041 | Scopus<br>Web of Science           | Discard<br>Reasons:<br>Not of interest |
| 131. | Cannabidiol-Delta (9)-tetrahydrocannabinol interactions on acute pain and locomotor activity.<br>Britch SC, Wiley JL, Yu ZH, Clowers BH, Craft RM<br>Drug and Alcohol Dependence 2017<br>175: 187-197 doi: 10.1016/j.drugalcdep.2017.01.046                                                                              | Web of Science                     | Discard<br>Reasons:<br>Not of interest |
| 132. | Cannabidiol-induced myeloid-derived suppressor cells ameliorate experimental autoimmune encephalomyelitis through microRNA regulation.<br>Elliott DM, Nagarkatti P, Nagarkatti M<br>Journal of Neuroimmune Pharmacology 2015<br>10: S68-S69 Supplement: 2 doi: 10.1007/s11481-015-9596-y                                 | Web of Science                     | Discard<br>Not of interest             |
| 133. | Cannabinoid 1 (CB1) receptor - pharmacology, role in pain and recent developments in emerging CB1 agonists<br>Talwar R, Potluri VK<br>CNS and Neurological Disorders - Drug Targets 2011                                                                                                                                 | Scopus                             | Discard<br>Reasons:<br>Not of interest |

|      |                                                                                                                                                                                                                                             |                                    |                                        |
|------|---------------------------------------------------------------------------------------------------------------------------------------------------------------------------------------------------------------------------------------------|------------------------------------|----------------------------------------|
|      | 10(5):536-544 doi:10.2174/187152711796235005                                                                                                                                                                                                |                                    |                                        |
| 134. | Cannabinoid Buccal Spray for Chronic Non-Cancer or Neuropathic Pain: A Review of Clinical Effectiveness, Safety, and Guidelines [Internet].<br>No authors listed<br>Ottawa (ON): Canadian Agency for Drugs and Technologies in Health 2016  | Pubmed                             | Discard<br>Reasons:<br>Not of interest |
| 135. | Cannabinoid CB 2 receptors in human brain inflammation<br>Benito C,Tolón RM, Pazos MR,Núñez E, Castillo AI, Romero J<br>British Journal of Pharmacology 2008<br>153(2):277-285 doi:10.1038/sj.bjp.0707505                                   | Scopus                             | Discard<br>Reasons:<br>Not of interest |
| 136. | Cannabinoid CB1 and CB2 receptor ligand specificity and the development of CB2-selective agonists<br>Ashton JC, Wright JL, McPartland JM,Tyndall JDA<br>Current Medicinal Chemistry 2008<br>15(14):1428-1443 doi:10.2174/092986708784567716 | Scopus                             | Discard<br>Reasons:<br>Not of interest |
| 137. | Cannabinoid control of neuroinflammation related to multiple sclerosis.<br>Baker D, Jackson SJ, Pryce G<br>British Journal of Pharmacology 2007<br>152(5): 649-654 doi: 10.1038/sj.bjp.0707458                                              | Scopus<br>Web of Science           | Discard<br>Reasons:<br>Review          |
| 138. | Cannabinoid delivery systems for pain and inflammation treatment<br>Bruni N, Della Peppa C, Oliaro-Bosso S, Pessione E, Gastaldi D, Dosio F<br>Molecules 2018<br>23(10):2493 doi:10.3390/molecules23102478                                  | Pubmed<br>Scopus<br>Web of Science | Discard<br>Reasons:<br>Not of interest |
| 139. | Cannabinoid drugs and enhancement of endocannabinoid responses: Strategies for a wide array of disease states<br>Karanian DA, Bahr BA<br>Current Molecular Medicine 2006<br>6(6):677-684 doi:10.2174/156652406778194991                     | Scopus                             | Discard<br>Reasons:<br>Not of interest |
| 140. | Cannabinoid drugs for neurological diseases: What is behind? [Fármacos cannabinoides para las enfermedades neurológicas: ¿qué hay detrás?<br>Fernández-Ruiz J<br>Revista de Neurologia 2012<br>54(10):613-628                               | Scopus                             | Discard<br>Reasons:<br>Not of interest |
| 141. | Cannabinoid modulation of neuroinflammatory disorders<br>Saito VM, Rezende RM, Teixeira AL<br>Current Neuropharmacology 2012<br>10(2):159-166 doi:10.2174/157015912800604515                                                                | Scopus                             | Discard<br>Reasons:<br>Not of interest |
| 142. | Cannabinoid pharmacology in cancer research: A new hope for cancer patients?                                                                                                                                                                | Scopus                             | Discard                                |

|      |                                                                                                                                                                                                                                                            |                                    |                                        |
|------|------------------------------------------------------------------------------------------------------------------------------------------------------------------------------------------------------------------------------------------------------------|------------------------------------|----------------------------------------|
|      | Javid FA, Phillips RM, Afshinjavid S, Verde R, Ligresti A<br>European Journal of Pharmacology 2016<br>775(15):1-14 doi:10.1016/j.ejphar.2016.02.010                                                                                                        |                                    | Reasons:<br>Not of interest            |
| 143. | Cannabinoid pharmacology: The first 66 years<br>Pertwee RG<br>British Journal of Pharmacology 2006<br>147 SUPPL. 1 S163-S171 doi:10.1038/sj.bjp.0706406                                                                                                    | Scopus                             | Discard<br>Reasons:<br>Not of interest |
| 144. | Cannabinoid receptor 2: Potential role in immunomodulation and neuroinflammation<br>Rom S, Persidsky Y<br>Journal of Neuroimmune Pharmacology 2013<br>8(3):608-620 doi:10.1007/s11481-013-9445-9                                                           | Scopus                             | Discard<br>Reasons:<br>Not of interest |
| 145. | Cannabinoid receptors as new targets of antifibrosing strategies during chronic liver diseases<br>Mallat A, Teixeira-Clerc F, Deveaux V, <u>Lotersztajn S</u><br>Expert Opinion on Therapeutic Targets 2007<br>11(3):403-409 doi:10.1517/14728222.11.3.403 | Scopus                             | Discard<br>Reasons:<br>Not of interest |
| 146. | Cannabinoid signaling in glial cells in health and disease<br>Witting A, Stella N<br>Current Neuropharmacology 2002<br>2(1):115-124 doi:10.2174/1570159043476855                                                                                           | Scopus                             | Discard<br>Reasons:<br>Not of interest |
| 147. | Cannabinoid therapeutics: High hopes for the future<br>Hensen B<br>Drug Discovery Today 2005<br>10(7):459-462 doi:10.1016/S1359-6446(05)03417-3                                                                                                            | Scopus                             | Discard<br>Reasons:<br>Not of interest |
| 148. | Cannabinoid therapy in practice [Cannabinoidtherapie in der Praxis]<br>Rasche T, Emmert D, Stieber C, Mücke M, Conrad R.<br>Urologe 2018<br>57(5):558-562 doi:10.1007/s00120-018-0636-0                                                                    | Pubmed<br>Scopus<br>Web of Science | Discard<br>Reasons:<br>Not of interest |
| 149. | Cannabinoid-based drugs as anti-inflammatory therapeutics<br>Klein TW<br>Nature Reviews Immunology ,2005<br>5(5):400-411 doi:10.1038/nri1602                                                                                                               | Scopus                             | Discard<br>Reasons:<br>Not of interest |
| 150. | Cannabinoid-based medicines for neurological disorders - Clinical evidence<br>Wright S<br>Molecular Neurobiology 2007<br>36(1):129-136 doi:10.1007/s12035-007-0003-4                                                                                       | Scopus<br>Web of Science           | Discard<br>Reasons:<br>Not of interest |
| 151. | Cannabinoid-induced apoptosis in immune cells as a pathway to immunosuppression                                                                                                                                                                            | Scopus                             | Discard                                |

|      |                                                                                                                                                                                                                                                                                                                                                                             |                                    |                                        |
|------|-----------------------------------------------------------------------------------------------------------------------------------------------------------------------------------------------------------------------------------------------------------------------------------------------------------------------------------------------------------------------------|------------------------------------|----------------------------------------|
|      | Rieder SA, Chauhan A, Singh U, Nagarkatti M, Ngarkatti P<br>Immunobiology 2010<br>215(8):598-605 doi:10.1016/j.imbio.2009.04.001                                                                                                                                                                                                                                            | Web of Science                     | Reasons:<br>Not of interest            |
| 152. | Cannabinoid-induced effects on the nociceptive system: a neurophysiological study in patients with secondary progressive multiple sclerosis<br>Conte A, Bettolo CM, Onesti E, Frasca V, Iacovelli E, Gilio F, Giacomelli E, Gabriele M, Aragona M, Tomassini V, Pantano P, Pozzilli C, Inghilleri M.<br>Eur J Pain. 2009<br>13(5):472-7. doi: 10.1016/j.ejpain.2008.05.014. | Pubmed<br>Scopus<br>Web of Science | Discard<br>Reasons:<br>Not of interest |
| 153. | Cannabinoids against pain. Efficacy and strategies to reduce psychoactivity: A clinical perspective<br>Expert Opinion on Investigational Drugs 2009<br>18(2):125-133 doi:10.1517/13543780802691951                                                                                                                                                                          | Scopus<br>Web of Science           | Discard<br>Reasons:<br>Not of interest |
| 154. | Cannabinoids and cancer: Pros and cons of an antitumour strategy<br>Bifulco M, Laezza C, Pisanti S, Gazerro P<br>British Journal of Pharmacology 2006<br>148(2):123-135 doi:10.1038/sj.bjp.0706632                                                                                                                                                                          | Scopus                             | Discard<br>Reasons:<br>Not of interest |
| 155. | Cannabinoids and hallucinogens for headache<br>McGenney BE<br>Headache 2013<br>53(3):447-458 doi:10.1111/head.12025                                                                                                                                                                                                                                                         | Scopus                             | Discard<br>Reasons:<br>Not of interest |
| 156. | Cannabinoids and neurodegenerative diseases<br>Romero J, Orgado JM<br>CNS and Neurological Disorders - Drug Targets 2009<br>8(6):440-450 doi:10.2174/187152709789824589                                                                                                                                                                                                     | Scopus                             | Discard<br>Reasons:<br>Not of interest |
| 157. | Cannabinoids and neuroinflammation<br>Walter L, Stella N<br>British Journal of Pharmacology 2004<br>141(5):775-785 doi:10.1038/sj.bjp.0705667                                                                                                                                                                                                                               | Scopus                             | Discard<br>Reasons:<br>Not of interest |
| 158. | Cannabinoids and neuroprotection in CNS inflammatory disease<br>Jackson SJ, Diemel LT, Pryce G, Baker D<br>Journal of the Neurological Sciences 2005<br>233(1-2):21-25 doi:10.1016/j.jns.2005.03.002                                                                                                                                                                        | Scopus                             | Discard<br>Reasons:<br>Not of interest |
| 159. | Cannabinoids and neuroprotection in motor-related disorders<br>De Lago E, Fernández-Ruiz J<br>CNS and Neurological Disorders - Drug Targets 2007<br>6(6):377-387 doi:10.2174/187152707783399210                                                                                                                                                                             | Scopus                             | Discard<br>Reasons:<br>Not of interest |

|      |                                                                                                                                                                                                                                       |                                    |                                        |
|------|---------------------------------------------------------------------------------------------------------------------------------------------------------------------------------------------------------------------------------------|------------------------------------|----------------------------------------|
| 160. | Cannabinoids and the brain<br>Parker LA<br>Cannabinoids and the Brain 2017<br>1(237):5                                                                                                                                                | Scopus                             | Discard<br>Reasons:<br>Not of interest |
| 161. | Cannabinoids and the expanded endocannabinoid system in neurological disorders<br>Cristino L, Bisogno T, Di Marzo V.<br>Nat Rev Neurol. 2020<br>6(1):9-29. doi: 10.1038/s41582-019-0284-z.                                            | Pubmed<br>Scopus<br>Web of Science | Discard<br>Reasons:<br>Not of interest |
| 162. | Cannabinoids and the immune system: An overview<br>Tanasescu R, Constantinescu CS<br>Immunobiology 2010<br>215(8):588-597 doi:10.1016/j.imbio.2009.12.005                                                                             | Scopus                             | Discard<br>Reasons:<br>Not of interest |
| 163. | Cannabinoids and the immune system: Potential for the treatment of inflammatory diseases?<br>Croxford JL, Yamamura T<br>Journal of Neuroimmunology 2005<br>166(1-2):3-18 doi:10.1016/j.jneuroim.2005.04.023                           | Scopus                             | Discard<br>Reasons:<br>Not of interest |
| 164. | Cannabinoids as modulators of cell death: Clinical applications and future directions<br>Fonseca BM, Teixeira NA, Correia-da-Silva G<br>Reviews of Physiology, Biochemistry and Pharmacology 2017<br>173:63-88 doi:10.1007/112_2017_3 | Scopus                             | Discard<br>Reasons:<br>Not of interest |
| 165. | Cannabinoids as novel anti-inflammatory drugs<br>Nagarkatti P, Pandey R, Rieder SA, Hedge VL, Nagarkatti M<br>Future Medicinal Chemistry 2009<br>1(7):1333-1349 doi:10.4155/fmc.09.93                                                 | Scopus                             | Discard<br>Reasons:<br>Not of interest |
| 166. | Cannabinoids as pharmacotherapies for neuropathic pain: from the bench to the bedside.<br>Rahn EJ, Hohmann AG<br>Neurotherapeutics. 2009<br>6(4):713-37. doi: 10.1016/j.nurt.2009.08.002                                              | Pubmed<br>Scopus<br>Web of Science | Discard<br>Reasons:<br>Not of interest |
| 167. | Cannabinoids as therapeutic agents for ablating neuroinflammatory disease<br>Cabral GA, Griffin-Thomas L<br>Endocrine, Metabolic and Immune Disorders - Drug Targets 2008<br>8(3):159-172 doi:10.2174/187153008785700118              | Scopus                             | Discard<br>Reasons:<br>Not of interest |
| 168. | Cannabinoids decrease the Th17 inflammatory autoimmune phenotype<br>Kozela E, Juknat A, Kaushansky N, Rimmerman N, Ben-Nun A, Vogel Z<br>Journal of Neuroimmune Pharmacology 2013<br>8(5):1265-1276 doi:10.1007/s11481-013-9493-1     | Pubmed<br>Scopus<br>Web of Science | Keep                                   |

|      |                                                                                                                                                                                                                                                                                                                                                                                                   |                                    |                                        |
|------|---------------------------------------------------------------------------------------------------------------------------------------------------------------------------------------------------------------------------------------------------------------------------------------------------------------------------------------------------------------------------------------------------|------------------------------------|----------------------------------------|
| 169. | Cannabinoids for Epilepsy - Real Data, at Last<br>Berkovic SF<br>New England Journal of Medicine 2017<br>376(21):2075-2076 doi:10.1056/NEJMe1702205                                                                                                                                                                                                                                               | Scopus                             | Discard<br>Reasons:<br>Not of interest |
| 170. | Cannabinoids for medical use: A systematic review and meta-analysis<br>Whiting PF, Wolff RF, Deshpande S, Di Nisio M, Duffy S, Hernandez AV, Keurentjes JC, Lang S, Misso K, Ryder S, Schmidtko S, Westwood M, Kleijnen J<br>JAMA - Journal of the American Medical Association 2015<br>313(24):2456-2473 doi:10.1001/jama.2015.6358                                                              | Scopus                             | Discard<br>Reasons:<br>Not of interest |
| 171. | Cannabinoids for pediatric epilepsy? Up in smoke or real science?<br>Filloux FM<br>Translational Pediatrics 2015<br>4(4):271-282 doi: 10.3978/j.issn.2224-4336.2015.10.03                                                                                                                                                                                                                         | Web of Science                     | Discard<br>Reasons:<br>Not of interest |
| 172. | Cannabinoids for spasticity due to multiple sclerosis or paraplegia: A systematic review and meta-analysis of randomized clinical trials<br>da Rovare PV, Magalhães GPA, Jardini GDA, Beraldo ML, Gameiro MO, Agarwal A, Luvizutto GJ, Paula-Ramos L, Camargo SEA, Dias de Oliveira L, Bazan R, El Dib R<br>Complementary Therapies in Medicine 2017<br>34:170-185 doi:10.1016/j.ctim.2017.08.010 | Scopus                             | Discard<br>Reasons:<br>Not of interest |
| 173. | Cannabinoids for symptomatic therapy of multiple sclerosis.<br>Husseini L, Leussink VI, Warnke C, Hartung HP, Kieseier BC.<br>Nervenarzt. 2012<br>83(6):695-704. doi: 10.1007/s00115-011-3401-9.                                                                                                                                                                                                  | Pubmed<br>Scopus<br>Web of Science | Discard<br>Reasons:<br>Not of interest |
| 174. | Cannabinoids for the pharmaceutical industry.<br>Stott CG, Guy GW<br>Euphytica 2004<br>140(1-2):83-93 doi: 10.1007/s10681-004-4757-8                                                                                                                                                                                                                                                              | Web of Science                     | Discard<br>Reasons:<br>Not of interest |
| 175. | Cannabinoids for the treatment of mental disorders and symptoms of mental disorders: a systematic review and meta-analysis<br>Black N, Stockings E, Campbell G, Tran LT, Zagic D, Hall WD, Farrell M, Degenhardt L.<br>Lancet Psychiatry. 2019<br>6(12):995-1010. doi: 10.1016/S2215-0366(19)30401-8.                                                                                             | Scopus<br>Web of Science           | Discard<br>Reasons:<br>Not of interest |
| 176. | Cannabinoids for the treatment of neuropathic pain: Clinical evidence.<br>Ashton JC, Milligan ED<br>Curr Opin Investig Drugs 2008<br>9(1): 65-75                                                                                                                                                                                                                                                  | Web of Science                     | Discard<br>Reasons:<br>Not of interest |

|      |                                                                                                                                                                                                                                                                                            |                                    |                                        |
|------|--------------------------------------------------------------------------------------------------------------------------------------------------------------------------------------------------------------------------------------------------------------------------------------------|------------------------------------|----------------------------------------|
| 177. | Cannabinoids for the treatment of spasticity.<br>Nielsen S, Murnion B, Campbell G, Young H, Hall W<br>DEVELOPMENTAL MEDICINE AND CHILD NEUROLOGY 2019<br>61(6):631 doi: 10.1111/dmcn.14165                                                                                                 | Web of Science                     | Discard<br>Reasons:<br>Not of interest |
| 178. | Cannabinoids for Treatment of MS Symptoms: State of the Evidence<br>Rice J, Cameron MH<br>Current Neurology and Neuroscience Reports 2017<br>18(8) doi:10.1007/s11910-018-0859-x                                                                                                           | Pubmed<br>Scopus<br>Web of Science | Discard<br>Reasons:<br>Not of interest |
| 179. | Cannabinoids for treatment of spasticity and other symptoms related to multiple sclerosis (CAMS study): multicentre randomised placebo-controlled trial<br>Zajicek J, Fox P, Sanders H, Wright D, Vickery J, Nunn A, Thompson A, UK MS Research Group<br>Lancet. 2003<br>362(9395):1517-26 | Pubmed                             | Discard<br>Reasons:<br>Not of interest |
| 180. | Cannabinoids in (cancer) pain [Cannabinoide bei (Tumor-)Schmerzen]<br>Karst M<br>Deutsche Zeitschrift für Onkologie 2011<br>41:150-153 doi:10.1055/s-0030-1257697                                                                                                                          | Scopus                             | Discard<br>Reasons:<br>Not of interest |
| 181. | Cannabinoids in anaesthesia and pain therapy<br>Azad S, Rammes G<br>Current Opinion in Anaesthesiology 2005<br>18(4):424-427 doi:10.1097/01.aco.0000174959.05383.9c                                                                                                                        | Scopus                             | Discard<br>Reasons:<br>Not of interest |
| 182. | Cannabinoids in bipolar affective disorder: a review and discussion of their therapeutic potential.<br>Ashton CH, Moore PB, Gallagher P, Young AH<br>JOURNAL OF PSYCHOPHARMACOLOGY 2005<br>19(3): 293-300 DOI: 10.1177/0269881105051541                                                    | Web of Science                     | Discard<br>Reasons:<br>Not of interest |
| 183. | Cannabinoids in chronic pain and palliative care [Uso de canabinóides na dor crônica e em cuidados paliativos]<br>Bonfá L, de Oliveira Vinagre C, de Figueiredo NV<br>Revista Brasileira de Anestesiologia 2008<br>58(3):267-279 doi:10.1590/S0034-70942008000300010                       | Scopus                             | Discard<br>Reasons:<br>Not of interest |
| 184. | Cannabinoids in clinical practice<br>Williamson EM, Evans FJ<br>Drugs 2000<br>60(6):1303-1314 doi:10.2165/00003495-200060060-00005                                                                                                                                                         | Pubmed<br>Scopus<br>Web of Science | Discard<br>Reasons:<br>Not of interest |
| 185. | Cannabinoids in clinical practice                                                                                                                                                                                                                                                          | Scopus                             | Discard                                |



|      |                                                                                                                                                                                                                                                                                                                                                                                        |                                    |                                        |
|------|----------------------------------------------------------------------------------------------------------------------------------------------------------------------------------------------------------------------------------------------------------------------------------------------------------------------------------------------------------------------------------------|------------------------------------|----------------------------------------|
|      | Koustoudi S, Koutousi C, <u>Mironidou-Tzouveleki M</u><br>Epitheorese Klinikes Farmakologias kai Farmakokinetikes 2005<br>23(3):265-272                                                                                                                                                                                                                                                |                                    | Reasons:<br>Not of interest            |
| 186. | Cannabinoids in health and disease<br>Kogan NM, Mechoulam R<br>Dialogues in Clinical Neuroscience 2007<br>9(4):413-430                                                                                                                                                                                                                                                                 | Scopus                             | Discard<br>Reasons:<br>Not of interest |
| 187. | Cannabinoids in medicine: A review of their therapeutic potential<br>Amar MB<br>Journal of Ethnopharmacology 2006<br>105(1-2):1-25 doi:10.1016/j.jep.2006.02.001                                                                                                                                                                                                                       | Scopus                             | Discard<br>Reasons:<br>Not of interest |
| 188. | Cannabinoids in MS - Are we any closer to knowing how best to use them?<br>Bowling A<br>Multiple Sclerosis 2006<br>12(5):523-525 doi:10.1177/1352458506072514                                                                                                                                                                                                                          | Scopus                             | Discard<br>Reasons:<br>Not of interest |
| 189. | Cannabinoids in multiple sclerosis: A neurophysiological analysis<br>Vecchio D, Varrasi C, Virgilio E, Spagarino A, Naldi P, Cantello R.<br>Acta Neurol Scand. 2020<br>00:1-6 doi: 10.1111/ane.13313                                                                                                                                                                                   | Pubmed<br>Scopus                   | Discard<br>Reasons:<br>Not of interest |
| 190. | Cannabinoids in Neurodegenerative Disorders and Stroke/Brain Trauma: From Preclinical Models to Clinical Applications<br>Fernández-Ruiz J, Moro MA, Martínez-Orgado J<br>Neurotherapeutics 2015<br>12(4):793-806 doi:10.1007/s13311-015-0381-7                                                                                                                                         | Scopus                             | Discard<br>Reasons:<br>Not of interest |
| 191. | Cannabinoids in neurology - Brazilian academy of neurology [Canabinoides e seu uso em neurologia - Academia brasileira de neurologia]<br>Brucki SM, Frota NA, Schestatsky P, Souza AH, Carvalho VN, Manreza ML, Mendes MF, Comini-Frota E, Vasconcelos C, Tumas V, Ferraz HB, Barbosa E, Jurno ME<br>Arquivos de Neuro-Psiquiatria 2015<br>73(4):371-374 doi:10.1590/0004-282X20150041 | Pubmed<br>Scopus<br>Web of Science | Discard<br>Reasons:<br>Not of interest |
| 192. | Cannabinoids in pain medicine [Cannabinoide in der schmerztherapie]<br>Briner A, Schneider T<br>Therapeutische Umschau 2017<br>74(5):261-266 doi:10.1024/0040-5930/a000913                                                                                                                                                                                                             | Scopus<br>Web of Science           | Discard<br>Reasons:<br>Not of interest |
| 193. | Cannabinoids in Palliative Medicine<br>Strouse TB<br>Journal of Palliative Medicine 2017                                                                                                                                                                                                                                                                                               | Scopus                             | Discard<br>Reasons:<br>Not of interest |

|      |                                                                                                                                                                                                                                                                                                                                                 |                                    |                                        |
|------|-------------------------------------------------------------------------------------------------------------------------------------------------------------------------------------------------------------------------------------------------------------------------------------------------------------------------------------------------|------------------------------------|----------------------------------------|
|      | 20(7):692-694 doi:10.1089/jpm.2017.0197                                                                                                                                                                                                                                                                                                         |                                    |                                        |
| 194. | Cannabinoids in the management of difficult to treat pain<br>Russo EB<br>Therapeutics and Clinical Risk Management 2008<br>4(1):245-259                                                                                                                                                                                                         | Pubmed<br>Scopus                   | Discard<br>Reasons:<br>Not of interest |
| 195. | Cannabinoids in the treatment of epilepsy<br>Friedman D, Devinsky O<br>New England Journal of Medicine 2015<br>373(11):1048-1058 doi:10.1056/NEJMr1407304                                                                                                                                                                                       | Scopus                             | Discard<br>Reasons:<br>Not of interest |
| 196. | Cannabinoids in the treatment of pain and spasticity in multiple sclerosis<br>Smith PF<br>Current Opinion in Investigational Drugs 2002<br>3(6):859-864                                                                                                                                                                                         | Scopus                             | Discard<br>Reasons:<br>Not of interest |
| 197. | Cannabinoids Part I - Legal policies and physiological effects<br>Kerwin J<br>Drug Testing and Analysis 2013<br>5(1):20-21 doi:10.1002/dta.1440                                                                                                                                                                                                 | Scopus                             | Discard<br>Reasons:<br>Not of interest |
| 198. | Cannabinoids quantification in medicinal cannabis extracts by high performance liquid chromatography [Quantificação de canabinoides em extratos medicinais de cannabis por cromatografia líquida de alta eficiência]<br>Carvalho VM, Aguiara AFL, Barattob LC, Souza FLC, Rocha ED<br>Quím. Nova 2020<br>43(1) doi: 10.21577/0100-4042.20170457 | Scopus<br>Web of Science           | Discard<br>Reasons:<br>Not of interest |
| 199. | Cannabinoids therapeutic use: what is our current understanding following the introduction of THC, THC:CBD oromucosal spray and others?<br>Maccarrone M, Maldonado R, Casas M, Henze T, Centonze D.<br>Expert Rev Clin Pharmacol. 2017<br>10(4):443-455. doi: 10.1080/17512433.2017.1292849.                                                    | Pubmed<br>Scopus<br>Web of Science | Discard<br>Reasons:<br>Not of interest |
| 200. | Cannabinoids, endocannabinoids, and related analogs in inflammation<br>Burstein S, Zurier RB<br>AAPS Journal 2009<br>11(1):109-119 doi:10.1208/s12248-009-9084-5                                                                                                                                                                                | Scopus                             | Discard<br>Reasons:<br>Not of interest |
| 201. | Cannabinoids, inflammation, and fibrosis.<br>Zurier RB, Burstein SH<br>Faseb Journal 2016<br>30(11): 3682-3689 doi: 10.1096/fj.201600646R                                                                                                                                                                                                       | Web of Science                     | Discard<br>Reasons:<br>Not of interest |
| 202. | Cannabinoids, multiple sclerosis and neuroprotection                                                                                                                                                                                                                                                                                            | Scopus                             | Discard                                |

|      |                                                                                                                                                                                             |                                    |                                        |
|------|---------------------------------------------------------------------------------------------------------------------------------------------------------------------------------------------|------------------------------------|----------------------------------------|
|      | De Lago E, Gómez-Ruiz M, Moreno-Martet M, Fernández-Ruiz J<br>Expert Review of Clinical Pharmacology 2009<br>2(6):645-660 doi:10.1586/ecp.09.42                                             |                                    | Reasons:<br>Not of interest            |
| 203. | Cannabinoids<br>Howard P, Twycross R, Shuster J, Mihalyo M, Wilcock A<br>Journal of Pain and Symptom Management 2013<br>46(1):142-149 doi:10.1016/j.jpainsymman.2013.05.002                 | Scopus<br>Web of Science           | Discard<br>Reasons:<br>Not of interest |
| 204. | Cannabinoids: Between neuroprotection and neurotoxicity<br>Sarne Y, Mechoulam R<br>Current Drug Targets: CNS and Neurological Disorders 2005<br>4(6):677-684 doi:10.2174/156800705774933005 | Scopus                             | Discard<br>Reasons:<br>Not of interest |
| 205. | Cannabinoids: From plant to patient<br>Barnes F<br>Pharmaceutical Journal 2001<br>266:7143                                                                                                  | Scopus                             | Discard<br>Reasons:<br>Not of interest |
| 206. | Cannabinoids: Mechanisms and therapeutic applications in the CNS<br>Drysdale AJ, Platt B<br>Current Medicinal Chemistry 2003<br>10(24):2719-2732 doi:10.2174/0929867033456387               | Scopus                             | Discard<br>Reasons:<br>Not of interest |
| 207. | Cannabinoids: Medical implications<br>Schrot RJ, Hubbard JR<br>Annals of Medicine 2016<br>48(3):128-141 doi:10.3109/07853890.2016.1145794                                                   | Pubmed<br>Scopus<br>Web of Science | Discard<br>Reasons:<br>Not of interest |
| 208. | Cannabinoids: novel medicines for the treatment of Huntington's disease<br>Sagredo O, Pazos MR, Valdeolivas S, Fernandez-Ruiz J.<br>Recent Pat CNS Drug Discov. 2012<br>7(1):41-8           | Pubmed<br>Scopus                   | Discard<br>Reasons:<br>Not of interest |
| 209. | Cannabinoids: Occurrence and medicinal chemistry<br>Appendino G, Chianese G, Tagliatela-Scafato O<br>Current Medicinal Chemistry 2011<br>18(7):1085-1099 doi:10.2174/092986711794940888     | Scopus<br>Web of Science           | Discard<br>Reasons:<br>Not of interest |
| 210. | Cannabinoids: Potential targets for bladder dysfunction<br>Ruggieri MR<br>Handbook of Experimental Pharmacology 2011<br>202:425-451 doi:10.1007/978-3-642-16499-6_20                        | Scopus                             | Discard<br>Reasons:<br>Not of interest |
| 211. | Cannabinoids: Their role in pain and palliation<br>McCarberg BH                                                                                                                             | Scopus                             | Discard<br>Reasons:                    |

|      |                                                                                                                                                                                                                                                                                                                                                                  |                  |                                        |
|------|------------------------------------------------------------------------------------------------------------------------------------------------------------------------------------------------------------------------------------------------------------------------------------------------------------------------------------------------------------------|------------------|----------------------------------------|
|      | Journal of Pain and Palliative Care Pharmacotherapy 2007<br>21(3)19-28 doi:10.1300/J354v21n03_04                                                                                                                                                                                                                                                                 |                  | Not of interest                        |
| 212. | Cannabis - medicinal use. [Cannabis: Nicht nur Suchtmittel, sondern auch Medikament.]<br>Deutsche medizinische Wochenschrift (1946) 2014<br>139(3):74-75 doi:10.1055/s-0033-1353961                                                                                                                                                                              | Pubmed<br>Scopus | Discard<br>Reasons:<br>Not of interest |
| 213. | Cannabis - The therapeutic potential<br>Gray C<br>Pharmaceutical Journal 1995<br>254(6843):771-773                                                                                                                                                                                                                                                               | Scopus           | Discard<br>Reasons:<br>Not of interest |
| 214. | Cannabis and analgesia [Cannabis et analgésie]<br>Benyamina A, Blecha L<br>Douleur et Analgesie 2012<br>25(2):78-82 doi: 10.1007/s11724-012-0294-8                                                                                                                                                                                                               | Scopus           | Discard<br>Reasons:<br>Not of interest |
| 215. | Cannabis and cancer: Reality or pipe dream?<br>Catchart P, de Giorgio A, Stebbing J<br>The Lancet Oncology 2015<br>16(13):1291-1292 doi:10.1016/S1470-2045(15)00302-2                                                                                                                                                                                            | Scopus           | Discard<br>Reasons:<br>Not of interest |
| 216. | Cannabis and Cannabinoids for MS Symptoms<br>Goss AL, Cameron M<br>Annals of Neurology 2020<br>87(6) doi: 10.1002/ana.25750                                                                                                                                                                                                                                      | Scopus           | Discard<br>Reasons:<br>Not of interest |
| 217. | Cannabis and cannabinoids for the treatment of people with chronic noncancer pain conditions: A systematic review and meta-analysis of controlled and observational studies<br>Stockings E, Campbell G, Hall WD, Nielsen S, Zagic D, Rahman R, Murnion B, Farrell M, Weier M, Degenhardt L<br>Pain 2018<br>159(10):1932-1954 doi:10.1097/j.pain.0000000000001293 | Scopus           | Discard<br>Reasons:<br>Not of interest |
| 218. | Cannabis and cannabinoids in medicine [Cannabis et cannabinoïdes en médecine]<br>Girault L<br>Actualites Pharmaceutiques 2009<br>48(486):19-25 doi:10.1016/S0515-3700(09)70463-X                                                                                                                                                                                 | Scopus           | Discard<br>Reasons:<br>Not of interest |
| 219. | Cannabis and cannabinoids in the treatment of neuropathic pain [Cannabis y cannabinoides en el tratamiento del dolor neuropático]<br>Dolor 2005<br>20(4):213-216                                                                                                                                                                                                 | Scopus           | Discard<br>Reasons:<br>Not of interest |
| 220. | Cannabis and cannabinoids<br>No authors listed                                                                                                                                                                                                                                                                                                                   | Scopus           | Discard<br>Reasons:                    |

|      |                                                                                                                                                                                                                                                                      |                                    |                                        |
|------|----------------------------------------------------------------------------------------------------------------------------------------------------------------------------------------------------------------------------------------------------------------------|------------------------------------|----------------------------------------|
|      | JAMA - Journal of the American Medical Association 2016<br>316(22):2424-2425 doi:10.1001/jama.2016.11772                                                                                                                                                             |                                    | Not of interest                        |
| 221. | Cannabis and cannabinoids.<br>[No authors listed]<br>Med Lett Drugs Ther. 2019<br>61(1585):179-182. No abstract available.                                                                                                                                           | Pubmed<br>Scopus                   | Discard<br>Reasons:<br>Not of interest |
| 222. | Cannabis and cannabinoids-easier access, hype and disappointment: What has been confirmed in therapy?<br>Rasche T, Emmert D, Stieber C, Conrad R, Mücke M.<br>Internist (Berl). 2019<br>60(3):309-314. doi: 10.1007/s00108-019-0556-0.                               | Pubmed<br>Scopus<br>Web of Science | Discard<br>Reasons:<br>Not of interest |
| 223. | Cannabis and Cannabis based medicine extracts: Additional results<br>Russo E<br>Journal of Cannabis Therapeutics 2003<br>3(4):153-161 doi:10.1300/J175v03n04_03                                                                                                      | Scopus                             | Discard<br>Reasons:<br>Not of interest |
| 224. | Cannabis and endocannabinoid modulators: Therapeutic promises and challenges<br>Grant I, Cahn BR<br>Clinical Neuroscience Research 2005<br>5(2-4):185-199 doi:10.1016/j.cnr.2005.08.015                                                                              | Scopus                             | Discard<br>Reasons:<br>Not of interest |
| 225. | Cannabis and endocannabinoid signaling in Epilepsy<br>Katona I<br>Handbook of Experimental Pharmacology 2015<br>231:285-316 doi:10.1007/978-3-319-20825-1_10                                                                                                         | Scopus                             | Discard<br>Reasons:<br>Not of interest |
| 226. | Cannabis and endocannabinoids: 'The old man and the teenagers'<br>Lambert DM<br>Chemistry and Biodiversity 2007<br>4(8):1609-1613 doi:10.1002/cbdv.200790143                                                                                                         | Scopus                             | Discard<br>Reasons:<br>Not of interest |
| 227. | Cannabis and intractable chronic pain: an explorative retrospective analysis of Italian cohort of 614 patients<br>Fanelli G, De Carolis G, Leonardi C, Longobardi A, Sarli E, Allegri M, Schatman ME.<br>J Pain Res. 2017<br>10:1217-1224. doi: 10.2147/JPR.S132814. | Pubmed<br>Scopus<br>Web of Science | Discard<br>Reasons:<br>Not of interest |
| 228. | Cannabis and multiple sclerosis<br>Fragoso YD, Carra A, Macias MA.<br>Expert Rev Neurother. 2020<br>doi: 10.1080/14737175.2020.1776610                                                                                                                               | Pubmed<br>Scopus<br>Web of Science | Discard<br>Reasons:<br>Not of interest |
| 229. | Cannabis and multiple sclerosis                                                                                                                                                                                                                                      | Pubmed                             | Discard                                |

|      |                                                                                                                                                                                                                                                                                                                                                                             |                                    |                                        |
|------|-----------------------------------------------------------------------------------------------------------------------------------------------------------------------------------------------------------------------------------------------------------------------------------------------------------------------------------------------------------------------------|------------------------------------|----------------------------------------|
|      | Ingram G, Pearson OR.<br>Pract Neurol. 2019<br>19(4):310-315. doi: 10.1136/practneurol-2018-002137.                                                                                                                                                                                                                                                                         | Scopus                             | Reasons:<br>Not of interest            |
| 230. | Cannabis and Neuropsychiatric Disorders: An Updated Review<br>Chayasirisobhon S.<br>Acta Neurol Taiwan. 2019<br>28(2):27-39                                                                                                                                                                                                                                                 | Pubmed<br>Scopus                   | Discard<br>Reasons:<br>Not of interest |
| 231. | Cannabis and pain: A review<br>Journal of Pain Management 2016<br>9(4):395-413                                                                                                                                                                                                                                                                                              | Scopus                             | Discard<br>Reasons:<br>Not of interest |
| 232. | Cannabis and Pediatric Inflammatory Bowel Disease: Change Blossoms a Mile High<br>Hoffenberg EJ, Newman H, Collins C, Tarbell S, Leinwand K<br>Journal of Pediatric Gastroenterology and Nutrition 2017<br>64(2):265-271 doi:10.1097/MPG.0000000000001393                                                                                                                   | Scopus                             | Discard<br>Reasons:<br>Not of interest |
| 233. | Cannabis as a possible treatment for spasticity in multiple sclerosis [Kanabis kao mogućí tretman u lečenju spastičnosti kod multiple skleroze]<br>Vesic K, Dejanovic SD, Borovcanin M, Samardzic J, Toncev G<br>Serbian Journal of Experimental and Clinical Research 2016<br>17(1):61-66 doi:10.1515/SJECR-2015-0047                                                      | Scopus                             | Discard<br>Reasons:<br>Not of interest |
| 234. | Cannabis as a therapeutic agent<br>Notcutt W<br>CPD Anaesthesia 2000<br>2(3):134-139                                                                                                                                                                                                                                                                                        | Scopus                             | Discard<br>Reasons:<br>Not of interest |
| 235. | Cannabis based drug is licensed for spasticity in patients with MS<br>Kmietowicz Z.<br>BMJ. 2010<br>340:c3363. doi: 10.1136/bmj.c3363. No abstract available.                                                                                                                                                                                                               | Pubmed<br>Scopus                   | Discard<br>Reasons:<br>Not of interest |
| 236. | Cannabis derivatives therapy for a seronegative stiff-person syndrome: a case report.<br>Vicente-Valor MI, Garcia-Llopis P, Mejia Andujar L, Antonino de la Camara G, Garc a-a del Busto N, Lopez Tinoco MJ, Quintana Vergara B, Peiro Vilaplana C, Dominguez Moran JA, S nchez Alcaraz A.<br>J Clin Pharm Ther. 2013<br>38(1):71-3. doi: 10.1111/j.1365-2710.2012.01365.x. | Pubmed<br>Scopus<br>Web of Science | Discard<br>Reasons:<br>Not of interest |
| 237. | Cannabis drugs: "Narcotic" on prescription? [Cannabismedikamente: "Rauschgift" auf rezept?]<br>Gross H<br>MMW-Fortschritte der Medizin 2010                                                                                                                                                                                                                                 | Pubmed<br>Scopus                   | Discard<br>Reasons:<br>Not of interest |

|      |                                                                                                                                                                                                                            |                  |                                        |
|------|----------------------------------------------------------------------------------------------------------------------------------------------------------------------------------------------------------------------------|------------------|----------------------------------------|
|      | 152(45):14-15+16                                                                                                                                                                                                           |                  |                                        |
| 238. | Cannabis for Chronic Pain: Challenges and Considerations<br>Romero-Sandoval EA, Fincham JE, Kolano AL, Sharpe BN, Alvarado-Vázquez PA<br>Pharmacotherapy 2018<br>38(6):651-662 doi: 10.1002/phar.2115                      | Scopus           | Discard<br>Reasons:<br>Not of interest |
| 239. | Cannabis for inflammatory bowel disease<br>Naftali T, Mechulam R, Lev LB, Konikoff FM<br>Digestive Diseases ,2014<br>32(4):468-474 doi:10.1159/000358155                                                                   | Scopus           | Discard<br>Reasons:<br>Not of interest |
| 240. | Cannabis for neuropathic pain in multiple sclerosis-high expectations, poor data<br>Rudroff T<br>Frontiers in Pharmacology 2019<br>10:1239 doi:10.3389/fphar.2019.01239                                                    | Scopus           | Discard<br>Reasons:<br>Not of interest |
| 241. | Cannabis for Pain and Headaches: Primer.<br>Kim PS, Fishman MA.<br>Current Pain and Headache Reports 2017<br>21(4):19 DOI: 10.1007/s11916-017-0619-7                                                                       | Web of Science   | Discard<br>Reasons:<br>Not of interest |
| 242. | Cannabis in movement disorders.<br>Muller-Vahl KR, Kolbe H, Schneider U, Emrich HM<br>Forschende Komplementarmedizin 1999<br>6 Suppl 3:23-27 doi: 10.1159/000057153 Supplement: 3                                          | Web of Science   | Discard<br>Reasons:<br>Not of interest |
| 243. | Cannabis in neurology - A potted review<br>Hosking R, Zajicek J<br>Nature Reviews Neurology 2014<br>10(8):429-430 doi:10.1038/nrneurol.2014.122                                                                            | Scopus           | Discard<br>Reasons:<br>Not of interest |
| 244. | Cannabis in New Zealand: Smoking gun or medicalised smokescreen?<br>Newton-Howes G, McBride S<br>New Zealand Medical Journal 2016<br>129(1433):6862                                                                        | Scopus           | Discard<br>Reasons:<br>Not of interest |
| 245. | Cannabis medicines in Norway--the basis for approval<br>Gramstad L, Sagabråten AS.<br>Tidsskr Nor Laegeforen. 2012<br>132(23-24):2598-9. doi: 10.4045/tidsskr.12.1250. Norwegian. No abstract available.                   | Pubmed<br>Scopus | Discard<br>Reasons:<br>Not of interest |
| 246. | Cannabis oral spray effective against pain in multiple sclerosis? [Cannabis-mundspray<br>wirksam gegen schmerzen bei multipler sklerose?]<br>Zeitschrift fur Phytotherapie 2006<br>27(3):123-124 doi:10.1055/s-2006-951380 | Scopus           | Discard<br>Reasons:<br>Not of interest |

|      |                                                                                                                                                                                                                                                                    |                                    |                                        |
|------|--------------------------------------------------------------------------------------------------------------------------------------------------------------------------------------------------------------------------------------------------------------------|------------------------------------|----------------------------------------|
| 247. | Cannabis sativa in the light of scientific research<br>Szulakowska A, Milnerowicz H<br>Advances in Clinical and Experimental Medicine 2007<br>16(6):807-815                                                                                                        | Scopus                             | Discard<br>Reasons:<br>Not of interest |
| 248. | Cannabis Sativa: Getting closer to separating the medicinal properties from the drug of abuse<br>Stella N<br>Journal of Neuroimmunology 2005<br>166(1-2):1-2 doi:10.1016/j.jneuroim.2005.05.005                                                                    | Scopus                             | Discard<br>Reasons:<br>Not of interest |
| 249. | Cannabis sativa: Much more beyond $\Delta^9$ -tetrahydrocannabinol<br>Alves, P., Amaral, C., Teixeira, N., Correia-da-Silva, G<br>Pharmacological Research 2020<br>157 doi: 10.1016/j.phrs.2020.104822                                                             | Scopus<br>Web of Science           | Discard<br>Reasons:<br>Not of interest |
| 250. | Cannabis therapeutics and the future of neurology<br>Russo EB<br>Frontiers in Integrative Neuroscience 2018<br>12:51 doi:10.3389/fnint.2018.00051                                                                                                                  | Pubmed<br>Scopus<br>Web of Science | Discard<br>Reasons:<br>Not of interest |
| 251. | Cannabis, pain, and sleep: lessons from therapeutic clinical trials of Sativex, a cannabis-based medicine<br>Russo EB, Guy GW, Robson PJ.<br>Chem Biodivers. 2007<br>4(8):1729-43                                                                                  | Pubmed<br>Scopus<br>Web of Science | Discard<br>Reasons:<br>Not of interest |
| 252. | Cannabis, the mind and society: The hash realities<br>Murray RM, Morrison PD, Henquet C, Di Forti M<br>Nature Reviews Neuroscience 2007<br>8(11):885-895 doi:10.1038/nrn2253                                                                                       | Scopus                             | Discard<br>Reasons:<br>Not of interest |
| 253. | Cannabis. 1. Effects of cannabinoids on the central nervous system. 2. Interactions with drugs [Cannabis. 1. ZNS-effekte durch cannabinoide. 2. Interaktionen mit arzneimitteln]<br>Bielenberg J<br>Arztezeitschrift fur Naturheilverfahren 2003<br>44(12):907-912 | Scopus                             | Discard<br>Reasons:<br>Not of interest |
| 254. | Cannabis: A neurological remedy or a drug of abuse in India<br>Biswas P, Mishra P, Bose D, Durgbanshi A<br>CNS and Neurological Disorders - Drug Targets 2017<br>16(5):576-584 doi:10.2174/1871527316666170424115008                                               | Scopus                             | Discard<br>Reasons:<br>Not of interest |
| 255. | Cannabis: A treasure trove or pandora's box?<br>Solymosi K, Köfalv A                                                                                                                                                                                               | Scopus                             | Discard<br>Reasons:                    |



|      |                                                                                                                                                                                                                                               |                  |                                        |
|------|-----------------------------------------------------------------------------------------------------------------------------------------------------------------------------------------------------------------------------------------------|------------------|----------------------------------------|
|      | Mini-Reviews in Medicinal Chemistry 2017<br>17(13):1223-1291 doi:10.2174/1389557516666161004162133                                                                                                                                            |                  | Not of interest                        |
| 256. | Cannabis: An overview of its adverse acute and chronic effects and its implications<br>Current Drug Abuse Reviews 2017<br>10(1):6-18 doi:10.2174/1874473710666170712113042                                                                    | Scopus           | Discard<br>Reasons:<br>Not of interest |
| 257. | Cannabis: Old medicine with new promise for neurological disorders<br>Current Opinion in Investigational Drugs 2002<br>3(3):437-440                                                                                                           | Scopus           | Discard<br>Reasons:<br>Not of interest |
| 258. | Cannabis: The never-ending, nefarious nepenthe of the 21st century: What should the clinician know?<br>Greydanus DE, Kaplan G, Baxter Sr LE, Patel DR, Feucht CL<br>Disease-a-Month 2015<br>61(4):118-175 doi:10.1016/j.disamonth.2015.01.004 | Scopus           | Discard<br>Reasons:<br>Not of interest |
| 259. | Cannabis; Adverse effects from an oromucosal spray<br>Scully C<br>British Dental Journal 2007<br>203(6):13 doi:10.1038/bdj.2007.749                                                                                                           | Pubmed<br>Scopus | Discard<br>Reasons:<br>Not of interest |
| 260. | Cannabis-based medicines - GW Pharmaceuticals. High CBD, high THC, medicinal cannabis - GW Pharmaceuticals, THC:CBD<br>[No authors listed]<br>Drugs in R and D 2003<br>4(5):306-309 doi:10.2165/00126839-200304050-00005                      | Scopus           | Discard<br>Reasons:<br>Not of interest |
| 261. | Cannabis-based medicines for chronic neuropathic pain in adults.<br>Mucke M, Phillips T, Radbruch L, Petzke F, Hauser W.<br>COCHRANE DATABASE OF SYSTEMATIC REVIEWS 2018<br>(3): CD012182 doi: 10.1002/14651858.CD012182.pub2                 | Web of Science   | Discard<br>Reasons:<br>Not of interest |
| 262. | Cannabis-based medicines in multiple sclerosis - A review of clinical studies<br>Rog DJ<br>Immunobiology 2010<br>215(8):658-672 doi:10.1016/j.imbio.2010.03.009                                                                               | Scopus           | Discard<br>Reasons:<br>Not of interest |
| 263. | Cannabis-based medicines on trial<br>Pharmaceutical Journal 2002<br>268:7183                                                                                                                                                                  | Scopus           | Discard<br>Reasons:<br>Not of interest |
| 264. | Cannabis-based medicinal products: summary of NICE guidance<br>Chang-Douglass S, Mulvihill C, Pilling S<br>BMJ 2020<br>369:m1108. doi: 10.1136/bmj.m1108                                                                                      | Pubmed<br>Scopus | Discard<br>Reasons:<br>Not of interest |

|      |                                                                                                                                                                                                                                                                                                                     |                                    |                                        |
|------|---------------------------------------------------------------------------------------------------------------------------------------------------------------------------------------------------------------------------------------------------------------------------------------------------------------------|------------------------------------|----------------------------------------|
| 265. | Cannabis-based treatment induces polarity-reversing plasticity assessed by theta burst stimulation in humans.<br>Koch G, Mori F, CodecÃ C, Kusayanagi H, Monteleone F, Buttari F, Fiore S, Bernardi G, Centonze D.<br>Brain Stimul. 2009<br>2(4):229-33. doi: 10.1016/j.brs.2009.03.001.                            | Pubmed<br>Scopus                   | Discard<br>Reasons:<br>Not of interest |
| 266. | Cannabislegemiddel i Norge-grunnlaget for godkjenning<br>Tidsskrift for den Norske Laegeforening 2012<br>132(23-24):2598-2599 doi:10.4045/tidsskr.12.1250                                                                                                                                                           | Pubmed<br>Scopus                   | Discard<br>Reasons:<br>Not of interest |
| 267. | CB receptor ligands from plants<br>Woelkart K, Salo-Ahen OMH, Bauer R<br>Current Topics in Medicinal Chemistry 2008<br>8(3):173-186 doi:10.2174/156802608783498023                                                                                                                                                  | Scopus<br>Web of Science           | Discard<br>Reasons:<br>Not of interest |
| 268. | CBD Suppression of EAE Is Correlated with Early Inhibition of Splenic IFN- $\gamma$ + CD8+ T Cells and Modest Inhibition of Neuroinflammation<br>Nichols JM, Kummari E, Sherman J, Yang EJ, Dhital S, Gilfeather C, Yray G, Morgan T, Kaplan BLF<br>J Neuroimmune Pharmacol 2020<br>doi: 10.1007/s11481-020-09917-8 | Pubmed<br>Scopus<br>Web of Science | Keep                                   |
| 269. | Chemistry and pharmacotoxicity of cannabis: Recent data<br>Tesseromati C, Karikas GA<br>Pharmakeftiki 2019<br>31(3):124-156                                                                                                                                                                                         | Scopus                             | Discard<br>Reasons:<br>Not of interest |
| 270. | Clinical and electrophysiological measures in a cohort of multiple sclerosis patients during treatment with nabiximols for spasticity.<br>Paolino I, Medici D, Zagaglia S, Cerqua R, Danni MC, Provinciali L.<br>Multiple Sclerosis Journal 2013<br>19(11):281-281 Supplement: S                                    | Web of Science                     | Discard<br>Reasons:<br>Not of interest |
| 271. | Clinical case reviews and poster sessions in multiple sclerosis spasticity: main outcomes and highlights.<br>Trojano M, Celius EG, Donz  C, Izquierdo G, Patti F, P hlau D.<br>Eur Neurol. 2014 72 Suppl 1:15-9. doi: 10.1159/000367619.                                                                            | Pubmed<br>Scopus                   | Discard<br>Reasons:<br>Not of interest |
| 272. | Clinical case reviews in multiple sclerosis spasticity: experiences from around Europe<br>Koehler J, Amato MP, Oreja-Guevara C, Lycke J.<br>Expert Rev Neurother. 2013<br>13(12 Suppl):61-6. doi: 10.1586/14737175.2013.865881.                                                                                     | Pubmed<br>Scopus<br>Web of Science | Discard<br>Reasons:<br>Not of interest |

|      |                                                                                                                                                                                                                                                                                                          |                                    |                                        |
|------|----------------------------------------------------------------------------------------------------------------------------------------------------------------------------------------------------------------------------------------------------------------------------------------------------------|------------------------------------|----------------------------------------|
| 273. | Clinical Data for the Use of Cannabis-Based Treatments: A Comprehensive Review of the Literature<br>Inglet S, Winter B, Yost SE, Entringer S, Lian A, Biksacky M, Pitt RD, Mortensen W.<br>Ann Pharmacother. 2020<br>doi: 10.1177/1060028020930189                                                       | Pubmed<br>Scopus<br>Web of Science | Discard<br>Reasons:<br>Not of interest |
| 274. | Clinical efficacy and effectiveness of Sativex ®, a combined cannabinoid medicine, in multiple sclerosis-related spasticity<br>Oreja-Guevara C<br>Expert Review of Neurotherapeutics 2012<br>12(4) SUPPL. 3-8 doi:10.1586/ern.12.11                                                                      | Pubmed<br>Scopus                   | Discard<br>Reasons:<br>Not of interest |
| 275. | Clinical Endocannabinoid Deficiency Reconsidered: Current Research Supports the Theory in Migraine, Fibromyalgia, Irritable Bowel, and Other Treatment-Resistant Syndromes.<br>Russo EB.<br>Cannabis Cannabinoid Res. 2016<br>1(1):154-165. doi: 10.1089/can.2016.0009                                   | Pubmed<br>Scopus                   | Discard<br>Reasons:<br>Not of interest |
| 276. | Clinical experience with THC: CBD oromucosal spray in patients with multiple sclerosis-related spasticity.<br>Koehler J, Feneberg W, Meier M, Pollmann, W<br>International Journal of Neuroscience 2014<br>124(9): 652-656 doi: 10.3109/00207454.2013.877460                                             | Pubmed<br>Scopus<br>Web of Science | Discard<br>Reasons:<br>Not of interest |
| 277. | Clinical experiences with cannabinoids in spasticity management in multiple sclerosis.<br>Lorente Fernández L, Monte Boquet E, Pérez-Miralles F, Gil Gómez I, Escutia Roig M, Bosca Blasco I, Poveda Andrés JL, Casanova-Estruch B.<br>Neurologia. 2014<br>29(5):257-60. doi: 10.1016/j.nrl.2013.06.014. | Pubmed<br>Scopus<br>Web of Science | Discard<br>Reasons:<br>Not of interest |
| 278. | Clinical experiences with on-label nabiximols therapy in multiple sclerosis-induced spasticity.<br>Koehler J, Feneberg W, Gorodetzky H, Meier M, Pollmann W.<br>MULTIPLE SCLEROSIS JOURNAL 2013<br>19(11): 281-282 Supplement: S                                                                         | Web of Science                     | Discard<br>Reasons:<br>Not of interest |
| 279. | Clinical perspectives on medical marijuana (cannabis) for neurologic disorders<br>Fife TD, Moawad H, Moschonas C, Shepard K, Hammond N<br>Neurology: Clinical Practice 2015<br>5(4): 344-351 doi:10.1212/CPJ.000000000000162                                                                             | Scopus                             | Discard<br>Reasons:<br>Not of interest |
| 280. | Clinical Response to Nabiximols (Sativex ®) on Spasticity and Pain Is Paralleled by a Down-Regulation of Immune-Related Pathways in Multiple Sclerosis Patients.                                                                                                                                         | Web of Science                     | Discard<br>Reasons:                    |

|      |                                                                                                                                                                                                                                                                                                                                                   |                                    |                                        |
|------|---------------------------------------------------------------------------------------------------------------------------------------------------------------------------------------------------------------------------------------------------------------------------------------------------------------------------------------------------|------------------------------------|----------------------------------------|
|      | Boneschi FM, Sorosina M, Ferrè I, Clarelli F, Martinelli V, Esposito F, Comi G.<br>NEUROLOGY 2016<br>86 Supplement: 16 Meeting Abstract: P2.169                                                                                                                                                                                                   |                                    | Not of interest                        |
| 281. | Clinical response to Nabiximols correlates with the downregulation of immune pathways in multiple sclerosis<br>Sorosina M, Clarelli F, Ferrè L, Osiceanu AM, Unal NT, Mascia E, Martinelli V, Comi G, Benigni F, Esposito F, Martinelli Boneschi F.<br>Eur J Neurol. 2018<br>25(7):934-e70. doi: 10.1111/ene.13623                                | Pubmed<br>Scopus<br>Web of Science | Keep                                   |
| 282. | Clinical Use of Cannabinoids for Symptom Control in Multiple Sclerosis<br>Notcutt WG.<br>Neurotherapeutics 2015<br>12(4):769-77. doi: 10.1007/s13311-015-0383-5.                                                                                                                                                                                  | Pubmed<br>Scopus<br>Web of Science | Discard<br>Reasons:<br>Not of interest |
| 283. | Clinical/therapeutic approaches for cannabinoid ligands in central and peripheral nervous system diseases: Mini review<br>Fija, K, Filip M.<br>Clinical Neuropharmacology 2016<br>39(2):94-101 doi:10.1097/WNF.000000000000132                                                                                                                    | Pubmed<br>Scopus<br>Web of Science | Discard<br>Reasons:<br>Not of interest |
| 284. | CNS immune surveillance and neuroinflammation: Endocannabinoids keep control<br>Wolf SA, Tauber S, Ullrich O<br>Current Pharmaceutical Design 2008<br>14(23):2266-2278 doi:10.2174/138161208785740090                                                                                                                                             | Scopus                             | Discard<br>Reasons:<br>Not of interest |
| 285. | Combination of Cannabinoids, Delta 9-Tetrahydrocannabinol and Cannabidiol, Ameliorates Experimental Multiple Sclerosis by Suppressing Neuroinflammation Through Regulation of miRNA-Mediated Signaling Pathways.<br>Al-Ghezi ZZ, Miranda K, Nagarkatti M, Nagarkatti PS<br>Frontiers in Immunology 2019<br>10: 1921 doi: 10.3389/fimmu.2019.01921 | Pubmed<br>Scopus<br>Web of Science | Keep                                   |
| 286. | Combination of cannabinoids, delta-9-tetrahydrocannabinol (THC) and cannabidiol (CBD), mitigates experimental autoimmune encephalomyelitis (EAE) by altering the gut microbiome<br>Al-Ghezi ZZ, Busbee PB, Alghetaa H, Nagarkatti PS, Nagarkatti M.<br>Brain Behav Immun. 2019<br>82:25-35. doi: 10.1016/j.bbi.2019.07.028                        | Pubmed<br>Scopus<br>Web of Science | Keep                                   |
| 287. | Combined cannabinoid therapy via an oromucosal spray<br>Perez J<br>Drugs of Today 2006                                                                                                                                                                                                                                                            | Scopus<br>Web of Science           | Discard<br>Reasons:<br>Not of interest |

|      |                                                                                                                                                                                                                                                                                                                                                                                                                                                                                                |                                    |                                        |
|------|------------------------------------------------------------------------------------------------------------------------------------------------------------------------------------------------------------------------------------------------------------------------------------------------------------------------------------------------------------------------------------------------------------------------------------------------------------------------------------------------|------------------------------------|----------------------------------------|
|      | 42(8):495-503 doi:10.1358/dot.2006.42.8.1021517                                                                                                                                                                                                                                                                                                                                                                                                                                                |                                    |                                        |
| 288. | Comparison of orally administered cannabis extract and delta-9-tetrahydrocannabinol in treating patients with cancer-related anorexia-cachexia syndrome: A multicenter, phase III, randomized, double-blind, placebo-controlled clinical trial from the cannabis-in-cachexia-study-group.<br>Strasser F, Luftner D, Possinger K, Ernst G, Ruhstaller T, Meissner W, Ko YD, Schnelle M, Reif M, Cerny T<br>Journal of Clinical Oncology 2006<br>24(21): 3394-3400 doi: 10.1200/JCO.2005.05.1847 | Web of Science                     | Discard<br>Reasons:<br>Not of interest |
| 289. | Complementary and alternative medical therapies in multiple sclerosis--the American Academy of Neurology guidelines: a commentary<br>Yadav V, Narayanaswami P.<br>Clin Ther. 2014<br>36(12):1972-1978. doi: 10.1016/j.clinthera.2014.10.011.                                                                                                                                                                                                                                                   | Pubmed<br>Scopus<br>Web of Science | Discard<br>Reasons:<br>Not of interest |
| 290. | Complementary and alternative medicine: Is there a role in multiple sclerosis?<br>Yadav V, Bourdette D<br>Current Neurology and Neuroscience Reports 2006<br>6(3):259-267 doi:10.1007/s11910-006-0014-y                                                                                                                                                                                                                                                                                        | Scopus                             | Discard<br>Reasons:<br>Not of interest |
| 291. | Comprehensive Review of Medicinal Marijuana, Cannabinoids, and Therapeutic Implications in Medicine and Headache: What a Long Strange Trip It's Been.<br>Baron EP<br>Headache 2015<br>55(6): 885-916 doi: 10.1111/head.12570                                                                                                                                                                                                                                                                   | Web of Science                     | Discard<br>Reasons:<br>Not of interest |
| 292. | Conditional okay for cannabis prescription drug<br>Sibbald B<br>CMAJ 2005<br>172(13):1672 doi:10.1503/cmaj.050628                                                                                                                                                                                                                                                                                                                                                                              | Pubmed<br>Scopus                   | Discard<br>Reasons:<br>Not of interest |
| 293. | Consensus document on spasticity in patients with multiple sclerosis [Documento de consenso sobre la espasticidad en pacientes con esclerosis múltiple]<br>Oreja-Guevara C, Montalban X, de Andrés C, Casanova-Estruch B, Muñoz-García D, García I, Fernández O<br>Revista de Neurologia 2013<br>57(8):359-373 doi: 10.33588/rn.5708.2013374                                                                                                                                                   | Scopus<br>Web of Science           | Discard<br>Reasons:<br>Not of interest |
| 294. | Control of spasticity in a multiple sclerosis model using central nervous system-excluded CB1 cannabinoid receptor agonists                                                                                                                                                                                                                                                                                                                                                                    | Scopus                             | Discard<br>Reasons:<br>Not of interest |

|      |                                                                                                                                                                                                                                                                                                                   |                                    |                                        |
|------|-------------------------------------------------------------------------------------------------------------------------------------------------------------------------------------------------------------------------------------------------------------------------------------------------------------------|------------------------------------|----------------------------------------|
|      | Pryce G, Visintin C, Ramagopalan SV, Al-Izki S, De Faveri LE., Nuamah RA, Mein CA, Montpetit A, Hardcastle AJ, Kooij G, de Vries HE, Amor S, Thomas SA, Ledent C, Marsicano G, Lutz B, Thompson AJ, Selwood DL, Giovannoni G, Baker D<br>FASEB Journal 2014<br>28(1):117-130 doi:10.1096/fj.13-239442             |                                    |                                        |
| 295. | Cortical and spinal excitability in patients with multiple sclerosis and spasticity after oromucosal cannabinoid spray<br>Squintani G, Donato F, Turri M, Deotto L, Teatini F, Moretto G, Erro R.<br>J Neurol Sci. 2016<br>370:263-268. doi: 10.1016/j.jns.2016.09.054.                                           | Pubmed<br>Scopus<br>Web of Science | Discard<br>Reasons:<br>Not of interest |
| 296. | Cortical excitability changes: A mirror to the natural history of multiple sclerosis? [Les modifications de l'excitabilité corticale reflètent-elles l'histoire naturelle de la sclérose en plaques ?<br>Ayache SS, Chalah MA<br>Neurophysiologie Clinique 2017<br>47(3):221-223 doi:10.1016/j.neucli.2017.02.001 | Scopus                             | Discard<br>Reasons:<br>Not of interest |
| 297. | Cost effectiveness of oromucosal cannabis-based medicine (Sativex®) for spasticity in multiple sclerosis<br>Lu L, Pearce H, Roome C, Shearer J, Lang IA, Stein K.<br>Pharmacoeconomics. 2012<br>30(12):1157-71. doi: 10.2165/11598470-000000000-00000.                                                            | Pubmed<br>Scopus                   | Discard<br>Reasons:<br>Not of interest |
| 298. | Cost-Effectiveness Analysis of Cannabinoid Oromucosal Spray Use for the Management of Spasticity in Subjects with Multiple Sclerosis<br>Clin Drug Investig 2020<br>40(4):319-326. doi: 10.1007/s40261-020-00895-6.2020                                                                                            | Scopus                             | Discard<br>Reasons:<br>Not of interest |
| 299. | Cost-effectiveness of Sativex in multiple sclerosis spasticity: new data and application to Italy<br>Slof J, Ruiz L, Vila C.<br>Expert Rev Pharmacoecon Outcomes Res. 2015<br>15(3):379-91. doi: 10.1586/14737167.2015.1025759.                                                                                   | Pubmed<br>Scopus<br>Web of Science | Discard<br>Reasons:<br>Not of interest |
| 300. | Country breakout session highlights<br>Ghezzi A, Filli L, Solaro C, Mekies C, Landete L, Lycke J<br>Neurodegenerative disease management 2016<br>6(6):41-44                                                                                                                                                       | Pubmed<br>Scopus                   | Discard<br>Reasons:<br>Not of interest |
| 301. | Critical Role of Mast Cells and Peroxisome Proliferator-Activated Receptor gamma in the Induction of Myeloid-Derived Suppressor Cells by Marijuana Cannabidiol In Vivo.<br>Hegde VL, Singh UP, Nagarkatti PS, Nagarkatti M                                                                                        | Web of Science                     | Discard<br>Reasons:<br>Not of interest |

|      |                                                                                                                                                                                                                                                                                                                                                          |                                    |                                        |
|------|----------------------------------------------------------------------------------------------------------------------------------------------------------------------------------------------------------------------------------------------------------------------------------------------------------------------------------------------------------|------------------------------------|----------------------------------------|
|      | JOURNAL OF IMMUNOLOGY 2015<br>194(11): 5211-5222 DOI: 10.4049/jimmunol.1401844                                                                                                                                                                                                                                                                           |                                    |                                        |
| 302. | Current and future drugs for treatment of MS-associated bladder dysfunction<br>Andersson KE<br>Annals of Physical and Rehabilitation Medicine 2014<br>57(5):321-328 doi:10.1016/j.rehab.2014.05.009                                                                                                                                                      | Scopus                             | Discard<br>Reasons:<br>Not of interest |
| 303. | Current application of cannabidiol (CBD) in the management and treatment of neurological disorders<br>Fiani B, Sarhadi KJ, Soula M, Zafar A, Quadri SA.<br>Neurol Sci. 2020<br>doi: 10.1007/s10072-020-04514-2                                                                                                                                           | Pubmed<br>Scopus<br>Web of Science | Discard<br>Reasons:<br>Not of interest |
| 304. | Current evidence of cannabinoid-based analgesia obtained in preclinical and human experimental settings.<br>Lotsch J, Weyer-Menkhoff I, Tegeder I<br>EUROPEAN JOURNAL OF PAIN 2018<br>22(3): 471-484 DOI: 10.1002/ejp.1148                                                                                                                               | Web of Science                     | Discard<br>Reasons:<br>Not of interest |
| 305. | Current spasticity therapy in multiple sclerosis: Practical experiences using nabiximols [Aktuelle Spastikbehandlung am Beispiel der multiplen Sklerose: Erfahrungen mit Nabiximols]<br>Psychopharmakotherapie 2015<br>22(2):84-90                                                                                                                       | Scopus                             | Discard<br>Reasons:<br>Not of interest |
| 306. | Current status of cannabis treatment of multiple sclerosis with an illustrative case presentation of a patient with MS, complex vocal tics, paroxysmal dystonia, and marijuana dependence treated with dronabinol.<br>Deutsch SI, Rosse RB, Connor JM, Burket JA, Murphy ME, Fox FJ.<br>CNS Spectr. 2008<br>13(5):393-403 doi: 10.1017/S1092852900016564 | Pubmed<br>Scopus<br>Web of Science | Discard<br>Reasons:<br>Not of interest |
| 307. | Current Therapeutic Cannabis Controversies and Clinical Trial Design Issues.<br>Russo EB<br>FRONTIERS IN PHARMACOLOGY 2016<br>7: 309 DOI: 10.3389/fphar.2016.00309                                                                                                                                                                                       | Web of Science                     | Discard<br>Reasons:<br>Not of interest |
| 308. | Daily Practice Managing Resistant Multiple Sclerosis Spasticity With Delta-9-Tetrahydrocannabinol: Cannabidiol Oromucosal Spray: A Systematic Review of Observational Studies<br>Akgün K, Essner U, Seydel C, Ziemssen T.<br>J Cent Nerv Syst Dis. 2019<br>11:1179573519831997. doi: 10.1177/1179573519831997.                                           | Scopus<br>Web of Science           | Discard<br>Reasons:<br>Not of interest |

|      |                                                                                                                                                                                                                                                                                                                                                                                                                               |                                    |                                        |
|------|-------------------------------------------------------------------------------------------------------------------------------------------------------------------------------------------------------------------------------------------------------------------------------------------------------------------------------------------------------------------------------------------------------------------------------|------------------------------------|----------------------------------------|
| 309. | Dark Classics in Chemical Neuroscience: Delta(9)-Tetrahydrocannabinol.<br>Banister SD, Arnold JC, Connor M, Glass M, McGregor IS<br>ACS CHEMICAL NEUROSCIENCE 2019<br>10(5): 2160-2175 doi: 10.1021/acchemneuro.8b00651                                                                                                                                                                                                       | Pubmed<br>Scopus<br>Web of Science | Discard<br>Reasons:<br>Not of interest |
| 310. | Delta-9-tetrahydrocannabinol + cannabidiol (New Drug)<br>[No author name available]<br>Prescrire International 2014<br>23(150):145-148                                                                                                                                                                                                                                                                                        | Pubmed<br>Scopus                   | Discard<br>Reasons:<br>Not of interest |
| 311. | Delta-9-tetrahydrocannabinol and cannabidiol: Separating the chemicals from the "weed,"<br>a pharmacodynamic discussion<br>Boggs DL, Peckham A, Boggs AA, Ranganathan M.<br>Ment Health Clin. 2016<br>6(6):277-284. doi: 10.9740/mhc.2016.11.277.                                                                                                                                                                             | Pubmed                             | Discard<br>Reasons:<br>Not of interest |
| 312. | Delta-9-Tetrahydrocannabinol/Cannabidiol (Sativex((R))): A Review of Its Use in<br>Patients with Moderate to Severe Spasticity Due to Multiple Sclerosis.<br>Syed YY, McKeage K, Scott LJ<br>DRUGS 2014<br>74(5): 563-578 DOI: 10.1007/s40265-014-0197-5                                                                                                                                                                      | Pubmed<br>Scopus<br>Web of Science | Discard<br>Reasons:<br>Not of interest |
| 313. | Delta-9-Tetrahydrocannabinol/Cannabidiol Oromucosal Spray (Sativex(®)): A Review<br>in Multiple Sclerosis-Related Spasticity<br>Keating GM.<br>Drugs. 2017<br>77(5):563-574. doi: 10.1007/s40265-017-0720-6.                                                                                                                                                                                                                  | Pubmed<br>Scopus<br>Web of Science | Discard<br>Reasons:<br>Not of interest |
| 314. | Delta-9-tetrahydrocannabinol-cannabidiol in the treatment of spasticity in chronic spinal<br>cord injury: A clinical experience [Delta-9-tetrahydrocannabinol-cannabidiol en el<br>tratamiento de la espasticidad en la lesión medular crónica: Una experiencia clínica]<br>Grao-Castellote C, Torralba-Collados F, Gonzalez LM, Giner-Pascual M<br>Revista de Neurologia 2017<br>65(7):295-302 doi: 10.33588/rn.6507.2017118 | Scopus<br>Web of Science           | Discard<br>Reasons:<br>Not of interest |
| 315. | Dendropanax morbiferus leaf extract facilitates oligodendrocyte development<br>Kim JY, Yoon JY, Sugiura Y, Lee SK, Park JD, Song GJ, Yang HJ.<br>R Soc Open Sci. 2019<br>6(6):190266. doi: 10.1098/rsos.190266.                                                                                                                                                                                                               | Pubmed<br>Scopus<br>Web of Science | Discard<br>Reasons:<br>Not of interest |
| 316. | Der er evidens for brug af cannabinoider til symptomatisk behandling af multipel sklerose<br>Basinski H, Jensen H.B, Stenager E<br>Ugeskrift for Laeger 2015<br>177(10):956-960                                                                                                                                                                                                                                               | Scopus                             | Discard<br>Reasons:<br>Not of interest |



|      |                                                                                                                                                                                                                                                                                                                                                |                |                                        |
|------|------------------------------------------------------------------------------------------------------------------------------------------------------------------------------------------------------------------------------------------------------------------------------------------------------------------------------------------------|----------------|----------------------------------------|
| 317. | Determinants of botulinum toxin discontinuation in multiple sclerosis: a retrospective study<br>Latino P, Castelli L, Prosperini L, Marchetti MR, Pozzilli C, Giovannelli M<br>Neurological Sciences 2017<br>38(10):1841-1848 doi:10.1007/s10072-017-3078-3                                                                                    | Scopus         | Discard<br>Reasons:<br>Not of interest |
| 318. | Development of a primary cutaneous CD30(+) anaplastic large-cell T-cell lymphoma during treatment of multiple sclerosis with fingolimod<br>Papatthemeli D, Gräfe R, Hildebrandt U, Zettl UK, Ulrich J<br>Multiple Sclerosis 2016<br>22(14):1888-1890 doi:10.1177/1352458516645868                                                              | Scopus         | Discard<br>Reasons:<br>Not of interest |
| 319. | Dexanabinol Pharmos<br>Pop E<br>Current Opinion in Investigational Drugs 2000<br>1(4):494-503                                                                                                                                                                                                                                                  | Scopus         | Discard<br>Reasons:<br>Not of interest |
| 320. | Dexanabinol: A novel cannabinoid with neuroprotective properties<br>Darlington CL<br>IDrugs 2003<br>6(10):976-979                                                                                                                                                                                                                              | Scopus         | Discard<br>Reasons:<br>Not of interest |
| 321. | Dietary fats and pharmaceutical lipid excipients increase systemic exposure to orally administered cannabis and cannabis-based medicines.<br>Zgair A, Wong JCM, Lee JB, Mistry J, Sivak O, Wasan KM, Hennig IM, Barrett DA, Constantinescu CS, Fischer PM, Gershkovich P<br>AMERICAN JOURNAL OF TRANSLATIONAL RESEARCH 2016<br>8(8): 3448-3459 | Web of Science | Discard<br>Reasons:<br>Not of interest |
| 322. | Differential transcriptional profiles mediated by exposure to the cannabinoids cannabidiol and Delta (9)-tetrahydrocannabinol in BV-2 microglial cells.<br>Juknat A, Pietr M, Kozela E, Rimmerman N, Levy R, Coppola G, Geschwind D, Vogel Z<br>BRITISH JOURNAL OF PHARMACOLOGY 2012<br>165(8):2512-2528 doi: 10.1111/j.1476-5381.2011.01461.x | Web of Science | Discard<br>Reasons:<br>Not of interest |
| 323. | "Disease modifying nutraceuticals" for multiple sclerosis<br>Schmitz K, Barthelmes J, Stolz L, Beyer S, Diehl O, Tegeder I<br>Pharmacology and Therapeutics 2015<br>148:85-113 doi:10.1016/j.pharmthera.2014.11.015                                                                                                                            | Scopus         | Discard<br>Reasons:<br>Not of interest |
| 324. | Distinct interactions of cannabidiol and morphine in three nociceptive behavioral models in mice.<br>Neelakantan H, Tallarida RJ, Reichenbach ZW, Tuma RF, Ward SJ, Walker EA<br>BEHAVIOURAL PHARMACOLOGY 2015                                                                                                                                 | Web of Science | Discard<br>Reasons:<br>Not of interest |

|      |                                                                                                                                                                                                                                                                                                                                                                                                 |                                    |                                        |
|------|-------------------------------------------------------------------------------------------------------------------------------------------------------------------------------------------------------------------------------------------------------------------------------------------------------------------------------------------------------------------------------------------------|------------------------------------|----------------------------------------|
|      | 26(3): 304-314 doi: 10.1097/FBP.0000000000000119                                                                                                                                                                                                                                                                                                                                                |                                    |                                        |
| 325. | Divergent effects of cannabidiol on the discriminative stimulus and place conditioning effects of Delta (9)-tetrahydrocannabinol<br>Vann RE, Gamage TF, Warner JA, Marshall EM, Taylor NL, Martin BR, Wiley JL.<br>Drug Alcohol Depend. 2008<br>94(1-3):191-8. doi: 10.1016/j.drugalcdep.2007.11.017                                                                                            | Pubmed<br>Scopus<br>Web of Science | Discard<br>Reasons:<br>Not of interest |
| 326. | DMH-CBD, a cannabidiol analog with reduced cytotoxicity, inhibits TNF production by targeting NF-kB activity dependent on A(2A) receptor.<br>Silva RL, Silveira GT, Wanderlei CW, Cecilio NT, Maganin AGM, Franchin M, Marques LMM, Lopes NP, Crippa, JA, Guimaraes FS; Alves JCF, Cunha FQ, Cunha TM<br>TOXICOLOGY AND APPLIED PHARMACOLOGY 2019<br>368: 63-71 doi: 10.1016/j.taap.2019.02.011 | Web of Science                     | Discard<br>Reasons:<br>Not of interest |
| 327. | Do cannabinoids confer neuroprotection against epilepsy? An overview<br>Capasso A<br>Open Neurology Journal 2017,<br>11(61):73 doi:10.2174/1874205X01711010061                                                                                                                                                                                                                                  | Scopus                             | Discard<br>Reasons:<br>Not of interest |
| 328. | Do cannabis-based medicinal extracts have general or specific effects on symptoms in multiple sclerosis? A double-blind, randomized, placebo-controlled study on 160 patients<br>Wade DT, Makela P, Robson P, House H, Bateman C.<br>Mult Scler. 2004<br>10(4):434-41                                                                                                                           | Pubmed<br>Scopus<br>Web of Science | Discard<br>Reasons:<br>Not of interest |
| 329. | Dronabinol and chronic pain: Importance of mechanistic considerations<br>De Vries M, Van Rijkevorsel DC, Wilder-Smith OH, Van Goor H<br>Expert Opinion on Pharmacotherapy 2014<br>15(11):1525-1534 doi:10.1517/14656566.2014.918102                                                                                                                                                             | Scopus                             | Discard<br>Reasons:<br>Not of interest |
| 330. | Dronabinol/Cannabidiol<br>Mealy NE, Bayés M<br>Drugs of the Future 2004 Short survey<br>29(3):282                                                                                                                                                                                                                                                                                               | Scopus                             | Discard<br>Reasons:<br>Not of interest |
| 331. | Dronabinol/Cannabidiol<br>Mealy NE, Bayés M<br>Drugs of the Future 2005 Note<br>30(2):198                                                                                                                                                                                                                                                                                                       | Scopus                             | Discard<br>Reasons:<br>Not of interest |
| 332. | Drug discovery strategies that focus on the endocannabinoid signaling system in psychiatric disease<br>Expert Opinion on Drug Discovery 2015<br>10(1):17-36 doi:10.1517/17460441.2014.966680                                                                                                                                                                                                    | Scopus                             | Discard<br>Reasons:<br>Not of interest |

|      |                                                                                                                                                                                                                                                                         |                                    |                                        |
|------|-------------------------------------------------------------------------------------------------------------------------------------------------------------------------------------------------------------------------------------------------------------------------|------------------------------------|----------------------------------------|
| 333. | Drug-resistant MS spasticity treatment with Sativex (R) add-on and driving ability.<br>Freidel M, Tiel-Wilck K, Schreiber H, Prechtl A, Essner U, Lang M<br>ACTA NEUROLOGICA SCANDINAVICA<br>131(1): 9-16 DOI: 10.1111/ane.12287                                        | Pubmed<br>Scopus<br>Web of Science | Discard<br>Reasons:<br>Not of interest |
| 334. | Drugs for chronic pain in children: A commentary on clinical practice and the absence of evidence<br>Pain Research and Management 2013<br>18(1):47-50 doi:10.1155/2013/402863                                                                                           | Scopus                             | Discard<br>Reasons:<br>Not of interest |
| 335. | Early Treatment of Experimental Autoimmune Encephalomyelitis with Cannabidiol Suppresses Tc1 Cells and Reduces Neuroinflammation.<br>Nichols JM, Kummari E, Sherman J, Szafran B, Kaplan B<br>JOURNAL OF IMMUNOLOGY 2018<br>200(1 Supplement): 121.10                   | Web of Science                     | Discard<br>Reasons: Not of interest    |
| 336. | Editorial<br>Kullmann DM<br>Brain 2019<br>142(9): 2545 doi:10.1093/brain/awz253                                                                                                                                                                                         | Scopus                             | Discard<br>Reasons:<br>Not of interest |
| 337. | Editors' welcome<br>Banwell B, Giovannoni G, Hawkes C, Lublin F<br>Multiple Sclerosis and Related Disorders 2012<br>1(2):55 doi:10.1016/j.msard.2012.01.005                                                                                                             | Scopus                             | Discard<br>Reasons:<br>Not of interest |
| 338. | Effect of cannabidiolic acid and Delta(9)-tetrahydrocannabinol on carrageenan-induced hyperalgesia and edema in a rodent model of inflammatory pain.<br>Rock EM, Limebeer CL, Parker LA<br>PSYCHOPHARMACOLOGY 2018<br>235(11): 3259-3271 DOI: 10.1007/s00213-018-5034-1 | Web of Science                     | Discard<br>Reasons:<br>Not of interest |
| 339. | Effects of EHP-101 on inflammation and remyelination in murine models of Multiple sclerosis<br>Navarrete C, García-Martin A, Garrido-Rodríguez M, Mestre L, Feliu A, Guaza C, Calzado MA, Muñoz E<br>Neurobiol Dis. 2020<br>143:104994 doi: 10.1016/j.nbd.2020.104994   | Pubmed<br>Scopus                   | Discard<br>Reasons:<br>Not of interest |
| 340. | Effect of Sativex on spasticity-associated symptoms in patients with multiple sclerosis<br>Meuth SG, Vila C, Dechant KL.<br>Expert Rev Neurother. 2015<br>15(8):909-18. doi: 10.1586/14737175.2015.1067607.                                                             | Pubmed<br>Web of Science           | Discard<br>Reasons:<br>Not of interest |

|      |                                                                                                                                                                                                                                                                                                                                                                                                                                                                                                                                                                                                                  |                                    |                                        |
|------|------------------------------------------------------------------------------------------------------------------------------------------------------------------------------------------------------------------------------------------------------------------------------------------------------------------------------------------------------------------------------------------------------------------------------------------------------------------------------------------------------------------------------------------------------------------------------------------------------------------|------------------------------------|----------------------------------------|
| 341. | Effects of THC/CBD oromucosal spray on spasticity-related symptoms in people with multiple sclerosis: results from a retrospective multicenter study<br>Patti F, Chisari CG, Solaro C, Benedetti MD, Berra E, Bianco A, Bruno Bossio R, Buttari F, Castelli L, Cavalla P, Cerqua R, Costantino G, Gasperini C, Guareschi A, Ippolito D, Lanzillo R, Maniscalco GT, Matta M, Paolicelli D, Petrucci L, Pontecorvo S, Righini I, Russo M, Saccà F, Salamone G, Signoriello E, Spinicci G, Spitaleri D, Tavazzi E, Trotta M, Zaffaroni M, Zappia M<br>Neurological Sciences 2020<br>doi: 10.1007/s10072-020-04413-6 | Pubmed<br>Scopus<br>Web of Science | Discard<br>Reasons:<br>Not of interest |
| 342. | Effect of tetrahydrocannabinol: cannabidiol oromucosal spray on activities of daily living in multiple sclerosis patients with resistant spasticity: a retrospective, observational study.<br>Frechin JM<br>NEURODEGENERATIVE DISEASE MANAGEMENT 2018<br>8(3): 151-159 doi: 10.2217/nmt-2017-0055                                                                                                                                                                                                                                                                                                                | Pubmed<br>Scopus<br>Web of Science | Discard<br>Reasons:<br>Not of interest |
| 343. | Effectiveness and safety of Tetrahydrocannabinol - Cannabidiol Oromucosal spray in Belgian patients with multiple sclerosis spasticity: a retrospective data collection.<br>Popescu V, Vos C, van Dael V, Raeymaekers G, van Wijmeersch B<br>MULTIPLE SCLEROSIS JOURNAL 2019<br>Meeting Abstract: P693 25 Special Issue: SI 346-346 Supplement: 2                                                                                                                                                                                                                                                                | Web of Science                     | Discard<br>Reasons:<br>Not of interest |
| 344. | Effectiveness and Tolerability of THC/CBD Oromucosal Spray for Multiple Sclerosis Spasticity in Italy: First Data from a Large Observational Study<br>Trojano M, Vila C.<br>Eur Neurol. 2015<br>74(3-4):178-85. doi: 10.1159/000441619.                                                                                                                                                                                                                                                                                                                                                                          | Pubmed<br>Scopus<br>Web of Science | Discard<br>Reasons:<br>Not of interest |
| 345. | Effectiveness and tolerability of THC:CBD oromucosal spray as add-on measure in patients with severe chronic pain: analysis of 12-week open-label real-world data provided by the German Pain e-Registry.<br>Ueberall MA, Essner U, Mueller-Schwefe GHH<br>JOURNAL OF PAIN RESEARCH 2019<br>12: 1577-1604 doi: 10.2147/JPR.S192174                                                                                                                                                                                                                                                                               | Web of Science                     | Discard<br>Reasons:<br>Not of interest |
| 346. | Effectiveness, adverse effects, and safety of medical marijuana<br>Keehbauch J, Rensberry M<br>American Family Physician 2015<br>92(10)                                                                                                                                                                                                                                                                                                                                                                                                                                                                          | Scopus                             | Discard<br>Reasons:<br>Not of interest |
| 347. | Effects of cannabidiol on brain excitation and inhibition systems; a randomised placebo-controlled single dose trial during magnetic resonance spectroscopy in adults with and without autism spectrum disorder.                                                                                                                                                                                                                                                                                                                                                                                                 | Web of Science                     | Discard<br>Reasons:<br>Not of interest |

|      |                                                                                                                                                                                                                                                                                                                                                                                                                                                         |                                    |                                        |
|------|---------------------------------------------------------------------------------------------------------------------------------------------------------------------------------------------------------------------------------------------------------------------------------------------------------------------------------------------------------------------------------------------------------------------------------------------------------|------------------------------------|----------------------------------------|
|      | Pretzsch CM, Freyberg J, Voinescu B, Lythgoe D, Horder J, Mendez MA, Wichers R, Ajram L, Ivin G, Heasman M, Edden RAE, Williams S Murphy DGM, Daly E, McAlonan GM<br>Neuropsychopharmacology 2019<br>44(8): 1398-1405 doi: 10.1038/s41386-019-0333-8                                                                                                                                                                                                    |                                    |                                        |
| 348. | Effects of cannabinoid administration for pain: A meta-analysis and meta-regression<br>Yanes JA, McKinnell ZE, Reid MA, Busler JN, Michel JS, Pangelinan MM, Sutherland MT, Younger JW, Gonzalez R, Robinson JL<br>Experimental and Clinical Psychopharmacology 2019<br>27(4):370-382 doi:10.1037/pha0000281                                                                                                                                            | Scopus                             | Discard<br>Reasons:<br>Not of interest |
| 349. | Effects of Sativex and neuromotor rehabilitation treatment: case report with cerebral palsy and supervening multiple sclerosis.<br>Camerano C, Camuzzini N, Lentino C, Checchia GA<br>42ND CONGRESSO NAZIONALE SIMFER 2015<br>38-40                                                                                                                                                                                                                     | Web of Science                     | Discard<br>Reasons:<br>Not of interest |
| 350. | Efficacy and discontinuation of nabiximols in patients with multiple sclerosis: a real-life study.<br>Bergamaschi V, Konrad G, Battaglia MA, Bricchetto G<br>Multiple Sclerosis Journal 2018<br>Meeting Abstract: EP1698 24: 959-959 Supplement: 2                                                                                                                                                                                                      | Web of Science                     | Discard<br>Reasons:<br>Not of interest |
| 351. | Efficacy and safety of cannabinoid oromucosal spray for multiple sclerosis spasticity<br>Patti F, Messina S, Solaro C, Amato MP, Bergamaschi R, Bonavita S, Bruno Bossio R, Brescia Morra V, Costantino GF, Cavalla P, Centonze D, Comi G, Cottone S, Danni M, Francia A, Gajofatto A, Gasperini C, Ghezzi A, Iudice A, Lus G, Maniscalco GT, Marrosu MG, et al.<br>J Neurol Neurosurg Psychiatry. 2016<br>87(9):944-51. doi: 10.1136/jnnp-2015-312591. | Pubmed<br>Scopus<br>Web of Science | Discard<br>Reasons:<br>Not of interest |
| 352. | Efficacy and safety of nabiximols (Sativex (R)) on multiple sclerosis spasticity in a real-life Italian monocentric study.<br>Ferre L, Nuara A, Pavan G, Radaelli M, Moiola L, Rodegher M, Colombo B, Sarmiento IJK, Martinelli V, Leocani L, Boneschi FM, Comi G, Esposito F<br>Neurological Sciences 2016<br>37(2):235-242 doi: 10.1007/s10072-015-2392-x                                                                                             | Pubmed<br>Scopus<br>Web of Science | Discard<br>Reasons:<br>Not of interest |
| 353. | Efficacy and Tolerability of Phytomedicines in Multiple Sclerosis Patients: A Review.<br>Farzaei MH, Shahpiri Z, Bahramsoltani R, Nia MM, Najafi F, Rahimi R<br>CNS DRUGS 2017                                                                                                                                                                                                                                                                          | Pubmed<br>Scopus<br>Web of Science | Discard<br>Reasons:<br>Not of interest |

|      |                                                                                                                                                                                                                                                                                                                                                                                      |                                    |                                        |
|------|--------------------------------------------------------------------------------------------------------------------------------------------------------------------------------------------------------------------------------------------------------------------------------------------------------------------------------------------------------------------------------------|------------------------------------|----------------------------------------|
|      | 31(10): 867-889 DOI: 10.1007/s40263-017-0466-4                                                                                                                                                                                                                                                                                                                                       |                                    |                                        |
| 354. | Efficacy of Cannabidiol: Clinical Studies with Cannabidiol and Cannabidiol-Containing Extracts [Wirksamkeit von Cannabidiol: Klinische Studien mit Cannabidiol und Cannabidiol-haltigen Extrakten]<br>Büechi S<br>Schweizerische Zeitschrift für GanzheitsMedizin 2017,<br>29(6):367-371 doi:10.1159/000484886                                                                       | Scopus<br>Web of Science           | Discard<br>Reasons:<br>Not of interest |
| 355. | Efficacy, safety and tolerability of an orally administered cannabis extract in the treatment of spasticity in patients with multiple sclerosis: a randomized, double-blind, placebo-controlled, crossover study<br>Vaney C, Heinzel-Gutenbrunner M, Jobin P, Tschopp F, Gattlen B, Hagen U, Schnelle M, Reif M.<br>Mult Scler. 2004<br>10(4):417-24 doi: 10.1191/1352458504ms1048oa | Pubmed<br>Scopus<br>Web of Science | Discard<br>Reasons:<br>Not of interest |
| 356. | Efficacy, tolerability and safety of cannabinoids for chronic neuropathic pain. A systematic review of randomized controlled studies.<br>Petzke F, Enax-Krumova EK, Hauser W<br>SCHMERZ 2016<br>30(1): 62-88 doi: 10.1007/s00482-015-0089-y                                                                                                                                          | Web of Science                     | Discard<br>Reasons:<br>Not of interest |
| 357. | Emerging properties of cannabinoid medicines in management of multiple sclerosis.<br>Pryce G, Baker D<br>Trends in Neurosciences 2005<br>28(5): 272-276 doi: 10.1016/j.tins.2005.03.006                                                                                                                                                                                              | Web of Science                     | Discard<br>Reasons:<br>Not of interest |
| 358. | Emerging strategies for exploiting cannabinoid receptor agonists as medicines<br>Pertwee RG<br>Br J Pharmacol. 2009<br>156(3):397-411. doi: 10.1111/j.1476-5381.2008.00048.x.                                                                                                                                                                                                        | Pubmed<br>Scopus<br>Web of Science | Discard<br>Reasons:<br>Not of interest |
| 359. | Emerging strategies targeting CB2 cannabinoid receptor: Biased agonism and allosterism<br>Biochemical Pharmacology 2018,<br>157:8-17 doi:10.1016/j.bcp.2018.07.031                                                                                                                                                                                                                   | Scopus                             | Discard<br>Reasons:<br>Not of interest |
| 360. | Endocannabinoid pathways and their role in multiple sclerosis-related muscular dysfunction<br>Di Marzo V.<br>Expert Rev Neurother. 2011<br>11(4 Suppl):9- 14 doi: 10.1586/ern.11.26                                                                                                                                                                                                  | Pubmed<br>Scopus                   | Discard<br>Reasons:<br>Not of interest |
| 361. | Endocannabinoid system and psychiatry: In search of a neurobiological basis for detrimental and potential therapeutic effects                                                                                                                                                                                                                                                        | Scopus                             | Discard<br>Reasons:                    |

|      |                                                                                                                                                                                                                      |                                    |                                        |
|------|----------------------------------------------------------------------------------------------------------------------------------------------------------------------------------------------------------------------|------------------------------------|----------------------------------------|
|      | Marco EM., García-Gutiérrez MS, Bermúdez-Silva FJ, Moreira FA, Guimarães F, Manzanares J, Viveros M.-P<br>Frontiers in Behavioral Neuroscience 2011<br>67 doi:10.3389/fnbeh.2011.00063                               |                                    | Not of interest                        |
| 362. | Endocannabinoid system and stress and anxiety responses<br>Viveros MP, Marco EM., File SE<br>Pharmacology Biochemistry and Behavior 2005<br>81(2) SPEC. ISS.:331-342 doi:10.1016/j.pbb.2005.01.029                   | Scopus                             | Discard<br>Reasons:<br>Not of interest |
| 363. | Endocannabinoid system dysfunction in mood and related disorders.<br>Ashton CH, Moore PB<br>ACTA PSYCHIATRICA SCANDINAVICA 2011<br>124( 4): 250-261 DOI: 10.1111/j.1600-0447.2011.01687.x                            | Web of Science                     | Discard<br>Reasons:<br>Not of interest |
| 364. | Endocannabinoid system modulator use in everyday clinical practice in the UK and Spain<br>García-Merino A.<br>Expert Rev Neurother. 2013<br>13(3 Suppl 1):9-13. doi: 10.1586/ern.13.4.                               | Pubmed<br>Scopus<br>Web of Science | Discard<br>Reasons:<br>Not of interest |
| 365. | Endocannabinoid system: A multi-facet therapeutic target<br>Kaur R, Ambwani SR, Singh S<br>Current Clinical Pharmacology 2016<br>11(2):110-117 doi:10.2174/1574884711666160418105339                                 | Scopus<br>Web of Science           | Discard<br>Reasons:<br>Not of interest |
| 366. | Endocannabinoids and multiple sclerosis: A blessing from the 'inner bliss'?<br>Di Marzo V, Bifulco M, De Petrocellis L<br>Trends in Pharmacological Sciences 2000<br>21(6):195-197 doi:10.1016/S0165-6147(00)01487-5 | Scopus                             | Discard<br>Reasons:<br>Not of interest |
| 367. | Endocannabinoids and neurodegenerative diseases<br>Micale V, Mazzola C, Drago F<br>Pharmacological Research 2007<br>56(5):382-392 doi:10.1016/j.phrs.2007.09.008                                                     | Scopus                             | Discard<br>Reasons:<br>Not of interest |
| 368. | Endocannabinoids in multiple sclerosis and amyotrophic lateral sclerosis<br>Pryce G, Baker D<br>Handbook of Experimental Pharmacology 2015<br>231:213-231 doi:10.1007/978-3-319-20825-1_7                            | Scopus                             | Discard<br>Reasons:<br>Not of interest |
| 369. | Endocannabinoids: A unique opportunity to develop multitarget analgesics<br>Maionea S, Costa B, Di Marzo V<br>Pain 2013<br>154 SUPPL.1:S87-S93 doi:10.1016/j.pain.2013.03.023                                        | Scopus                             | Discard<br>Reasons:<br>Not of interest |
| 370. | Epidemiology and treatment of pain in multiple sclerosis subjects                                                                                                                                                    | Scopus                             | Discard                                |

|      |                                                                                                                                                                                                                                                                                                                                               |                                    |                                        |
|------|-----------------------------------------------------------------------------------------------------------------------------------------------------------------------------------------------------------------------------------------------------------------------------------------------------------------------------------------------|------------------------------------|----------------------------------------|
|      | Solaro C<br>Neurological Sciences 2006<br>27SUPPL.4:s291-s293 doi:10.1007/s10072-006-0642-7                                                                                                                                                                                                                                                   | Web of Science                     | Reasons:<br>Not of interest            |
| 371. | Epidiolex and potential derived drugs from Cannabis and their future prospectives<br>Rajpal Charu, Kanaujia Akansha, Tomar Pushpa C<br>Medicinal Plants - International Journal of Phytomedicines and Related Industries 2019<br>11(4): 363-367 doi: 10.5958/0975-6892.2019.00047.9                                                           | Scopus                             | Discard<br>Reasons:<br>Not of interest |
| 372. | Evaluate symptomatic therapy in MS: can clinical trials be fine-tuned?<br>Solaro C.<br>Eur J Neurol. 2011<br>18(9):1113-4. doi: 10.1111/j.1468-1331.2011.03425.x.                                                                                                                                                                             | Pubmed<br>Scopus                   | Discard<br>Reasons:<br>Not of interest |
| 373. | Evaluating sativex® in neuropathic pain management: A clinical and neurophysiological assessment in multiple sclerosis<br>Russo M, Naro A, Leo A, Sessa E, D'Aleo G, Bramanti P, Calabrò RS<br>Pain Medicine (United States) 2016<br>17(6):1145-1154 doi:10.1093/pm/pnv080                                                                    | Pubmed<br>Scopus                   | Discard<br>Reasons:<br>Not of interest |
| 374. | Evaluation of cannabidiol and mesenchymal stem cells in adoptively transferred experimental autoimmune encephalomyelitis. A comparative study.<br>Gonzalez-Garcia C, Sanchez-Lopez AJ, Campos-Ruiz L, Moreno-Torres IP, Coronado MJ, Garcia-Merino JA.<br>Multiple Sclerosis Journal 2015<br>Meeting Abstract: P860 21 432-432 Supplement: 11 | Web of Science                     | Discard<br>Reasons:<br>Not of interest |
| 375. | Evaluation of the safety and tolerability profile of Sativex ®: Is it reassuring enough?<br>Wade D<br>Expert Review of Neurotherapeutics 2012<br>12(4) SUPPL.:9-14 doi:10.1586/ern.12.12                                                                                                                                                      | Pubmed<br>Scopus                   | Discard<br>Reasons:<br>Not of interest |
| 376. | Evaluation of the tolerability and efficacy of Sativex in multiple sclerosis<br>Moreno Torres I, Sanchez AJ, Garcia-Merino A.<br>Expert Rev Neurother. 2014<br>14(11):1243-50. doi: 10.1586/14737175.2014.971758.                                                                                                                             | Pubmed<br>Scopus<br>Web of Science | Discard<br>Reasons:<br>Not of interest |
| 377. | Evidence for the efficacy and effectiveness of THC-CBD oromucosal spray in symptom management of patients with spasticity due to multiple sclerosis.<br>Zetl UK, Rommer P, Hipp P, Patejdl R.<br>Ther Adv Neurol Disord. 2016<br>9(1):9-30. doi: 10.1177/1756285615612659.                                                                    | Pubmed<br>Scopus<br>Web of Science | Discard<br>Reasons:<br>Not of interest |
| 378. | Evidence for the use of "medical marijuana" in psychiatric and neurologic disorders<br>Noel C.                                                                                                                                                                                                                                                | Pubmed                             | Discard<br>Reasons:                    |



|      |                                                                                                                                                                                                                                                                       |                                    |                                        |
|------|-----------------------------------------------------------------------------------------------------------------------------------------------------------------------------------------------------------------------------------------------------------------------|------------------------------------|----------------------------------------|
|      | Ment Health Clin. 2018<br>7(1):29-38. doi: 10.9740/mhc.2017.01.029.                                                                                                                                                                                                   |                                    | Not of interest                        |
| 379. | Evolution of multiple sclerosis spasticity-associated symptoms: latest data<br>Flachenecker P.<br>Neurodegener Dis Manag. 2016<br>6(6s):9-12. doi: 10.2217/nmt-2016-0047                                                                                              | Pubmed<br>Scopus<br>Web of Science | Discard<br>Reasons:<br>Not of interest |
| 380. | Examining the roles of cannabinoids in pain and other therapeutic indications: a review.<br>Turcotte D, Le Dorze JA, Esfahani F, Frost E, Gomori A, Namaka M<br>EXPERT OPINION ON PHARMACOTHERAPY 2010<br>11(1): 17-31 doi: 10.1517/14656560903413534                 | Web of Science                     | Discard<br>Reasons:<br>Not of interest |
| 381. | Exploring cannabis use by patients with multiple sclerosis in a state where cannabis is legal<br>Weinkle L, Domen CH, Shelton I, Sillau S, Nair K, Alvarez E.<br>Mult Scler Relat Disord. 2019<br>27:383-390. doi: 10.1016/j.msard.2018.11.022.                       | Pubmed<br>Scopus<br>Web of Science | Discard<br>Reasons:<br>Not of interest |
| 382. | Expression and functions of $\mu$ -opioid receptors and cannabinoid receptors type 1 in T lymphocytes<br>Kraus J<br>Annals of the New York Academy of Sciences 2012<br>1261(1):1-6 doi:10.1111/j.1749-6632.2012.06524.x                                               | Scopus                             | Discard<br>Reasons:<br>Not of interest |
| 383. | First-in-human Study With EHP-101 Oral Solution Of A Synthetic Cannabidiol Derivative Enables The Initiation Of A Phase II Study In Multiple Sclerosis<br>Rolland A<br>Multiple Sclerosis Journal 2020<br>26: (1S) 16–89                                              | Web of Science                     | Discard<br>Reasons:<br>Not of interest |
| 384. | From anecdotal evidence of cannabinoids in multiple sclerosis to emerging new therapeutical approaches<br>Bifulco M, Laezza C, Malfitano AM<br>Multiple Sclerosis 2007<br>13(1):133-134 doi:10.1177/1352458506071303                                                  | Scopus                             | Discard<br>Reasons:<br>Not of interest |
| 385. | From cannabis to endocannabinoids in multiple sclerosis: A paradigm of central nervous system autoimmune diseases<br>Malfitano AM., Matarese G, Bifulco M<br>Current Drug Targets: CNS and Neurological Disorders 2005<br>4(6):667-675 doi:10.2174/156800705774933087 | Scopus                             | Discard<br>Reasons:<br>Not of interest |
| 386. | From cannabis to the endocannabinoid system: Refocussing attention on potential clinical benefits                                                                                                                                                                     | Scopus                             | Discard<br>Reasons:                    |

|      |                                                                                                                                                                                                                                                                                 |        |                                        |
|------|---------------------------------------------------------------------------------------------------------------------------------------------------------------------------------------------------------------------------------------------------------------------------------|--------|----------------------------------------|
|      | Youssef FF, Irving AJ<br>West Indian Medical Journal 2012<br>61(3):2841 doi:10.7727/wimj.2010.058                                                                                                                                                                               |        | Not of interest                        |
| 387. | From endocannabinoid profiling to 'endocannabinoid therapeutics'<br>Ligresti A., Petrosino S, Di Marzo V<br>Current Opinion in Chemical Biology 2009<br>13(3):321-331 doi:10.1016/j.cbpa.2009.04.615                                                                            | Scopus | Discard<br>Reasons:<br>Not of interest |
| 388. | From phytocannabinoids to cannabinoid receptors and endocannabinoids: Pleiotropic physiological and pathological roles through complex pharmacology<br>Ligresti A, De Petrocellis L, Di Marzo V<br>Physiological Reviews 2016<br>96(4):1593-1659 doi:10.1152/physrev.00002.2016 | Scopus | Discard<br>Reasons:<br>Not of interest |
| 389. | Functional role of cannabinoid receptors in urinary bladder<br>Tyagi P, Tyagi V, Yoshimura N, Chancellor M<br>Indian Journal of Urology 2010<br>26(1):26-35 doi:10.4103/0970-1591.60440                                                                                         | Scopus | Discard<br>Reasons:<br>Not of interest |
| 390. | Fungal biotransformation of cannabinoids: Potential for new effective drugs<br>Saxena S<br>Current Opinion in Drug Discovery and Development 2009<br>12(2):305-312                                                                                                              | Scopus | Discard<br>Reasons:<br>Not of interest |
| 391. | Gait disorders in multiple sclerosis<br>Bethoux F<br>CONTINUUM Lifelong Learning in Neurology 2013<br>19(4):1007-1022 doi:10.1212/01.CON.0000433286.92596.d5                                                                                                                    | Scopus | Discard<br>Reasons:<br>Not of interest |
| 392. | Gateways to Clinical Trials<br>Bayés M, Rabasseda X, Prous JR<br>Methods and Findings in Experimental and Clinical Pharmacology 2006<br>28(1):31-63                                                                                                                             | Scopus | Discard<br>Reasons:<br>Not of interest |
| 393. | Gateways to clinical trials<br>Bayés M, Rabasseda X, Prous JR<br>Methods and Findings in Experimental and Clinical Pharmacology 2007<br>29(3):231-245                                                                                                                           | Scopus | Discard<br>Reasons:<br>Not of interest |
| 394. | Glial cell AMPA Receptors in nervous system health, injury and disease<br>Ceprian M, Fulton D<br>International Journal of Molecular Sciences 2019<br>20(10):2450 doi:10.3390/ijms20102450                                                                                       | Scopus | Discard<br>Reasons:<br>Not of interest |

|      |                                                                                                                                                                                                                                                                                                                        |                  |                                        |
|------|------------------------------------------------------------------------------------------------------------------------------------------------------------------------------------------------------------------------------------------------------------------------------------------------------------------------|------------------|----------------------------------------|
| 395. | Growing medicine: Small-scale cannabis cultivation for medical purposes in six different countries<br>Hakkarainen P, Asmussen Frank V, Barratt MJ, Vibeke Dahl H, Decorte T, Karjalainen K, Lenton S, Potter G, Werse B<br>International Journal of Drug Policy 2015<br>26(3):250-256 doi:10.1016/j.drugpo.2014.07.005 | Scopus           | Discard<br>Reasons:<br>Not of interest |
| 396. | GW-1000. GW Pharmaceuticals<br>Smith PF.<br>Curr Opin Investig Drugs. 2004<br>5(7):748-54                                                                                                                                                                                                                              | Pubmed           | Discard<br>Reasons:<br>Not of interest |
| 397. | Health Authorities Data Collection of THC:CBD Oromucosal Spray (L'Agenzia Italiana del Farmaco Web Registry): Figures after 1.5 Years<br>Patti F.<br>Eur Neurol. 2016<br>75 Suppl 1:9-12. doi: 10.1159/000444236.                                                                                                      | Pubmed<br>Scopus | Discard<br>Reasons:<br>Not of interest |
| 398. | Heat Exposure of Cannabis sativa Extracts Affects the Pharmacokinetic and Metabolic Profile in Healthy Male Subjects.<br>Eichler M, Spinedi L, Unfer-Grauwiler S, Bodmer M, Surber C, Luedi M, Drewe J<br>PLANTA MEDICA 2012<br>78(7): 686-691 doi: 10.1055/s-0031-1298334                                             | Web of Science   | Discard<br>Reasons:<br>Not of interest |
| 399. | High potency cannabis: A risk factor for dependence, poor psychosocial outcomes, and psychosis<br>Hall W, Degenhardt L<br>BMJ (Online) 2015<br>350:h1205                                                                                                                                                               | Scopus           | Discard<br>Reasons:<br>Not of interest |
| 400. | Historical overview of the rationale for the pharmacological use of prolonged-release fampridine in multiple sclerosis<br>Fernandez O, Berger T, Hartung HP, Putzki N<br>Expert Review of Clinical Pharmacology 2012<br>5(6):5 doi:10.1586/ecp.12.59                                                                   | Scopus           | Discard<br>Reasons:<br>Not of interest |
| 401. | Holmes tremor caused by a natalizumab-related progressive multifocal leukoencephalopathy: a case report and brief review of the literature<br>Magistrelli L, Vecchio D, Naldi P, Comi C, Cantello R<br>Neurological Sciences 2019<br>40(9):1943-1945 doi:10.1007/s10072-019-03779-6                                    | Scopus           | Discard<br>Reasons:<br>Not of interest |
| 402. | HU-446 and HU-465, Derivatives of the Non-psychoactive Cannabinoid Cannabidiol, Decrease the Activation of Encephalitogenic T Cells                                                                                                                                                                                    | Pubmed<br>Scopus | Discard<br>Reasons:                    |

|      |                                                                                                                                                                                                                                                                                                                                                                  |                                    |                                        |
|------|------------------------------------------------------------------------------------------------------------------------------------------------------------------------------------------------------------------------------------------------------------------------------------------------------------------------------------------------------------------|------------------------------------|----------------------------------------|
|      | Kozela E, Haj C, HanuÅ; L, Chourasia M, Shurki A, Juknat A, Kaushansky N, Mechoulam R, Vogel Z.<br>Chem Biol Drug Des. 2016<br>87(1):143-53. doi: 10.1111/cbdd.12637                                                                                                                                                                                             | Web of Science                     | Not of interest                        |
| 403. | Human complication of the foot and mouth crisis.<br>Harkness KAC, Staunton TG<br>JOURNAL OF NEUROLOGY NEUROSURGERY AND PSYCHIATRY 2002<br>72(1): 139                                                                                                                                                                                                             | Web of Science                     | Discard<br>Reasons:<br>Not of interest |
| 404. | Hypoxia mimetic activity of VCE-004.8, a cannabidiol quinone derivative: implications for multiple sclerosis therapy<br>Navarrete C, Carrillo-Salinas F, Palomares B, Mecha M, Jiménez-Jiménez C, Mestre L, Feliú A, Bellido ML, Fiebich BL, Appendino G, Calzado MA, Guaza C, Muñoz E.<br>J Neuroinflammation. 2018<br>15(1):64. doi: 10.1186/s12974-018-1103-y | Pubmed<br>Scopus<br>Web of Science | Discard<br>Reasons:<br>Not of interest |
| 405. | IACM 2nd Conference on Cannabinoids in Medicine<br>Grotenhermen F, Müller-Vahl K<br>Expert Opinion on Pharmacotherapy 2003<br>4(12):2367-2371 doi:10.1517/14656566.4.12.2367                                                                                                                                                                                     | Scopus                             | Discard<br>Reasons:<br>Not of interest |
| 406. | Identification of cytochrome P450 enzymes responsible for metabolism of cannabidiol by human liver microsomes.<br>Jiang RR, Yamaori S, Takeda S, Yamamoto I, Watanabe K<br>Life Sciences 2011<br>89(5-6): 165-170 doi: 10.1016/j.lfs.2011.05.018                                                                                                                 | Web of Science                     | Discard<br>Reasons:<br>Not of interest |
| 407. | Immune Responses Regulated by Cannabidiol<br>Nichols JM, Kaplan BLF<br>Cannabis Cannabinoid Res. 2020<br>5(1): 12–31 doi: 10.1089/can.2018.0073                                                                                                                                                                                                                  | Pubmed<br>Scopus                   | Discard<br>Reasons:<br>Not of interest |
| 408. | Immune system modulation in the central nervous system; a possible role for endocannabinoids<br>Abd-Allah ARA<br>Saudi Pharmaceutical Journal 2007<br>15(1):1-15                                                                                                                                                                                                 | Scopus                             | Discard<br>Reasons:<br>Not of interest |
| 409. | Immunomodulatory effects of orally administered cannabinoids in multiple sclerosis.<br>Killestein J, Hoogervorst ELJ, Reif M, Blauw B, Smits M, Uitdehaag BMJ, Nagelkerken L, Polman CH<br>Journal of Neuroimmunology 2003<br>137(1-2): 140-143 doi: 10.1016/S0165-5728(03)00045-6                                                                               | Scopus<br>Web of Science           | Keep                                   |

|      |                                                                                                                                                                                                                                                                                                                      |                                    |                                         |
|------|----------------------------------------------------------------------------------------------------------------------------------------------------------------------------------------------------------------------------------------------------------------------------------------------------------------------|------------------------------------|-----------------------------------------|
| 410. | Immunosuppressive Effects of Cannabidiol in Mild and Moderate Disease States of Experimental Autoimmune Encephalomyelitis.<br>Nichols JM, Gilfeather K, Yray G, Kummari E, Dhital S, Kaplan BLF<br>Journal of Neuroimmune Pharmacology 2017<br>Meeting Abstract: W41 12: S36-S36 Supplement: 1                       | Web of Science                     | Discard<br>Reasons:<br>Not of interest. |
| 411. | Impact of Sativex(®) on quality of life and activities of daily living in patients with multiple sclerosis spasticity<br>Arroyo R, Vila C, Dechant KL.<br>J Comp Eff Res. 2014<br>3(4):435-44. doi: 10.2217/ce.14.30. Review                                                                                         | Pubmed<br>Scopus                   | Discard<br>Reasons:<br>Not of interest  |
| 412. | IMPORTANCE OF CANNABINOIDS IN THE FUNCTIONING OF THE CENTRAL NERVOUS SYSTEM.<br>Wroblewska-Luczka P, Florek-Luszczki M, Luszczki JJ<br>HEALTH PROBLEMS OF CIVILIZATION 2018<br>12(3): 223-230 DOI: 10.5114/hpc.2018.75688                                                                                            | Web of Science                     | Discard<br>Reasons:<br>Not of interest  |
| 413. | Industry update covering April 2018<br>Simpson I<br>Therapeutic Delivery 2018<br>9(9):609-616 doi:10.4155/tde-2018-0039                                                                                                                                                                                              | Scopus                             | Discard<br>Reasons:<br>Not of interest  |
| 414. | Influence of Previous Failed Antispasticity Therapy on the Efficacy and Tolerability of THC:CBD Oromucosal Spray for Multiple Sclerosis Spasticity<br>Haupts M, Vila C, Jonas A, Witte K, Álvarez-Ossorio L.<br>Eur Neurol. 2016<br>75(5-6):236-43. doi: 10.1159/000445943.                                          | Pubmed<br>Scopus                   | Discard<br>Reasons:<br>Not of interest  |
| 415. | Inhibitory effect of standardized cannabis sativa extract and its ingredient cannabidiol on rat and human bladder contractility<br>Capasso R, Aviello G, Borrelli F, Romano B, Ferro M, Castaldo L, Montanaro V, Altieri V, Izzo AA.<br>Urology. 2011<br>77(4):1006.e9-1006.e15. doi: 10.1016/j.urology.2010.12.006. | Pubmed<br>Scopus<br>Web of Science | Discard<br>Reasons:<br>Not of interest  |
| 416. | Initial experiences with medicinal extracts of cannabis for chronic pain: results from 34 'N of 1' studies<br>Notcutt W, Price M, Miller R, Newport S, Phillips C, Simmons S, Sansom C.<br>Anaesthesia. 2004<br>59(5):440-52. doi: 10.1111/j.1365-2044.2004.03674.x                                                  | Pubmed<br>Scopus<br>Web of Science | Discard<br>Reasons:<br>Not of interest  |
| 417. | Integrative therapies for multiple sclerosis<br>Maker-Clark G, Patel S                                                                                                                                                                                                                                               | Scopus                             | Discard<br>Reasons:                     |

|      |                                                                                                                                                                                                                                                                                                  |                                    |                                        |
|------|--------------------------------------------------------------------------------------------------------------------------------------------------------------------------------------------------------------------------------------------------------------------------------------------------|------------------------------------|----------------------------------------|
|      | Disease-a-Month 2013<br>59(8):290-301 doi:10.1016/j.disamonth.2013.03.017                                                                                                                                                                                                                        |                                    | Not of interest                        |
| 418. | Interaction between the protective effects of cannabidiol and palmitoylethanolamide in experimental model of multiple sclerosis in C57BL/6 mice<br>Rahimi A, Faizi M, Talebi F, Noorbakhsh F, Kahrizi F, Naderi N.<br>Neuroscience. 2015<br>290:279-87. doi: 10.1016/j.neuroscience.2015.01.030. | Pubmed<br>Scopus<br>Web of Science | Keep                                   |
| 419. | Interactions between THC and cannabidiol in mouse models of cannabinoid activity.<br>Varvel SA, Wiley JL, Yang R, Bridgen DT, Long K, Lichtman AH, Martin BR<br>Psychopharmacology 2006<br>186(2): 226-234 doi: 10.1007/s00213-006-0356-9                                                        | Web of Science                     | Discard<br>Reasons:<br>Not of interest |
| 420. | Is cannabidiol a promising substance for new drug development? A review of its potential therapeutic applications<br>Noreen N, Muhammad F, Akhtar B, Azam F, Anwar MI<br>Critical Reviews in Eukaryotic Gene Expression 2018<br>28(1):73-86 doi:10.1615/CritRevEukaryotGeneExpr.2018021528       | Scopus<br>Web of Science           | Discard<br>Reasons:<br>Not of interest |
| 421. | Is the Clinical Use of Cannabis by Oncology Patients Advisable?<br>Bar-Sela G, Avisar A, Batash R, Schaffer M<br>Current Medicinal Chemistry 2014<br>21(17): 1923-1930 doi: 10.2174/0929867321666140304151323                                                                                    | Web of Science                     | Discard<br>Reasons:<br>Not of interest |
| 422. | Is the medical use of cannabis a therapeutic option for children?<br>Rieder MJ, Canadian Paediat Soc; Canadian Paediat Soc; Drug Therapy Hazardous Subst Comm.<br>PAEDIATRICS & CHILD HEALTH 2016<br>21(1): 31-34 doi: 10.1093/pch/21.1.31                                                       | Web of Science                     | Discard<br>Reasons:<br>Not of interest |
| 423. | Is There a Legitimate Role for the Therapeutic Use of Cannabinoids for Symptom Management in Chronic Kidney Disease?<br>Davison SN, Davison JS<br>Journal of Pain and Symptom Management 2011<br>41(4): 768-778 doi: 10.1016/j.jpainsymman.2010.06.016                                           | Web of Science                     | Discard<br>Reasons:<br>Not of interest |
| 424. | Is there a need for weed? The role of cannabinoids in managing neuropathic pain<br>No author name available<br>Drugs and Therapy Perspectives 2009<br>25(4):11-13 doi:10.2165/0042310-200925040-00004                                                                                            | Scopus                             | Discard<br>Reasons:<br>Not of interest |
| 425. | Is there any clinically relevant cannabinoid-induced analgesia?<br>Kraft B<br>Pharmacology 2012                                                                                                                                                                                                  | Scopus                             | Discard<br>Reasons:<br>Not of interest |

|      |                                                                                                                                                                                                                                                                                                            |                                    |                                        |
|------|------------------------------------------------------------------------------------------------------------------------------------------------------------------------------------------------------------------------------------------------------------------------------------------------------------|------------------------------------|----------------------------------------|
|      | 89(5-6):237-246 doi:10.1159/000337376                                                                                                                                                                                                                                                                      |                                    |                                        |
| 426. | Issues for pharmacists when patients use cannabis therapeutically at home<br>Green A<br>Pharmaceutical Journal 2012<br>289(7731):531-532                                                                                                                                                                   | Scopus                             | Discard<br>Reasons:<br>Not of interest |
| 427. | Italian Consensus on treatment of spasticity in multiple sclerosis<br>Comi G, Solari A, Leocani L, Centonze D, Otero-Romero S Italian Consensus Group on treatment of spasticity in multiple sclerosis.<br>Eur J Neurol. 2019 doi: 10.1111/ene.14110.                                                      | Pubmed<br>Web of Science           | Discard<br>Reasons:<br>Not of interest |
| 428. | Key considerations in reimbursement decision-making for multiple sclerosis drugs in Australia<br>Phan YHL, De Abreu Lourenco R, Haas M, van der Linden N.<br>Mult Scler Relat Disord. 2018<br>25:144-149. doi: 10.1016/j.msard.2018.07.020.                                                                | Pubmed<br>Scopus<br>Web of Science | Discard<br>Reasons:<br>Not of interest |
| 429. | Lack of effect of cannabis-based treatment on clinical and laboratory measures in multiple sclerosis<br>Centonze D, Mori F, Koch G, Buttari F, Codecà C, Rossi S, Cencioni MT, Bari M, Fiore S, Bernardi G, Battistini L, Maccarrone M.<br>Neurol Sci. 2009<br>30(6):531-4. doi: 10.1007/s10072-009-0136-5 | Pubmed<br>Scopus<br>Web of Science | Keep                                   |
| 430. | Latest advances in cannabinoid receptor agonists<br>Thakur GA, Tichkule R, Bajaj S, Makriyannis A<br>Expert Opinion on Therapeutic Patents 2009<br>19(12):1647-1673 doi:10.1517/13543770903436505                                                                                                          | Scopus                             | Discard<br>Reasons:<br>Not of interest |
| 431. | Legalizing marijuana<br>Leyton M<br>Journal of Psychiatry and Neuroscience 2016<br>41(2):75-76 doi:10.1503/jpn.160012                                                                                                                                                                                      | Scopus                             | Discard<br>Reasons:<br>Not of interest |
| 432. | Lipid sensing G protein-coupled receptors in the CNS<br>Dev KK, Irving AJ<br>Neuropharmacology 2017<br>113:595-596 doi:10.1016/j.neuropharm.2016.10.030                                                                                                                                                    | Scopus                             | Discard<br>Reasons:<br>Not of interest |
| 433. | Long-term assessment of the cognitive effects of nabiximols in patients with multiple sclerosis: A pilot study<br>Alessandria G, Meli R, Infante MT, Vestito L, Capello E, Bandini F.<br>Clin Neurol Neurosurg. 2020<br>196:105990 doi: 10.1016/j.clineuro.2020.105990                                     | Pubmed<br>Scopus                   | Discard<br>Reasons:<br>Not of interest |

|      |                                                                                                                                                                                                                                                                                                                                 |                                    |                                        |
|------|---------------------------------------------------------------------------------------------------------------------------------------------------------------------------------------------------------------------------------------------------------------------------------------------------------------------------------|------------------------------------|----------------------------------------|
| 434. | Long-Term Data of Efficacy, Safety, and Tolerability in a Real-Life Setting of THC/CBD Oromucosal Spray-Treated Multiple Sclerosis Patients<br>Paolicelli D, Dorenzo V, Manni A, D'Onghia M, Tortorella C, Zoccolella S, Di Lecce V, Iaffaldano A, Trojano M.<br>J Clin Pharmacol. 2016<br>56(7):845-51. doi: 10.1002/jcph.670. | Pubmed<br>Scopus<br>Web of Science | Discard<br>Reasons:<br>Not of interest |
| 435. | Long-term effectiveness and safety of nabiximols (tetrahydrocannabinol/cannabidiol oromucosal spray) in clinical practice<br>Flachenecker P, Henze T, Zettl UK.<br>Eur Neurol. 2014<br>72(1-2):95-102. doi: 10.1159/000360285.                                                                                                  | Pubmed<br>Scopus<br>Web of Science | Discard<br>Reasons:<br>Not of interest |
| 436. | Lost in the Haze: The Physician's Role in Cannabinoid Prescribing and Advising<br>Am J Med 2020<br>133(1):7-8. doi: 10.1016/j.amjmed.2019.05.049.                                                                                                                                                                               | Scopus                             | Discard<br>Reasons:<br>Not of interest |
| 437. | Lower Urinary Tract Dysfunction in Multiple Sclerosis<br>Seth JH, Sahai A, Panicker JN<br>Current Bladder Dysfunction Reports 2012<br>7(2):97-104 doi:10.1007/s11884-012-0129-8                                                                                                                                                 | Scopus                             | Discard<br>Reasons:<br>Not of interest |
| 438. | Management of lower urinary tract dysfunction in multiple sclerosis: A systematic review and Turkish consensus report<br>Çetinel B, Tarcan T, Demirkesen O, Özyurt C, Şen I, Erdoğan S, Siva A<br>Neurourology and Urodynamics 2013<br>32(8):1047-1057 doi:10.1002/nau.22374                                                    | Scopus                             | Discard<br>Reasons:<br>Not of interest |
| 439. | Management of neurogenic bladder in patients with multiple sclerosis<br>Phé V, Chartier-Kastler E, Panicker JN<br>Nature Reviews Urology 2016<br>13(5):275-288 doi:10.1038/nrrol.2016.53                                                                                                                                        | Scopus                             | Discard<br>Reasons:<br>Not of interest |
| 440. | Management of pain in multiple sclerosis: A pharmacological approach<br>Solaro C, Messmer Uccelli M<br>Nature Reviews Neurology 2011<br>7(9):519-527 doi:10.1038/nrneuro.2011.120                                                                                                                                               | Scopus                             | Discard<br>Reasons:<br>Not of interest |
| 441. | Managing neuropathic pain with Sativex®: A review of its pros and cons<br>Perez J, Ribera MV<br>Expert Opinion on Pharmacotherapy 2008,<br>9(7):1189-1195 doi:10.1517/14656566.9.7.1189                                                                                                                                         | Scopus                             | Discard<br>Reasons:<br>Not of interest |
| 442. | Marihuana and cannobinoids as medicaments. [Marihuana i kanabinoidy jako leki.]<br>Tkaczyk M, Florek E, Piekoszewski W                                                                                                                                                                                                          | Pubmed<br>Scopus                   | Discard<br>Reasons:                    |



|      |                                                                                                                                                                                                                                                                                                                                     |                                    |                                        |
|------|-------------------------------------------------------------------------------------------------------------------------------------------------------------------------------------------------------------------------------------------------------------------------------------------------------------------------------------|------------------------------------|----------------------------------------|
|      | Przegląd lekarski 2012<br>69(10):1095-1097                                                                                                                                                                                                                                                                                          |                                    | Not of interest                        |
| 443. | Marihuana: Medicine, addictive substance, or both? A common-sense approach to the place of cannabis in medicine<br>Kalant H<br>CJAM Canadian Journal of Addiction Medicine 2013<br>4(3):4-8                                                                                                                                         | Scopus                             | Discard<br>Reasons:<br>Not of interest |
| 444. | Marijuana legalization: Impact on physicians and public health<br>Wilkinson ST, Yarnell S, Radhakrishnan R, Ball SA, D'Souza DC<br>Annual Review of Medicine 2016<br>67:453-466 doi:10.1146/annurev-med-050214-013454                                                                                                               | Scopus                             | Discard<br>Reasons:<br>Not of interest |
| 445. | Marijuana use in America: Whither are we bound?<br>Devane CL<br>Pharmacotherapy 2013<br>3(10):1009-1011 doi:10.1002/phar.1363                                                                                                                                                                                                       | Scopus                             | Discard<br>Reasons:<br>Not of interest |
| 446. | Marijuana: Modern medical chimaera<br>Lamarine RJ<br>Journal of Drug Education 2012<br>42(1):1-11 doi:10.2190/DE.42.1.a                                                                                                                                                                                                             | Scopus                             | Discard<br>Reasons:<br>Not of interest |
| 447. | Mechanisms and pharmacology of neuropathic pain in multiple sclerosis<br>Iannitti T, Kerr BJ, Taylor BK<br>Current Topics in Behavioral Neurosciences 2014<br>20:75-97 doi:10.1007/7854_2014_288                                                                                                                                    | Scopus                             | Discard<br>Reasons:<br>Not of interest |
| 448. | Mechanisms of action of cannabidiol in adoptively transferred experimental autoimmune encephalomyelitis<br>González-García C, Torres IM, García-Hernández R, Campos-Ruiz L, Esparragoza LR, Coronado MJ, Grande AG, García-Merino A, Sánchez López AJ.<br>Exp Neurol. 2017<br>298(Pt A):57-67. doi: 10.1016/j.expneurol.2017.08.017 | Pubmed<br>Scopus<br>Web of Science | Keep                                   |
| 449. | Medical cannabinoids<br>McLeod SA, Lemay J-F<br>CMAJ 2017<br>189(30):E995 doi:10.1503/cmaj.161395                                                                                                                                                                                                                                   | Scopus                             | Discard<br>Reasons:<br>Not of interest |
| 450. | Medical cannabis – The Canadian perspective<br>Ko GD, Bober SL, Mindra S, Moreau JM<br>Journal of Pain Research 2016,<br>9:735-744 doi:10.2147/JPR.S98182                                                                                                                                                                           | Scopus                             | Discard<br>Reasons:<br>Not of interest |

|      |                                                                                                                                                                                                                                     |                                    |                                        |
|------|-------------------------------------------------------------------------------------------------------------------------------------------------------------------------------------------------------------------------------------|------------------------------------|----------------------------------------|
| 451. | Medical cannabis and cannabinoids in rheumatology: where are we now?<br>Expert Review of Clinical Immunology 2019<br>15(10):1019-1032 doi:10.1080/1744666X.2019.1665997                                                             | Scopus                             | Discard<br>Reasons:<br>Not of interest |
| 452. | Medical cannabis: Pharmacy focus on treatment options for neurologic conditions<br>Berlekamp D<br>U.S. Pharmacist 2016<br>41(1):45-49                                                                                               | Scopus                             | Discard<br>Reasons:<br>Not of interest |
| 453. | Medical cannabis: Time for clear thinking<br>Penington DG<br>Medical Journal of Australia 2015<br>202(2):74-76 doi:10.5694/mja14.01573                                                                                              | Scopus                             | Discard<br>Reasons:<br>Not of interest |
| 454. | Medical cannabis: What practitioners need to know<br>Van Rensburg R, Pillay-Fuentes Lorente V, Blockman M, Moodley K, Wilmschurst JM, Decloedt EH.<br>S Afr Med J. 2020<br>110(3):192-196 doi:10.7196/SAMJ.2020.v110i3.14403        | Pubmed<br>Web of Science           | Discard<br>Reasons:<br>Not of interest |
| 455. | Medical Marijuana and Chronic Pain: a Review of Basic Science and Clinical Evidence.<br>Jensen B, Chen J, Furnish T, Wallace M<br>CURRENT PAIN AND HEADACHE REPORTS 2015<br>19(10):50 DOI: 10.1007/s11916-015-0524-x                | Web of Science                     | Discard<br>Reasons:<br>Not of interest |
| 456. | Medical marijuana and pain management<br>Temple LM<br>Disease-a-Month 2016<br>62(9):346-352 doi:10.1016/j.disamonth.2016.05.014                                                                                                     | Scopus                             | Discard<br>Reasons:<br>Not of interest |
| 457. | Medical marijuana for cancer<br>Kramer JL<br>CA Cancer Journal for Clinicians 2015<br>65(2):110-122 doi:10.3322/caac.21260                                                                                                          | Pubmed<br>Scopus<br>Web of Science | Discard<br>Reasons:<br>Not of interest |
| 458. | Medical marijuana for the treatment of vismodegib-related muscle spasm<br>Yuan JT, Tello TL, Hultman C, Barker CA, Arron ST, Yom SS.<br>JAAD Case Rep. 2017<br>3(5):438-440. doi: 10.1016/j.jdcr.2017.06.012.                       | Pubmed                             | Discard<br>Reasons:<br>Not of interest |
| 459. | Medical marijuana for treatment of chronic pain and other medical and psychiatric problems: A clinical review<br>Hill KP<br>JAMA - Journal of the American Medical Association 2015<br>313(24):2474-2483 doi:10.1001/jama.2015.6199 | Scopus                             | Discard<br>Reasons:<br>Not of interest |

|      |                                                                                                                                                                                                                                                                                                              |                                    |                                        |
|------|--------------------------------------------------------------------------------------------------------------------------------------------------------------------------------------------------------------------------------------------------------------------------------------------------------------|------------------------------------|----------------------------------------|
| 460. | Medical marijuana in neurology<br>Benbadis SR, Sanchez-Ramos J, Bozorg A, Giarratano M, Kalidas K, Katzin L, Robertson D, Vu T, Smith A, Zesiewicz T<br>Expert Review of Neurotherapeutics 2014<br>14(12):1453-1465 doi:10.1586/14737175.2014.985209                                                         | Pubmed<br>Scopus<br>Web of Science | Discard<br>Reasons:<br>Not of interest |
| 461. | Medical Marijuana is legal in most states, but physicians have little evidence to guide them<br>JAMA - Journal of the American Medical Association 2017<br>317(16):1611-1613 doi:10.1001/jama.2017.0813                                                                                                      | Scopus                             | Discard<br>Reasons:<br>Not of interest |
| 462. | Medical marijuana patient counseling points for health care professionals based on trends in the medical uses, efficacy, and adverse effects of cannabis-based pharmaceutical drugs<br>Parmar JR, Forrest BD, Freeman RA.<br>Res Social Adm Pharm. 2016<br>12(4):638-54. doi: 10.1016/j.sapharm.2015.09.002. | Pubmed<br>Scopus<br>Web of Science | Discard<br>Reasons:<br>Not of interest |
| 463. | Medical marijuana potential and pitfalls<br>Zanni GR<br>Pharmacy Times 2013<br>79:3                                                                                                                                                                                                                          | Scopus                             | Discard<br>Reasons:<br>Not of interest |
| 464. | Medical marijuana<br>Gloss DS, Maa EH<br>Neurology: Clinical Practice 2015<br>5(4):281-284 doi:10.1212/CPJ.0000000000000159                                                                                                                                                                                  | Scopus                             | Discard<br>Reasons:<br>Not of interest |
| 465. | Medical marijuana: Clearing away the smoke<br>Grant I, Hampton Atkinson J, Gouaux B, Wilsey B<br>Open Neurology Journal 2012<br>6(1):18-25 doi:10.2174/1874205X01206010018                                                                                                                                   | Scopus                             | Discard<br>Reasons:<br>Not of interest |
| 466. | Medical marijuana: Do the benefits outweigh the risks?<br>Gupta S, Phalen T, Gupta S<br>Current Psychiatry 2018<br>17(1):34-41                                                                                                                                                                               | Scopus                             | Discard<br>Reasons:<br>Not of interest |
| 467. | Medical Use of Cannabinoids<br>Fraguas-Sánchez AI, Torres-Suárez AI<br>Drugs 2018<br>78(16):1665-1703 doi:10.1007/s40265-018-0996-1                                                                                                                                                                          | Pubmed<br>Scopus<br>Web of Science | Discard<br>Reasons:<br>Not of interest |
| 468. | Medical use of cannabis products Lessons to be learned from Israel and Canada.<br>Ablin J, Ste-Marie PA, Schafer M, Hauser W, Fitzcharles MA<br>SCHMERZ 2016<br>30(1): 3-13 doi: 10.1007/s00482-015-0083-4                                                                                                   | Pubmed<br>Scopus<br>Web of Science | Discard<br>Reasons:<br>Not of interest |

|      |                                                                                                                                                                                                                                                                        |                          |                                        |
|------|------------------------------------------------------------------------------------------------------------------------------------------------------------------------------------------------------------------------------------------------------------------------|--------------------------|----------------------------------------|
| 469. | Medical use of cannabis. Cannabidiol: A new light for schizophrenia?<br>Deiana S<br>Drug Testing and Analysis 2013<br>5(1):46-51 doi:10.1002/dta.1425                                                                                                                  | Scopus                   | Discard<br>Reasons:<br>Not of interest |
| 470. | Medical use of cannabis: An addiction medicine perspective<br>Cook J, Lloyd-Jones DM, Ogden E, Bonomo Y<br>Internal Medicine Journal 2015,<br>45(6):677-680 doi:10.1111/imj.12761                                                                                      | Scopus                   | Discard<br>Reasons:<br>Not of interest |
| 471. | Medical use of marijuana: Truth in evidence<br>Naguib M, Foss JF<br>Anesthesia and Analgesia 2015<br>121(5):1124-1127 doi:10.1213/ANE.0000000000000928                                                                                                                 | Scopus                   | Discard<br>Reasons:<br>Not of interest |
| 472. | Medicinal cannabis [Medicinale cannabis]<br>Van Der Meersch H, Verschuere AP, Bottriaux F<br>Farmaceutisch Tijdschrift voor België 2006<br>83(3):3-12                                                                                                                  | Scopus                   | Discard<br>Reasons:<br>Not of interest |
| 473. | Medicinal cannabis extracts for the treatment of multiple sclerosis<br>Smith PF.<br>Curr Opin Investig Drugs. 2004<br>5(7):727-30                                                                                                                                      | Pubmed<br>Scopus         | Discard<br>Reasons:<br>Not of interest |
| 474. | Medicinal cannabis in oncology practice: Still a bridge too far?<br>De Jong FA, Engels FK, Mathijssen RHJ, Van Zuylen L, Verweij J, Peters RPH,<br>Sparreboom A<br>Journal of Clinical Oncology 2005<br>23(13):2886-2891 doi:10.1200/JCO.2005.04.150                   | Scopus                   | Discard<br>Reasons:<br>Not of interest |
| 475. | Medicinal cannabis<br>Murnion B<br>Australian Prescriber 2015<br>38(6):212-215 doi:10.18773/austprescr.2015.072                                                                                                                                                        | Scopus<br>Web of Science | Discard<br>Reasons:<br>Not of interest |
| 476. | Medicinal cannabis: History, pharmacology, and implications for the acute care setting<br>Bridgeman MB, Abazia DT<br>P and T 2017<br>42(3):180-188                                                                                                                     | Scopus                   | Discard<br>Reasons:<br>Not of interest |
| 477. | Medicinal cannabis: is Delta(9)-tetrahydrocannabinol necessary for all its effects?.<br>Wilkinson JD, Whalley BJ, Baker D, Pryce G, Constanti A, Gibbons S, Williamson EM<br>JOURNAL OF PHARMACY AND PHARMACOLOGY 2003<br>55(12): 1687-1694 DOI: 10.1211/0022357022304 | Web of Science           | Discard<br>Reasons:<br>Not of interest |

|      |                                                                                                                                                                                                                                                                                                                                                                                    |                                    |                                        |
|------|------------------------------------------------------------------------------------------------------------------------------------------------------------------------------------------------------------------------------------------------------------------------------------------------------------------------------------------------------------------------------------|------------------------------------|----------------------------------------|
| 478. | Medicinal plants and dementia therapy: Herbal hopes for brain aging?<br>Perry E, Howes M-JR<br>CNS Neuroscience and Therapeutics 2011<br>17(6):683-698 doi:10.1111/j.1755-5949.2010.00202.x                                                                                                                                                                                        | Scopus                             | Discard<br>Reasons:<br>Not of interest |
| 479. | Medicinal use of cannabis based products and cannabinoids<br>Freeman TP, Hindocha C, Green SF, Bloomfield MAP<br>BMJ (Online) 2019<br>365:l1141 doi:10.1136/bmj.l1141                                                                                                                                                                                                              | Scopus                             | Discard<br>Reasons:<br>Not of interest |
| 480. | Medicinal use of cannabis in the United States: Historical perspectives, current trends, and future directions<br>Aggarwal SK, Carter GT, Sullivan MD, ZumBrunnen C, Morrill R, Mayer JD<br>Journal of Opioid Management 2009<br>5(3):153-168                                                                                                                                      | Scopus                             | Discard<br>Reasons:<br>Not of interest |
| 481. | Medicinal Uses of Marijuana and Cannabinoids<br>Grotenhermen F, Muller-Vahl K<br>Critical Reviews in Plant Sciences 2016<br>35(5-6):378-405 doi:10.1080/07352689.2016.1265360                                                                                                                                                                                                      | Scopus<br>Web of Science           | Discard<br>Reasons:<br>Not of interest |
| 482. | Medium and long term efficacy of nabiximols for the treatment of multiple sclerosis related spasticity: an Italian monocentric study.<br>Ferre L, Nuara A, Pavan G, Radaelli M, Moiola L, Rodegher M, Colombo B, Sarmiento IJK, Martinelli V, Leocani L, Comi G, Boneschi FM, Esposito F<br>MULTIPLE SCLEROSIS JOURNAL 2015<br>Meeting Abstract: EP1393 21: 728-729 Supplement: 11 | Web of Science                     | Discard<br>Reasons:<br>Not of interest |
| 483. | Meta-analysis of cannabis based treatments for neuropathic and multiple sclerosis-related pain<br>Iskedjian M, Bereza B, Gordon A, Piwko C, Einarson TR.<br>Curr Med Res Opin. 2007<br>23(1):17-24 doi: 10.1185/030079906X158066                                                                                                                                                   | Pubmed<br>Scopus<br>Web of Science | Discard<br>Reasons:<br>Not of interest |
| 484. | Meta-analysis of the efficacy and safety of Sativex (nabiximols), on spasticity in people with multiple sclerosis<br>Wade DT, Collin C, Stott C, Duncombe P.<br>Mult Scler. 2010 Jun 16(6):707-14. doi: 10.1177/1352458510367462                                                                                                                                                   | Pubmed<br>Scopus<br>Web of Science | Discard<br>Reasons:<br>Not of interest |
| 485. | Microarray and Pathway Analysis Reveal Distinct Mechanisms Underlying Cannabinoid-Mediated Modulation of LPS-Induced Activation of BV-2 Microglial Cells.<br>Juknat A, Pietr M, Kozela E, Rimmerman N, Levy R, Gao FY, Coppola G, Geschwind D, Vogel Z<br>PLOS ONE 2013                                                                                                            | Web of Science                     | Discard<br>Reasons:<br>Not of interest |

|      |                                                                                                                                                                                                                                                                                                                                                                                                         |                                    |                                        |
|------|---------------------------------------------------------------------------------------------------------------------------------------------------------------------------------------------------------------------------------------------------------------------------------------------------------------------------------------------------------------------------------------------------------|------------------------------------|----------------------------------------|
|      | 8(4): e61462 DOI: 10.1371/journal.pone.0061462                                                                                                                                                                                                                                                                                                                                                          |                                    |                                        |
| 486. | Modulating the endocannabinoid system in human health and disease - Successes and failures<br>Pacher P, Kunos G<br>FEBS Journal 2013<br>280(9):1918-1943 doi:10.1111/febs.12260                                                                                                                                                                                                                         | Scopus                             | Discard<br>Reasons:<br>Not of interest |
| 487. | Modulation of Astrocyte Activity by Cannabidiol, a Nonpsychoactive Cannabinoid.<br>Kozela E, Juknat A, Vogel Z<br>INTERNATIONAL JOURNAL OF MOLECULAR SCIENCES 2017<br>18(8) Article Number: 1669 DOI: 10.3390/ijms18081669                                                                                                                                                                              | Pubmed<br>Scopus<br>Web of Science | Discard<br>Reasons:<br>Not of interest |
| 488. | Monotherapy with nabiximols in multiple sclerosis-induced spasticity.<br>Koehler J, Gorodetzky H, Pollmann W, Meier M, Feneberg W<br>MULTIPLE SCLEROSIS JOURNAL 2013<br>19(11): 282-282 Supplement: S                                                                                                                                                                                                   | Web of Science                     | Discard<br>Reasons:<br>Not of interest |
| 489. | Multicenter, Double-Blind, Randomized, Placebo-Controlled, Parallel-Group Study of the Efficacy, Safety, and Tolerability of THC:CBD Extract and THC Extract in Patients with Intractable Cancer-Related Pain.<br>Johnson JR, Burnell-Nugent M, Lossignol D, Ganae-Motan ED, Potts R, Fallon MT<br>JOURNAL OF PAIN AND SYMPTOM MANAGEMENT 2010<br>39(2): 167-179 DOI: 10.1016/j.jpainsymman.2009.06.008 | Web of Science                     | Discard<br>Reasons:<br>Not of interest |
| 490. | Multiple sclerosis and pain<br>Nick ST, Robertsa C, Billiodeaux S, Davis DE, Zamanifekri B, Sahraian, MA, Alekseeva N, Munjampalli S, Roberts J, Minagar A<br>Neurological Research 2012<br>34(9):829-841 doi:10.1179/1743132812Y.0000000082                                                                                                                                                            | Scopus                             | Discard<br>Reasons:<br>Not of interest |
| 491. | Multiple sclerosis and the blood-central nervous system barrier<br>Palmer AM.<br>Cardiovascular Psychiatry and Neurology 2013<br>2013:530356 doi:10.1155/2013/530356                                                                                                                                                                                                                                    | Pubmed<br>Scopus                   | Discard<br>Reasons:<br>Not of interest |
| 492. | Multiple sclerosis guideline production takes off<br>Maurice J<br>The Lancet 2014<br>384(9958):1914-1915 doi:10.1016/S0140-6736(14)62265-0                                                                                                                                                                                                                                                              | Scopus                             | Discard<br>Reasons:<br>Not of interest |
| 493. | Multiple sclerosis spasticity management-key publications<br>Gold R<br>Expert Review of Neurotherapeutics 2013<br>13(12)SUPPL.:47-48 doi:10.1586/14737175.2013.865875                                                                                                                                                                                                                                   | Scopus                             | Discard<br>Reasons:<br>Not of interest |

|      |                                                                                                                                                                                                                                                                                                                             |                                    |                                        |
|------|-----------------------------------------------------------------------------------------------------------------------------------------------------------------------------------------------------------------------------------------------------------------------------------------------------------------------------|------------------------------------|----------------------------------------|
| 494. | Multiple sclerosis spasticity symptoms management. Endocannabinoid system modulator data beyond clinical trials. Foreword<br>Trojano M.<br>Expert Rev Neurother. 2013<br>13(3 Suppl 1):1. doi: 10.1586/ern.13.2. No abstract available.                                                                                     | Pubmed<br>Scopus                   | Discard<br>Reasons:<br>Not of interest |
| 495. | Multiple sclerosis symptoms and spasticity management: new data<br>Izquierdo G<br>Neurodegenerative disease management 2017<br>7(6):7-11 doi:10.2217/nmt-2017-0034                                                                                                                                                          | Pubmed<br>Scopus<br>Web of Science | Discard<br>Reasons:<br>Not of interest |
| 496. | Multiple sclerosis treatment options<br>Hedley L<br>Pharmaceutical Journal 2012<br>288(7694):247-250                                                                                                                                                                                                                        | Scopus                             | Discard<br>Reasons:<br>Not of interest |
| 497. | Multiple sclerosis<br>Nafee T, Watanabe R, Fregni F<br>Neuromethods 2018<br>138(263):295 doi:10.1007/978-1-4939-7880-9 8                                                                                                                                                                                                    | Scopus                             | Discard<br>Reasons:<br>Not of interest |
| 498. | Multiple sclerosis: New insights and trends<br>Koriem KMM<br>Asian Pacific Journal of Tropical Biomedicine 2016<br>6(5):429-440 doi:10.1016/j.apjtb.2016.03.009                                                                                                                                                             | Scopus                             | Discard<br>Reasons:<br>Not of interest |
| 499. | Multiple sclerosis: Oromucosal spray relieves multiple sclerosis-induced spasms [Multiple sklerose: Oromukosalspray lindert ms-induzierte spasmen]<br>Bischoff M<br>Neurologie und Rehabilitation 2012<br>18(3):197                                                                                                         | Scopus                             | Discard<br>Reasons:<br>Not of interest |
| 500. | MyD88-dependent and -independent signalling via TLR3 and TLR4 are differentially modulated by Delta(9)-tetrahydrocannabinol and cannabidiol in human macrophages<br>Fitzpatrick J-M, Minogue E, Curham L, Tyrrell H, Gavigan P, Hind W, Downer EJ<br>J Neuroimmunol 2020<br>343:577217. doi: 10.1016/j.jneuroim.2020.577217 | Web of Science                     | Discard<br>Reasons:<br>Not of interest |
| 501. | Multiple sclerosis-related central pain disorders<br>Nurmikko TJ, Gupta S, Maclver K<br>Current Pain and Headache Reports 2010<br>14(3):189-195 doi:10.1007/s11916-010-0108-8                                                                                                                                               | Scopus                             | Discard<br>Reasons:<br>Not of interest |
| 502. | Nabilone increases choreatic movements in Huntington's disease.<br>Muller-Vahl KR, Schneider U, Emrich HM                                                                                                                                                                                                                   | Web of Science                     | Discard<br>Reasons:                    |

|      |                                                                                                                                                                                                                                                                                                                                                                                                                                                                                                                                                                                                                                          |                                    |                                        |
|------|------------------------------------------------------------------------------------------------------------------------------------------------------------------------------------------------------------------------------------------------------------------------------------------------------------------------------------------------------------------------------------------------------------------------------------------------------------------------------------------------------------------------------------------------------------------------------------------------------------------------------------------|------------------------------------|----------------------------------------|
|      | MOVEMENT DISORDERS 1999<br>14(6): 1038-1040 doi: 10.1002/1531-8257(199911)14:6<1038::AID-MDS1024>3.0.CO;2-7                                                                                                                                                                                                                                                                                                                                                                                                                                                                                                                              |                                    | Not of interest                        |
| 503. | Nabiximols (THC/CBD Oromucosal Spray, Sativex (R)) in Clinical Practice - Results of a Multicenter, Non-Interventional Study (MOVE 2) in Patients with Multiple Sclerosis Spasticity.<br>Flachenecker P, Henze T, Zettl UK<br>EUROPEAN NEUROLOGY 2014<br>71(5-6):271-279 DOI: 10.1159/000357427                                                                                                                                                                                                                                                                                                                                          | Pubmed<br>Scopus<br>Web of Science | Discard<br>Reasons:<br>Not of interest |
| 504. | Nabiximols as an agonist replacement therapy during cannabis withdrawal: a randomized clinical trial<br>Allsop DJ, Copeland J, Lintzeris N, Dunlop AJ, Montebello M, Sadler C, Rivas GR, Holland RM, Muhleisen P, Norberg MM, Booth J, McGregor IS.<br>JAMA Psychiatry. 2014<br>71(3):281-91. doi: 10.1001/jamapsychiatry.2013.3947                                                                                                                                                                                                                                                                                                      | Pubmed<br>Scopus<br>Web of Science | Discard<br>Reasons:<br>Not of interest |
| 505. | Nabiximols discontinuation rate in a large population of patients with multiple sclerosis: a 18-month multicentre study<br>Chisari CG, Solaro C, Annunziata P, Bergamaschi R, Bianco A, Bonavita S, Brescia Morra V, Bruno Bossio R, Capello E, Castelli L, Cavalla P, Costantino G, Centonze D, Cottone S, Danni MC, Esposito F, Gajofatto A, Gasperini C, Guareschi A, Lanzillo R, Lus G, Maniscalco GT, Matta M, Paolicelli D, Petrucci L, Pontecorvo S, Righini I, Rovaris M, Sessa E, Spinicci G, Spitaleri D, Valentino P, Zaffaroni M, Zappia M, Patti F.<br>J Neurol Neurosurg Psychiatry. 2020<br>doi: 10.1136/jnnp-2019-322480 | Pubmed                             | Discard<br>Reasons:<br>Not of interest |
| 506. | Nabiximols for multiple sclerosis<br>[No authors listed]","Aust Prescr. 2018<br>41(6):203-204. doi: 10.18773/austprescr.2018.066.                                                                                                                                                                                                                                                                                                                                                                                                                                                                                                        | Pubmed                             | Discard<br>Reasons:<br>Not of interest |
| 507. | Nabiximols for Opioid-Treated Cancer Patients With Poorly-Controlled Chronic Pain: A Randomized, Placebo-Controlled, Graded-Dose Trial.<br>Portenoy RK, Ganæ-Motan ED, Allende S, Yanagihara R, Shaiova L, Weinstein S, McQuade R, Wright S, Fallon MT<br>JOURNAL OF PAIN 2012<br>13(5): 438-449 DOI: 10.1016/j.jpain.2012.01.003                                                                                                                                                                                                                                                                                                        | Web of Science                     | Discard<br>Reasons:<br>Not of interest |
| 508. | Nabiximols plus robotic assisted gait training in improving motor performances in people with Multiple Sclerosis<br>Calabrò RS, Russo M, Naro A, Ciurleo R, D'Aleo G, Rifìci C, Balletta T, La Via C, Destro M, Bramanti P, Sessa E                                                                                                                                                                                                                                                                                                                                                                                                      | Pubmed<br>Scopus<br>Web of Science | Discard<br>Reasons:<br>Not of interest |



|      |                                                                                                                                                                                                                                                                                                                         |                                    |                                        |
|------|-------------------------------------------------------------------------------------------------------------------------------------------------------------------------------------------------------------------------------------------------------------------------------------------------------------------------|------------------------------------|----------------------------------------|
|      | Mult Scler Relat Disord. 2020<br>43, 102177 doi: 10.1016/j.msard.2020.102177                                                                                                                                                                                                                                            |                                    |                                        |
| 509. | Nabiximols in the treatment of spasticity, pain and urinary symptoms due to multiple sclerosis<br>Podda G, Constantinescu CS.<br>Expert Opin Biol Ther. 2012<br>12(11):1517-31. doi: 10.1517/14712598.2012.721765.                                                                                                      | Pubmed<br>Scopus<br>Web of Science | Discard<br>Reasons:<br>Not of interest |
| 510. | N-arachidonoyl glycine, an abundant endogenous lipid, potently drives directed cellular migration through GPR18, the putative abnormal cannabidiol receptor.<br>McHugh D, Hu SSJ, Rimmerman N, Juknat A, Vogel Z, Walker JM, Bradshaw HB<br>BMC NEUROSCIENCE 2010<br>11 Article Number: 44 DOI: 10.1186/1471-2202-11-44 | Web of Science                     | Discard<br>Reasons:<br>Not of interest |
| 511. | Nasal administration of drugs as a new non-invasive strategy for efficient treatment of multiple sclerosis<br>Duchi S, Ovadia H, Touitou E.<br>J Neuroimmunol. 2013<br>258(1-2):32-40. doi: 10.1016/j.jneuroim.2013.02.013                                                                                              | Pubmed<br>Scopus<br>Web of Science | Keep                                   |
| 512. | Natural products as a potential modulator of microglial polarization in neurodegenerative diseases<br>Jin X, Liu M-Y, Zhang D-F, Zhong X, Du K, Qian P, Gao H, Wei M-J<br>Pharmacological Research 2019<br>145:104253 doi:10.1016/j.phrs.2019.104253                                                                    | Scopus                             | Discard<br>Reasons:<br>Not of interest |
| 513. | Natural products: Potential therapeutic agents in multiple sclerosis<br>Yu S, Liu M, Hu K<br>International Immunopharmacology 2019<br>67(87):97 doi:10.1016/j.intimp.2018.11.036                                                                                                                                        | Scopus                             | Discard<br>Reasons:<br>Not of interest |
| 514. | Naturally occurring and related synthetic cannabinoids and their potential therapeutic applications<br>Galal AM, Slade D, Gul W, El-Alfy AT, Ferreira D, Elsohly MA<br>Recent Patents on CNS Drug Discovery 2009<br>4(2):112-136 doi:10.2174/157488909788453031                                                         | Scopus                             | Discard<br>Reasons:<br>Not of interest |
| 515. | Neurological aspects of medical use of cannabidiol<br>Mannucci C, Navarra M, Calapai F, Ventura-Spagnolo E, Busardò FP, Cas RD, Ippolito FM, Calapai G<br>CNS and Neurological Disorders - Drug Targets 2017<br>16(5):541-553 doi:10.2174/1871527316666170413114210                                                     | Pubmed<br>Scopus<br>Web of Science | Discard<br>Reasons:<br>Not of interest |
| 516. | Neurological rehabilitation and the management of spasticity                                                                                                                                                                                                                                                            | Scopus                             | Discard                                |

|      |                                                                                                                                                                                                                                                                                                                |                                    |                                        |
|------|----------------------------------------------------------------------------------------------------------------------------------------------------------------------------------------------------------------------------------------------------------------------------------------------------------------|------------------------------------|----------------------------------------|
|      | Stevenson V, Playford D<br>Medicine (United Kingdom) 2012<br>40(9):513-517 doi:10.1016/j.mpmed.2012.06.008                                                                                                                                                                                                     |                                    | Reasons:<br>Not of interest            |
| 517. | Neuronal preservation and reactive gliosis attenuation following neonatal sciatic nerve axotomy by a fluorinated cannabidiol derivative.<br>Perez M, Cartarozzi LP, Chiarotto GB, de Oliveira SA, Guimaraes FS, de Oliveira ALR<br>NEUROPHARMACOLOGY 2018<br>140:201-208 DOI: 10.1016/j.neuropharm.2018.08.009 | Web of Science                     | Discard<br>Reasons:<br>Not of interest |
| 518. | Neurophysiological and subjective profile of marijuana with varying concentrations of cannabinoids.<br>Ilan AB, Gevins A, Coleman M, ElSohly MA, de Wit H<br>BEHAVIOURAL PHARMACOLOGY 2005<br>16(5-6): 487-497 DOI: 10.1097/00008877-200509000-00023                                                           | Web of Science                     | Discard<br>Reasons:<br>Not of interest |
| 519. | Neuroprotection in Experimental Autoimmune Encephalomyelitis and Progressive Multiple Sclerosis by Cannabis-Based Cannabinoids<br>Pryce G, Riddall DR, Selwood DL, Giovannoni G, Baker D.<br>J Neuroimmune Pharmacol. 2015<br>10(2):281-92. doi: 10.1007/s11481-014-9575-8.                                    | Pubmed<br>Scopus<br>Web of Science | Discard<br>Reasons:<br>Not of interest |
| 520. | Neuroprotective agents: Cannabinoids<br>Sánchez AJ, García-Merino A<br>Clinical Immunology 2012,<br>142(1):57-67 doi:10.1016/j.clim.2011.02.010                                                                                                                                                                | Scopus                             | Discard<br>Reasons:<br>Not of interest |
| 521. | Neuroprotective effect of cannabidiol on NTF-3 and IGF-1 genes expression<br>Miandashti N, Safaralizadeh R, Hosseinpourfeizi MA, Mahdavi M<br>Indian Journal of Traditional Knowledge 2019<br>18(4):739-743                                                                                                    | Scopus                             | Discard<br>Reasons:<br>Not of interest |
| 522. | Neuroprotective Effect of Cannabinoids in Neurodegenerative Diseases.<br>Suero-Garcia C, Martin-Banderas L, Holgado MA<br>ARS PHARMACEUTICA 2015<br>56(2): 77-87                                                                                                                                               | Web of Science                     | Discard<br>Reasons:<br>Not of interest |
| 523. | Neuroprotective effect of cannabidiol on NTF-3 and IGF-1 genes expression<br>Safaralizadeh R, Miandashti N, Hosseinpourfeizi MA, Mahdavi M<br>Indian Journal of Traditional Knowledge (IJTK) 2019<br>18(4):739-743                                                                                             | Web of Science                     | Discard<br>Reasons:<br>Not of interest |
| 524. | New and Emerging Medications for Treatment of Pediatric Epilepsy<br>M Scott Perry<br>Pediatr Neurol 2020                                                                                                                                                                                                       | Scopus                             | Discard<br>Reasons:<br>Not of interest |

|      |                                                                                                                                                                                                                                                                                                    |                                    |                                         |
|------|----------------------------------------------------------------------------------------------------------------------------------------------------------------------------------------------------------------------------------------------------------------------------------------------------|------------------------------------|-----------------------------------------|
|      | 107:24-27. doi: 10.1016/j.pediatrneurol.2019.11.008                                                                                                                                                                                                                                                |                                    |                                         |
| 525. | New approaches to pain management<br>Wilcock A<br>Progress in Palliative Care 2001<br>9(3):100-101 doi:10.1080/09699260.2001.11746914                                                                                                                                                              | Scopus                             | Discard<br>Reasons:<br>Not of interest  |
| 526. | New approaches to the treatment of inflammatory disease: Focus on small-molecule inhibitors of signal transduction pathways<br>Drugs in R and D 2008<br>9(6):397-434 doi:10.2165/0126839-200809060-00005                                                                                           | Scopus                             | Discard<br>Reasons:<br>Not of interest  |
| 527. | Newest evidence for tetrahydrocannabinol: cannabidiol oromucosal spray from randomized clinical trials<br>Markova J<br>NEURODEGENERATIVE DISEASE MANAGEMENT 2019<br>9:2 Supplement: S DOI: 10.2217/nmt-2018-0050                                                                                   | Pubmed<br>Scopus<br>Web of Science | Discard<br>Reasons:<br>Not of interest  |
| 528. | Newest evidence for tetrahydrocannabinol:cannabidiol oromucosal spray from postapproval pragmatic studies<br>Patti F.<br>Neurodegener Dis Manag. 2019<br>9(2s):3-7. doi: 10.2217/nmt-2018-0049.                                                                                                    | Pubmed<br>Web of Science           | Discard<br>Reasons:<br>Not of interest  |
| 529. | News about therapeutic use of Cannabis and endocannabinoid system [Novedades sobre las potencialidades terapéuticas del Cannabis y el sistema cannabinoide]<br>Duran M, Laporte JR, Capellà D<br>Medicina Clinica 2004<br>122(10):390-398 doi:10.1157/13059327                                     | Scopus                             | Discard<br>Reasons:<br>Not of interest  |
| 530. | NFKF is a synthetic fragment derived from rat hemopressin that protects mice from neurodegeneration<br>Heimann AS, Giardini AC, Sant'Anna MB, Dos Santos NB, Gewehr MCF, Munhoz CD, Castro LM, Picolo G, Remer RA, Ferro ES<br>Neurosci Lett. 2020<br>721:134765 doi: 10.1016/j.neulet.2020.134765 | Pubmed<br>Scopus<br>Web of Science | Discard<br>Reasons:<br>Not of interest  |
| 531. | Nonpsychotropic cannabinoid receptors regulate microglial cell migration.<br>Walter L, Franklin A, Witting A, Wade C, Xie YH, Kunos G, Mackie K, Stella N<br>JOURNAL OF NEUROSCIENCE 2003<br>23(4): 1398-1405 doi: 10.1523/JNEUROSCI.23-04-01398.2003                                              | Web of Science                     | Discard<br>Reasons:<br>Not of interest. |
| 532. | Nose-to-brain Delivery of Natural Compounds for the Treatment of Central Nervous System Disorders<br>Bicker J, Fortuna A, Alves G, Falcão,A                                                                                                                                                        | Scopus                             | Discard<br>Reasons:<br>Not of interest  |

|      |                                                                                                                                                                                                                                                                                                                                       |                                    |                                        |
|------|---------------------------------------------------------------------------------------------------------------------------------------------------------------------------------------------------------------------------------------------------------------------------------------------------------------------------------------|------------------------------------|----------------------------------------|
|      | Curr Pharm Des 2020<br>26(5):594-619. doi: 10.2174/1381612826666200115101544                                                                                                                                                                                                                                                          |                                    |                                        |
| 533. | Nothing Ventured, Nothing Gained: Regulations Cripple Potentially Life-Saving Research of Illicit Substances<br>Kodye L. Abbott, Kristina S. Gill, Patrick C. Flannery, Dawn M. Boothe, Muralikrishnan Dhanasekaran, and Satyanarayana R. Pondugula<br>ACS Chem. Neurosci. 2020<br>11, 10, 1382–1384 doi: 10.1021/acchemneuro.0c00241 | Scopus                             | Discard<br>Reasons:<br>Not of interest |
| 534. | Novel approaches and current challenges with targeting the endocannabinoid system<br>Morales P, Jagerovic N.<br>Expert Opin Drug Discov. 2020<br>15(8): 917-930 doi:10.1080/17460441.2020.1752178                                                                                                                                     | Pubmed<br>Scopus<br>Web of Science | Discard<br>Reasons:<br>Not of interest |
| 535. | Novel role for cannabidiol in circadian clock function<br>Bifulco M, Navarra G, Laezza C, Pagano C<br>Addict Biol 2020<br>25(2):e12772. doi: 10.1111/adb.12772                                                                                                                                                                        | Scopus                             | Discard<br>Reasons:<br>Not of interest |
| 536. | Novel targets in multiple sclerosis: To oxidative stress and beyond<br>Chiurchiù V<br>Current Topics in Medicinal Chemistry 2014<br>14(22):2590-2599 doi:10.2174/1568026614666141203143801                                                                                                                                            | Scopus                             | Discard<br>Reasons:<br>Not of interest |
| 537. | Off-label use of cannabinoids efficacy and safety<br>Julia SG, Marta VR, Lourdes GR, Isabel GM, Amparo FG, Dolores BH<br>European Journal of Clinical Pharmacy 2017<br>19(3):158-163                                                                                                                                                  | Scopus                             | Discard<br>Reasons:<br>Not of interest |
| 538. | On healthcare by popular appeal: critical assessment of benefit and risk in cannabidiol based dietary supplements.<br>Cogan PS<br>EXPERT REVIEW OF CLINICAL PHARMACOLOGY 2019<br>12(6): 501-511 DOI: 10.1080/17512433.2019.1612743                                                                                                    | Web of Science                     | Discard<br>Reasons:<br>Not of interest |
| 539. | On the pharmacological properties of $\Delta$ 9-tetrahydrocannabinol (THC)<br>Costa B<br>Chemistry and Biodiversity 2007<br>4(8):1664-1677 doi:10.1002/cbdv.200790146                                                                                                                                                                 | Scopus                             | Discard<br>Reasons:<br>Not of interest |
| 540. | Opioids and opioid receptors in multiple sclerosis<br>Mirshafiey A, Mohsenzadegan M<br>Journal of Chinese Clinical Medicine 2010<br>5(3):171-177                                                                                                                                                                                      | Scopus                             | Discard<br>Reasons:<br>Not of interest |

|      |                                                                                                                                                                                                                                                                                                                                                                              |                                    |                                        |
|------|------------------------------------------------------------------------------------------------------------------------------------------------------------------------------------------------------------------------------------------------------------------------------------------------------------------------------------------------------------------------------|------------------------------------|----------------------------------------|
| 541. | Opportunities in systems biology to discover mechanisms and repurpose drugs for CNS diseases<br>Mei H, Xia T, Feng G, Zhu J, Lin SM, Qiu Y<br>Drug Discovery Today 2012<br>17(21-22):1208-1216 doi:10.1016/j.drudis.2012.06.015                                                                                                                                              | Scopus                             | Discard<br>Reasons:<br>Not of interest |
| 542. | Oral administration of cannabis with lipids leads to high levels of cannabinoids in the intestinal lymphatic system and prominent immunomodulation<br>Zgair A, Lee JB, Wong JCM, Taha DA, Aram J, Di Virgilio D, McArthur JW, Cheng YK, Hennig IM, Barrett DA, Fischer PM, Constantinescu CS, Gershkovich P.<br>Sci Rep. 2017<br>7(1):14542. doi: 10.1038/s41598-017-15026-z | Pubmed<br>Scopus<br>Web of Science | Keep                                   |
| 543. | Oral cannabinoids for spasticity in multiple sclerosis: will attitude continue to limit use?<br>Metz L, Page S.<br>Lancet. 2003<br>362(9395):1513. No abstract available.                                                                                                                                                                                                    | Pubmed                             | Discard<br>Reasons:<br>Not of interest |
| 544. | Oromucosal Delta (9)-tetrahydrocannabinol/cannabidiol for neuropathic pain associated with multiple sclerosis: An uncontrolled, open-label, 2-year extension trial.<br>Rog DJ, Nurmikko TJ, Young CA<br>CLINICAL THERAPEUTICS 2007<br>29(9): 2068-2079 doi: 10.1016/j.clinthera.2007.09.013                                                                                  | Pubmed<br>Scopus<br>Web of Science | Discard<br>Reasons:<br>Not of interest |
| 545. | Overview of cannabidiol (CBD) and its analogues: Structures, biological activities, and neuroprotective mechanisms in epilepsy and Alzheimer's disease.<br>Li H, Liu Y, Tian D, Tian L, Ju X, Qi L, Wang Y, Liang C<br>European Journal of Medicinal Chemistry 2020<br>192:112163 doi: 10.1016/j.ejmech.2020.112163                                                          | Web of Science                     | Discard<br>Reasons:<br>Not of interest |
| 546. | Overview of MS spasticity<br>Pozzilli C<br>European Neurology 2014<br>71SUPPL.1:1-3 doi:10.1159/000357739                                                                                                                                                                                                                                                                    | Pubmed<br>Scopus                   | Discard<br>Reasons:<br>Not of interest |
| 547. | Pain and multiple sclerosis: Pathophysiology and treatment topical collection on demyelinating disorders<br>Solaro C, Trabucco E, Messmer Uccelli M<br>Current Neurology and Neuroscience Reports 2013<br>13(1):320 doi:10.1007/s11910-012-0320                                                                                                                              | Scopus                             | Discard<br>Reasons:<br>Not of interest |
| 548. | Pain associated with multiple sclerosis: Systematic review and proposed classification<br>O'Connor AB, Schwid SR, Herrmann DN, Markman JD, Dworkin RH<br>Pain 2008                                                                                                                                                                                                           | Scopus                             | Discard<br>Reasons:<br>Not of interest |

|      |                                                                                                                                                                                                                                                                                                                                                             |                                    |                                        |
|------|-------------------------------------------------------------------------------------------------------------------------------------------------------------------------------------------------------------------------------------------------------------------------------------------------------------------------------------------------------------|------------------------------------|----------------------------------------|
|      | 137(1):96-111 doi:10.1016/j.pain.2007.08.024                                                                                                                                                                                                                                                                                                                |                                    |                                        |
| 549. | Pain in multiple sclerosis: Prevalence, mechanisms, types and treatment [El dolor en la esclerosis múltiple: Prevalencia, mecanismos, tipos y tratamiento]<br>Bermejo PE, Oreja-Guevara C, Díez-Tejedor E<br>Revista de Neurologia 2010<br>50(2):101-108                                                                                                    | Scopus                             | Discard<br>Reasons:<br>Not of interest |
| 550. | Pain Modulation after Oromucosal Cannabinoid Spray (SATIVEX(®)) in Patients with Multiple Sclerosis: A Study with Quantitative Sensory Testing and Laser-Evoked Potentials<br>Turri M, Teatini F, Donato F, Zanette G, Tugnoli V, Deotto L, Bonetti B, Squintani G.<br>Medicines (Basel). 2018<br>5(3). pii: E59. doi: 10.3390/medicines5030059             | Pubmed                             | Discard<br>Reasons:<br>Not of interest |
| 551. | Pain relief with cannabinoids-- the importance of endocannabinoids and cannabinoids for pain therapy<br>Karst M, Bernateck M.<br>Anesthesiol Intensivmed Notfallmed Schmerzther. 2008<br>43(7-8):522-8. doi: 10.1055/s-0028-1083094                                                                                                                         | Pubmed<br>Scopus                   | Discard<br>Reasons:<br>Not of interest |
| 552. | Pain Therapeutics - SMi Conference 11-12 June 2003, London, UK<br>De La Rue SA<br>IDrugs 2003<br>6(7):652-655                                                                                                                                                                                                                                               | Scopus                             | Discard<br>Reasons:<br>Not of interest |
| 553. | Pain therapy in multiple sclerosis [Schmerzbehandlung bei multipler sklerose]<br>Van Schayck RH<br>Neurologie und Rehabilitation 2006<br>12(4):180-194                                                                                                                                                                                                      | Scopus                             | Discard<br>Reasons:<br>Not of interest |
| 554. | Palatability and oral cavity tolerability of THC: CBD oromucosal spray and possible improvement measures in multiple sclerosis patients with resistant spasticity: a pilot study.<br>Lus G, Cantello R, Danni MC, Rini A, Sarchielli P, Tassinari T, Signoriello E<br>Neurodegenerative Disease Management 2018<br>8(2): 105-113 doi: 10.2217/nmt-2017-0056 | Pubmed<br>Scopus<br>Web of Science | Discard<br>Reasons:<br>Not of interest |
| 555. | Pathophysiology, assessment and management of multiple sclerosis spasticity: an update<br>Haas J.<br>Expert Rev Neurother. 2011<br>11(4 Suppl):3-8. Review                                                                                                                                                                                                  | Pubmed<br>Scopus                   | Discard<br>Reasons:<br>Not of interest |
| 556. | Pathways and gene networks mediating the regulatory effects of cannabidiol, a nonpsychoactive cannabinoid, in autoimmune T cells<br>Kozela E, Juknat A, Gao F, Kaushansky N, Coppola G, Vogel Z.                                                                                                                                                            | Pubmed<br>Scopus<br>Web of Science | Keep                                   |

|      |                                                                                                                                                                                                                                                                                                        |                                    |                                        |
|------|--------------------------------------------------------------------------------------------------------------------------------------------------------------------------------------------------------------------------------------------------------------------------------------------------------|------------------------------------|----------------------------------------|
|      | J Neuroinflammation. 2016<br>13(1):136. doi: 10.1186/s12974-016-0603-x                                                                                                                                                                                                                                 |                                    |                                        |
| 557. | Patient Counseling Guidelines for the Use of Cannabis for the Treatment of Chemotherapy-Induced Nausea/Vomiting and Chronic Pain<br>Makary P, Parmar JR, Mims N, Khanfar NM, Freeman RA<br>Journal of Pain and Palliative Care Pharmacotherapy 2018<br>32(4):216-225 doi:10.1080/15360288.2019.1598531 | Scopus                             | Discard<br>Reasons:<br>Not of interest |
| 558. | Patterns of medicinal cannabis use, strain analysis, and substitution effect among patients with migraine, headache, arthritis, and chronic pain in a medicinal cannabis cohort<br>Baron EP, Lucas P, Eades J, Hogue O<br>Journal of Headache and Pain 2018,<br>19(1):37 doi:10.1186/s10194-018-0862-2 | Scopus<br>Web of Science           | Discard<br>Reasons:<br>Not of interest |
| 559. | Perspectives on Cannabis-Based Therapy of Multiple Sclerosis: A Mini-Review<br>Mecha M, Carrillo-Salinas FJ, Feliú A, Mestre L, Guaza C<br>Front. Cell. Neurosci. 2020<br>doi:10.3389/fncel.2020.00034                                                                                                 | Scopus                             | Discard<br>Reasons:<br>Not of interest |
| 560. | Pharmacist's Guide to CBD Oil<br>Treese NM<br>US Pharm. 2020<br>45(3):20-23                                                                                                                                                                                                                            | Web of Science                     | Discard<br>Reasons:<br>Not of interest |
| 561. | Pharmacokinetic evaluation of nabiximols for the treatment of multiple sclerosis pain<br>Tanasescu R, Constantinescu CS.<br>Expert Opin Drug Metab Toxicol. 2013<br>9(9):1219-28. doi: 10.1517/17425255.2013.795542.                                                                                   | Pubmed<br>Scopus<br>Web of Science | Discard<br>Reasons:<br>Not of interest |
| 562. | Pharmacokinetics and pharmacodynamics of cannabinoids.<br>Grotenhermen F<br>Clinical Pharmacokinetics 2003<br>42(4): 327-360 DOI: 10.2165/00003088-200342040-00003                                                                                                                                     | Web of Science                     | Discard<br>Reasons:<br>Not of interest |
| 563. | Pharmacokinetics of Sativex® in Dogs: Towards a Potential Cannabinoid-Based Therapy for Canine Disorders<br>Fernández-Trapero M, Pérez-Díaz C, Espejo-Porras F, de Lago E, Fernández-Ruiz J.<br>Biomolecules. 2020<br>10(2):279. doi: 10.3390/biom10020279                                             | Pubmed<br>Scopus<br>Web of Science | Discard<br>Reasons:<br>Not of interest |
| 564. | Pharmacologic Treatment Tools: Systemic Medications and Toxins, Opportunities, and Pitfalls<br>Riedel P, Marino MH<br>Physical Medicine and Rehabilitation Clinics of North America 2018                                                                                                               | Scopus                             | Discard<br>Reasons:<br>Not of interest |

|      |                                                                                                                                                                                                                                                                                                           |                                    |                                        |
|------|-----------------------------------------------------------------------------------------------------------------------------------------------------------------------------------------------------------------------------------------------------------------------------------------------------------|------------------------------------|----------------------------------------|
|      | 29(3):501-517 doi:10.1016/j.pmr.2018.04.008                                                                                                                                                                                                                                                               |                                    |                                        |
| 565. | Pharmacological and therapeutic targets for Delta(9)-tetrahydrocannabinol and cannabidiol.<br>Pertwee RG<br>EUPHYTICA 2004<br>140(1-2): 73-82 doi: 10.1007/s10681-004-4756-9                                                                                                                              | Web of Science                     | Discard<br>Reasons:<br>Not of interest |
| 566. | Pharmacological management of pain in patients with multiple sclerosis<br>Solaro C, Messmer Uccelli M<br>Drugs 2010<br>70(10):1245-1254 doi:10.2165/11537930-000000000-00000                                                                                                                              | Scopus                             | Discard<br>Reasons:<br>Not of interest |
| 567. | Pharmacological management of spasticity in multiple sclerosis: Systematic review and consensus paper<br>Otero-Romero S, Sastre-Garriga J, Comi G, Hartung HP, Soelberg SÃ,rensen P, Thompson AJ, Vermersch P, Gold R, Montalban X.<br>Mult Scler. 2016<br>22(11):1386-1396 doi: 10.1177/1352458516643600 | Pubmed<br>Scopus<br>Web of Science | Discard<br>Reasons:<br>Not of interest |
| 568. | Pharmacological properties and therapeutic possibilities for drugs acting upon endocannabinoid receptors<br>Fowler CJ<br>Current Drug Targets: CNS and Neurological Disorders 2005<br>4(6):685-696 doi:10.2174/156800705774933041                                                                         | Scopus                             | Discard<br>Reasons:<br>Not of interest |
| 569. | Pharmacology and potential therapeutic uses of cannabis<br>Hirst RA, Lambert DG, Nottcutt WG<br>British Journal of Anaesthesia 1998<br>81(1):77-84 doi:10.1093/bja/81.1.77                                                                                                                                | Scopus                             | Discard<br>Reasons:<br>Not of interest |
| 570. | Pharmacology and toxicology of cannabis derivatives and endocannabinoid agonists<br>Gerra G, Zaimovic A, Gerra ML, Ciccocioppo R, Cippitelli A, Serpelloni G, Somaini L<br>Recent Patents on CNS Drug Discovery 2010<br>5(1):46-52 doi:10.2174/157488910789753521                                         | Scopus                             | Discard<br>Reasons:<br>Not of interest |
| 571. | Pharmacology of Medical Cannabis<br>Md Ruhul AminDeclan W. Ali<br>Recent Advances in Cannabinoid Physiology and Pathology 2019<br>151-165                                                                                                                                                                 | Web of Science                     | Discard<br>Reasons:<br>Not of interest |
| 572. | Pharmacotherapeutic options for the treatment of Multiple sclerosis<br>Palmer AM<br>Clinical Medicine Insights: Therapeutics 2012<br>4(145):168 doi:10.4137/CMT.S8661                                                                                                                                     | Scopus                             | Discard<br>Reasons:<br>Not of interest |



|      |                                                                                                                                                                                                                                                                                                   |                                    |                                        |
|------|---------------------------------------------------------------------------------------------------------------------------------------------------------------------------------------------------------------------------------------------------------------------------------------------------|------------------------------------|----------------------------------------|
| 573. | Pharmacotherapeutic considerations for use of cannabinoids to relieve pain in patients with malignant diseases.<br>Darkovska-Serafimovska M, Serafimovska T, Arsova-Sarafinovska Z, Stefanoski S, Keskovski Z, Balkanov T<br>Journal of Pain Research 2018<br>11:837-842 doi: 10.2147/JPR.S160556 | Web of Science                     | Discard<br>Reasons:<br>Not of interest |
| 574. | Phytocannabinoids and cannabimimetic drugs: Recent patents in central nervous system disorders<br>Ranieri R, Marasco D, Bifulco M, Malfitano AM<br>Recent Patents on CNS Drug Discovery 2016<br>10(2):157-177 doi:10.2174/1574889810666160517123938                                               | Scopus                             | Discard<br>Reasons:<br>Not of interest |
| 575. | Phytocannabinoids as novel therapeutic agents in CNS disorders.<br>Hill AJ, Williams CM, Whalley BJ, Stephens GJ<br>PHARMACOLOGY & THERAPEUTICS 2012<br>133(1): 79-97 doi: 10.1016/j.pharmthera.2011.09.002                                                                                       | Web of Science                     | Discard<br>Reasons:<br>Not of interest |
| 576. | Phytochemistry of Cannabis sativa L<br>ElSohly MA, Radwan, MM, Gul W, Chandra S, Galal A<br>Progress in the chemistry of organic natural products 2017<br>103(1):36-55 doi:10.1007/978-3-319-45541-9 1                                                                                            | Pubmed<br>Scopus                   | Discard<br>Reasons:<br>Not of interest |
| 577. | Phytotherapy as a complementary medicine for multiple sclerosis [Multipl sklerozda tamamlayıcı tedavi olarak fitoterapi]<br>Rabiei Z<br>Turkish Journal of Pharmaceutical Sciences 2019<br>16(2):246-251 doi:10.4274/tjps.galenos.2018.90522                                                      | Scopus                             | Discard<br>Reasons:<br>Not of interest |
| 578. | Place of cannabinoids in medicine [Stellenwert der Cannabinoide in der Medizin]<br>Müller-Vahl K, Grotenhermen F<br>Padiatrische Praxis 2017<br>88(1):147-155                                                                                                                                     | Scopus                             | Discard<br>Reasons:<br>Not of interest |
| 579. | Placebo effects in a multiple sclerosis spasticity enriched clinical trial with the oromucosal cannabinoid spray (THC/CBD): dimension and possible causes<br>Di Marzo V, Centonze D.<br>CNS Neurosci Ther. 2015<br>21(3):215-21. doi: 10.1111/cns.12358.                                          | Pubmed<br>Scopus<br>Web of Science | Discard<br>Reasons:<br>Not of interest |
| 580. | Plant, synthetic, and endogenous cannabinoids in medicine<br>Di Marzo V, De Petrocellis L<br>Annual Review of Medicine 2006<br>57:553-574 doi:10.1146/annurev.med.57.011205.135648                                                                                                                | Scopus                             | Discard<br>Reasons:<br>Not of interest |

|      |                                                                                                                                                                                                                                                                                                                                                                                    |                  |                                        |
|------|------------------------------------------------------------------------------------------------------------------------------------------------------------------------------------------------------------------------------------------------------------------------------------------------------------------------------------------------------------------------------------|------------------|----------------------------------------|
| 581. | Plasma Cannabinoid Pharmacokinetics following Controlled Oral Delta(9)-Tetrahydrocannabinol and Oromucosal Cannabis Extract Administration.<br>Karschner EL, Darwin WD, Goodwin RS, Wright S, Huestis MA<br>CLINICAL CHEMISTRY 2011<br>57(1): 66-75 doi: 10.1373/clinchem.2010.152439                                                                                              | Web of Science   | Discard<br>Reasons:<br>Not of interest |
| 582. | Plastic and neuroprotective mechanisms involved in the therapeutic effects of cannabidiol in psychiatric disorders<br>Campos AC, Fogaça MV, Scarante FF, Joca SRL, Sales AJ, Gomes FV, Sonogo AB, Rodrigues NS, Galve-Roperh I, Guimarães FS<br>Frontiers in Pharmacology 2017<br>269 doi:10.3389/fphar.2017.00269                                                                 | Scopus           | Discard<br>Reasons:<br>Not of interest |
| 583. | Poly-epsilon-caprolactone microspheres as a drug delivery system for cannabinoid administration: Development, characterization and in vitro evaluation of their antitumoral efficacy.<br>de la Ossa DHP, Ligresti A, Gil-Alegre ME, Aberturas MR, Molpeceres J, Di Marzo V, Suarez AIT<br>JOURNAL OF CONTROLLED RELEASE 2012<br>161(3): 927-932 doi: 10.1016/j.jconrel.2012.05.003 | Web of Science   | Discard<br>Reasons:<br>Not of interest |
| 584. | Polypharmacology Shakes Hands with Complex Aetiopathology.<br>Brodie JS, Di Marzo V, Guy GW<br>TRENDS IN PHARMACOLOGICAL SCIENCES 2015<br>36(12): 802-821 doi: 10.1016/j.tips.2015.08.010                                                                                                                                                                                          | Web of Science   | Discard<br>Reasons:<br>Not of interest |
| 585. | Pot and pain<br>Miller G<br>Science 2016<br>354(6312):566-568 doi:10.1126/science.354.6312.566                                                                                                                                                                                                                                                                                     | Scopus           | Discard<br>Reasons:<br>Not of interest |
| 586. | Potential control of multiple sclerosis by cannabis and the endocannabinoid system<br>Pryce G, Baker D<br>CNS and Neurological Disorders - Drug Targets 2012<br>11(5):624-641 doi:10.2174/187152712801661310                                                                                                                                                                       | Scopus           | Discard<br>Reasons:<br>Not of interest |
| 587. | Preclinical and clinical assessment of cannabinoids as anti-cancer agents<br>Ladin DA, Soliman E, Griffin L, Van Dross R<br>Frontiers in Pharmacology 2016<br>7:361 doi:10.3389/fphar.2016.00361                                                                                                                                                                                   | Scopus           | Discard<br>Reasons:<br>Not of interest |
| 588. | Predictors of Nabiximols (Sativex®) discontinuation over long-term follow-up: a real-life study                                                                                                                                                                                                                                                                                    | Pubmed<br>Scopus | Discard<br>Reasons:<br>Not of interest |

|      |                                                                                                                                                                                                                                                                                                                                                             |                |                                        |
|------|-------------------------------------------------------------------------------------------------------------------------------------------------------------------------------------------------------------------------------------------------------------------------------------------------------------------------------------------------------------|----------------|----------------------------------------|
|      | Carotenuto A, Costabile T, De Lucia M, Moccia M, Falco F, Petruzzo M, De Angelis M, Russo CV, Saccà F, Lanzillo R, Brescia Morra V.<br>J Neurol. 2020<br>267(6):1737-1743. doi: 10.1007/s00415-020-09739-x.                                                                                                                                                 |                |                                        |
| 589. | Preparation and characterization of Delta (9)-tetrahydrocannabinol-loaded biodegradable polymeric microparticles and their antitumoral efficacy on cancer cell lines.<br>de la Ossa DHP, Gil-Alegre ME, Ligresti A, Aberturas MD, Molpeceres J, Torres AI, Di Marzo V<br>JOURNAL OF DRUG TARGETING 2013<br>21(8): 710-718 doi: 10.3109/1061186X.2013.809089 | Web of Science | Discard<br>Reasons:<br>Not of interest |
| 590. | Prescribing cannabinoids for multiple sclerosis - Current issues.<br>Pertwee RG<br>CNS DRUGS 1999<br>11(5): 327-334 doi: 10.2165/00023210-199911050-00001                                                                                                                                                                                                   | Web of Science | Discard<br>Reasons:<br>Not of interest |
| 591. | Presymptomatic diagnosis with MRI and adequate treatment ameliorate the outcome after natalizumab-associated progressive multifocal leukoencephalopathy<br>Lindå H, von Heijne A<br>Frontiers in Neurology 2013<br>11:31 doi:10.3389/fneur.2013.00011                                                                                                       | Scopus         | Discard<br>Reasons:<br>Not of interest |
| 592. | Product update<br>Rempel P<br>Canadian Pharmacists Journal 2010<br>143(6):268-270 doi:10.3821/1913-701X-143.6.268                                                                                                                                                                                                                                           | Scopus         | Discard<br>Reasons:<br>Not of interest |
| 593. | Progress in cannabis research from a pharmaceutical chemist's point of view.<br>Muller CE<br>BUNDESGESUNDHEITSBLATT-GESUNDHEITSFORSCHUNG-GESUNDHEITSSCHUTZ 2019<br>62(7): 818-824 doi: 10.1007/s00103-019-02964-4                                                                                                                                           | Web of Science | Discard<br>Reasons:<br>Not of interest |
| 594. | Progress in study of new drugs for treatment of multiple sclerosis<br>Chen Z-Z<br>Pharmaceutical Biotechnology 2009<br>16(2):186-188                                                                                                                                                                                                                        | Scopus         | Discard<br>Reasons:<br>Not of interest |
| 595. | Pros and cons of medical cannabis use by people with chronic brain disorders<br>Suryadevara U, Bruijnzeel DM, Nuthi M, Jagnarine DA, Tandon R, Bruijnzeel AW<br>Current Neuropharmacology 2017<br>15(6):800-814 doi:10.2174/1570159X14666161101095325                                                                                                       | Scopus         | Discard<br>Reasons:<br>Not of interest |

|      |                                                                                                                                                                                                                                                                                                                                                                                           |                                    |                                        |
|------|-------------------------------------------------------------------------------------------------------------------------------------------------------------------------------------------------------------------------------------------------------------------------------------------------------------------------------------------------------------------------------------------|------------------------------------|----------------------------------------|
| 596. | Protective Effects of Cannabidiol against Seizures and Neuronal Death in a Rat Model of Mesial Temporal Lobe Epilepsy.<br>Do Val-da Silva RA, Peixoto-Santos JE, Kandratavicius L, De Ross JB, Esteves I, De Martinis BS, Alves MNR, Scandiuizzi RC, Hallak JEC, Zuardi, AW, Crippa JA, Leite JP<br>Frontiers in Pharmacology 2017<br>8 Article Number: 131 doi: 10.3389/fphar.2017.00131 | Web of Science                     | Discard<br>Reasons:<br>Not of interest |
| 597. | Protective effects of cannabidiol on cuprizone-induced demyelination in C57BL/6 mice.<br>Sajjadian M, Kashani IR, Pasbakhsh P, Hassani M, Omid A, Takzare N, Clarner T, Beyer C, Zendedel A<br>Journal of Contemporary Medical Sciences 2017<br>3(11): 278-283 doi: 10.22317/jcms.09201707                                                                                                | Web of Science                     | Keep                                   |
| 598. | Protective Effects of Cannabidiol on Lesion-Induced Intervertebral Disc Degeneration.<br>Silveira JW, Issy AC, Castania VA, Salmon CEG, Nogueira-Barbosa MH Guimaraes, FS, Defino HLA, Del Bel E<br>PLOS ONE 2014<br>9(12) Article Number: e113161 doi: 10.1371/journal.pone.0113161                                                                                                      | Web of Science                     | Discard<br>Reasons:<br>Not of interest |
| 599. | Psychopathological and cognitive effects of therapeutic cannabinoids in multiple sclerosis: a double-blind, placebo controlled, crossover study<br>Aragona M, Onesti E, Tomassini V, Conte A, Gupta S, Gilio F, Pantano P, Pozzilli C, Inghilleri M.<br>Clin Neuropharmacol. 2009<br>32(1):41-7. doi: 10.1097/WNF.0B013E3181633497                                                        | Pubmed<br>Scopus                   | Discard<br>Reasons:<br>Not of interest |
| 600. | PTL401, a New Formulation Based on Pro-Nano Dispersion Technology, Improves Oral Cannabinoids Bioavailability in Healthy Volunteers. Atsmon J, Cherniakov I, Izgelov D, Hoffman A, Domb AJ, Deutsch L, Deutsch F, Heffetz D, Sacks H<br>Journal of Pharmaceutical Sciences 2018<br>107(5): 1423-1429 doi: 10.1016/j.xphs.2017.12.020                                                      | Web of Science                     | Discard<br>Reasons:<br>Not of interest |
| 601. | Purified Cannabidiol, the main non-psychotropic component of Cannabis sativa, alone, counteracts neuronal apoptosis in experimental multiple sclerosis<br>Giacoppo S, Soundara Rajan T, Galuppo M, Pollastro F, Grassi G, Bramanti P, Mazzon E.<br>Eur Rev Med Pharmacol Sci. 2015<br>19(24):4906-19                                                                                      | Pubmed<br>Scopus<br>Web of Science | Discard<br>Reasons:<br>Not of interest |
| 602. | Randomized controlled trial of cannabis-based medicine in spasticity caused by multiple sclerosis<br>Collin C, Davies P, Mutiboko IK, Ratcliffe S<br>Eur J Neurol. 2007                                                                                                                                                                                                                   | Pubmed<br>Scopus<br>Web of Science | Discard<br>Reasons:<br>Not of interest |

|      |                                                                                                                                                                                                                                                                                                                 |                                    |                                        |
|------|-----------------------------------------------------------------------------------------------------------------------------------------------------------------------------------------------------------------------------------------------------------------------------------------------------------------|------------------------------------|----------------------------------------|
|      | 14(3):290-6 doi: 10.1111/j.1468-1331.2006.01639.x                                                                                                                                                                                                                                                               |                                    |                                        |
| 603. | Randomized controlled trial of Sativex to treat detrusor overactivity in multiple sclerosis<br>Kavia RB, De Ridder D, Constantinescu CS, Stott CG, Fowler CJ.<br>Mult Scler. 2010<br>16(11):1349-59. doi: 10.1177/1352458510378020.                                                                             | Pubmed<br>Scopus<br>Web of Science | Discard<br>Reasons:<br>Not of interest |
| 604. | Randomized, controlled trial of cannabis-based medicine in central pain in multiple sclerosis<br>Rog DJ, Nurmikko TJ, Friede T, Young CA.<br>Neurology. 2005<br>65(6):812-9 doi: 10.1212/01.wnl.0000176753.45410.8b                                                                                             | Pubmed<br>Scopus<br>Web of Science | Discard<br>Reasons:<br>Not of interest |
| 605. | Real world experience of patients with amyotrophic lateral sclerosis (ALS) in the treatment of spasticity using tetrahydrocannabinol:cannabidiol (THC:CBD)<br>Meyer T, Funke A, MÃ¼nch C, Kettemann D, Maier A, Walter B, Thomas A, Spittel S.<br>BMC Neurol. 2019<br>19(1):222. doi: 10.1186/s12883-019-1443-y | Pubmed<br>Scopus<br>Web of Science | Discard<br>Reasons:<br>Not of interest |
| 606. | Reassessment of the role of cannabinoids in the management of pain<br>Beaulieu P, Ware M<br>Current Opinion in Anaesthesiology 2007<br>20(5):473-477 doi:10.1097/ACO.0b013e3282efd175                                                                                                                           | Scopus                             | Discard<br>Reasons:<br>Not of interest |
| 607. | Refractory trigeminal neuralgia responsive to nabiximols in a patient with multiple sclerosis<br>Gajofatto A.<br>Mult Scler Relat Disord. 2016<br>8:64-5. doi: 10.1016/j.msard.2016.05.004.                                                                                                                     | Pubmed<br>Scopus<br>Web of Science | Discard<br>Reasons:<br>Not of interest |
| 608. | Report of objective clinical responses of cancer patients to pharmaceutical-grade synthetic cannabidiol<br>Kenyon J, Liu W, Dalglish A<br>Anticancer Research 2018<br>38(10):5831-5835 doi:10.21873/anticanres.12924                                                                                            | Scopus                             | Discard<br>Reasons:<br>Not of interest |
| 609. | Research into cannabinoid medicines may suggest potential therapeutic opportunities<br>Knott C<br>Pharmacy in Practice 2008<br>18(3):96-109                                                                                                                                                                     | Scopus                             | Discard<br>Reasons:<br>Not of interest |
| 610. | Restatement. Therapeutic use of cannabis derivatives [Mise au point. Usage therapeutique des dÃ©rivÃ©s du cannabis]<br>Benyamina A, Reynaud M<br>Revue du Praticien 2014                                                                                                                                        | Scopus                             | Discard<br>Reasons:<br>Not of interest |

|      |                                                                                                                                                                                                                                                                                  |                                    |                                        |
|------|----------------------------------------------------------------------------------------------------------------------------------------------------------------------------------------------------------------------------------------------------------------------------------|------------------------------------|----------------------------------------|
|      | 64(2):165-168                                                                                                                                                                                                                                                                    |                                    |                                        |
| 611. | Resveratrol: More than a phytochemical<br>Hassanzadeh P, Atyabi F, Dinarvand R<br>Biomedical Reviews 2015<br>26(13):21 doi:10.14748/bmr.v26.1540                                                                                                                                 | Scopus                             | Discard<br>Reasons:<br>Not of interest |
| 612. | Review of the neurological benefits of phytocannabinoids<br>Maroon J, Bost J.<br>Surg Neurol Int. 2018<br>9:91. doi: 10.4103/sni.sni 45 18.                                                                                                                                      | Pubmed                             | Discard<br>Reasons:<br>Not of interest |
| 613. | Review:Weak evidence of benefits of cannabis for chronic neuropathic pain; Moderate to weak evidence of adverse effects<br>Murff HJ<br>Annals of Internal Medicine 2017<br>167(12): JC62 doi:10.7326/ACPJC-2017-167-12-062                                                       | Scopus                             | Discard<br>Reasons:<br>Not of interest |
| 614. | Role of adenosine in diabetic retinopathy<br>Liou GI, Ahmad S, Naime M, Fatteh N, Ibrahim AS<br>Journal of Ocular Biology, Diseases, and Informatics 2011<br>4(1-2):19-24 doi:10.1007/s12177-011-9067-5                                                                          | Scopus                             | Discard<br>Reasons:<br>Not of interest |
| 615. | Role of cannabinoids in multiple sclerosis<br>Zajicek JP, Apostu VI<br>CNS Drugs 2011<br>25(3):187-201 doi:10.2165/11539000-000000000-00000                                                                                                                                      | Scopus                             | Discard<br>Reasons:<br>Not of interest |
| 616. | Role of cannabinoids in the management of neuropathic pain<br>Martín Fontelles MI, Goicoechea García C<br>CNS Drugs 2008<br>22(8):645-653 doi:10.2165/00023210-200822080-00003                                                                                                   | Scopus                             | Discard<br>Reasons:<br>Not of interest |
| 617. | Role of Myeloid-Derived Suppressor Cells in Amelioration of Experimental Autoimmune Hepatitis Following Activation of TRPV1 Receptors by Cannabidiol.<br>Hegde VL, Nagarkatti PS, Nagarkatti M<br>PLOS ONE 2011<br>6(4) Article Number: e18281 doi: 10.1371/journal.pone.0018281 | Web of Science                     | Discard<br>Reasons:<br>Not of interest |
| 618. | Role of the cannabinoid system in pain control and therapeutic implications for the management of acute and chronic pain episodes<br>Manzanares J, Julian M, Carrascosa A.<br>Curr Neuropharmacol. 2006<br>4(3):239-57. doi: 10.2174/157015906778019527                          | Pubmed<br>Scopus<br>Web of Science | Discard<br>Reasons:<br>Not of interest |

|      |                                                                                                                                                                                                                                                                                                                                                                             |                                    |                                        |
|------|-----------------------------------------------------------------------------------------------------------------------------------------------------------------------------------------------------------------------------------------------------------------------------------------------------------------------------------------------------------------------------|------------------------------------|----------------------------------------|
| 619. | Safety and efficacy of nabiximols on spasticity symptoms in patients with motor neuron disease (CANALS): a multicentre, double-blind, randomised, placebo-controlled, phase 2 trial<br>Riva N, Mora G, SorarÃ¹ G, Lunetta C, Ferraro OE, Falzone Y, Leocani L, Fazio R, Comola M, Comi G<br>Lancet Neurol. 2019<br>18(2):155-164. doi: 10.1016/S1474-4422(18)30406-X.       | Pubmed<br>Scopus<br>Web of Science | Discard<br>Reasons:<br>Not of interest |
| 620. | Safety and Toxicology of Cannabinoids.<br>Sachs J, McGlade E, Yurgelun Todd D<br>NEUROTHERAPEUTICS 2015<br>12(4): 735-746 doi: 10.1007/s13311-015-0380-8                                                                                                                                                                                                                    | Web of Science                     | Discard<br>Reasons:<br>Not of interest |
| 621. | Safety, efficacy, and mechanisms of action of cannabinoids in neurological disorders<br>Friedman D, French JA, Maccarrone M.<br>Lancet Neurol. 2019<br>18(5):504-512. doi: 10.1016/S1474-4422(19)30032-8                                                                                                                                                                    | Pubmed<br>Scopus<br>Web of Science | Discard<br>Reasons:<br>Not of interest |
| 622. | Safety, tolerability, and efficacy of orally administered cannabinoids in MS<br>Russo EB.<br>Neurology. 2003<br>60(4):729-30 author reply 729-30. No abstract available.                                                                                                                                                                                                    | Pubmed                             | Discard<br>Reasons:<br>Not of interest |
| 623. | Sativex (R) in multiple sclerosis spasticity: a cost-effectiveness model.<br>Slof J, Gras A<br>Expert Review of Pharmacoeconomics & Outcomes Research 2012<br>12(4): 525-538 doi: 10.1586/ERP.12.40                                                                                                                                                                         | Pubmed<br>Scopus<br>Web of Science | Discard<br>Reasons:<br>Not of interest |
| 624. | Sativex (R): clinical efficacy and tolerability in the treatment of symptoms of multiple sclerosis and neuropathic pain.<br>Barnes MP<br>Expert Opinion on Pharmacotherapy 2006<br>7(5): 607-615 doi: 10.1517/14656566.7.5.607                                                                                                                                              | Scopus<br>Web of Science           | Discard<br>Reasons:<br>Not of interest |
| 625. | Sativex ® as add-on therapy vs. further optimized first-line ANTispastics (SAVANT) in resistant multiple sclerosis spasticity: a double-blind, placebo-controlled randomised clinical trial<br>MarkovÃ¡ J, Essner U, Akmaz B, Marinelli M, Trompke C, Lentschat A, Vila C<br>International Journal of Neuroscience 2019<br>129(2):119-128 doi:10.1080/00207454.2018.1481066 | Pubmed<br>Scopus<br>Web of Science | Discard<br>Reasons:<br>Not of interest |
| 626. | Sativex for the management of multiple sclerosis symptoms<br>Perras C.<br>Issues Emerg Health Technol. 2005                                                                                                                                                                                                                                                                 | Pubmed<br>Scopus                   | Discard<br>Reasons:<br>Not of interest |

|      |                                                                                                                                                                                                                                                                                                                                                                                                                                                                                                |                                    |                                        |
|------|------------------------------------------------------------------------------------------------------------------------------------------------------------------------------------------------------------------------------------------------------------------------------------------------------------------------------------------------------------------------------------------------------------------------------------------------------------------------------------------------|------------------------------------|----------------------------------------|
|      | (72):1-4                                                                                                                                                                                                                                                                                                                                                                                                                                                                                       |                                    |                                        |
| 627. | Sativex in resistant multiple sclerosis spasticity: Discontinuation study in a large population of Italian patients (SA.FE. study)<br>Messina S, Solaro C, Righini I, Bergamaschi R, Bonavita S, Bossio RB, Brescia Morra V, Costantino G, Cavalla P, Centonze D, Comi G, Cottone S, Danni MC, Francia A, Gajofatto A, Gasperini C, Zaffaroni M, Petrucci L, Signoriello E, Maniscalco GT, Spinicci G, Matta M, et al.<br>PLoS One. 2017<br>12(8):e0180651. doi: 10.1371/journal.pone.0180651. | Pubmed<br>Scopus                   | Discard<br>Reasons:<br>Not of interest |
| 628. | Sativex in the management of multiple sclerosis-related spasticity: An overview of the last decade of clinical evaluation<br>Giacoppo S, Bramanti P, Mazzon E.<br>Mult Scler Relat Disord. 2017<br>17:22-31. doi: 10.1016/j.msard.2017.06.015.                                                                                                                                                                                                                                                 | Pubmed<br>Scopus<br>Web of Science | Discard<br>Reasons:<br>Not of interest |
| 629. | Sativex in the management of multiple sclerosis-related spasticity: role of the corticospinal modulation<br>Russo M, CalabrÃ² RS, Naro A, Sessa E, Rifici C, D'Aleo G, Leo A, De Luca R, Quartarone A, Bramanti P.<br>Neural Plast. 2015<br>2015:656582. doi: 10.1155/2015/656582.                                                                                                                                                                                                             | Pubmed<br>Scopus                   | Discard<br>Reasons:<br>Not of interest |
| 630. | Sativex long-term use: an open-label trial in patients with spasticity due to multiple sclerosis<br>Serpell MG, Notcutt W, Collin C.<br>J Neurol. 2013<br>260(1):285-95. doi: 10.1007/s00415-012-6634-z.                                                                                                                                                                                                                                                                                       | Pubmed<br>Scopus<br>Web of Science | Discard<br>Reasons:<br>Not of interest |
| 631. | Sativex(®) and clinical-neurophysiological measures of spasticity in progressive multiple sclerosis.<br>Leocani L, Nuara A, Houdayer E, Schiavetti I, Del Carro U, Amadio S, Straffi L, Rossi P, Martinelli V, Vila C, Sormani MP, Comi G<br>Journal of Neurology 2015<br>262(11): 2520-2527 doi: 10.1007/s00415-015-7878-1                                                                                                                                                                    | Pubmed<br>Scopus<br>Web of Science | Discard<br>Reasons:<br>Not of interest |
| 632. | Sativex(®) (tetrahydrocannabinol + cannabidiol), an endocannabinoid system modulator: basic features and main clinical data<br>Vermersch P.<br>Expert Rev Neurother. 2011<br>11(4 Suppl):15-9. Review doi: 10.1586/ern.11.27                                                                                                                                                                                                                                                                   | Pubmed<br>Scopus                   | Discard<br>Reasons:<br>Not of interest |



|      |                                                                                                                                                                                                                                                                                                                                                                                                                                                                                                   |                                    |                                        |
|------|---------------------------------------------------------------------------------------------------------------------------------------------------------------------------------------------------------------------------------------------------------------------------------------------------------------------------------------------------------------------------------------------------------------------------------------------------------------------------------------------------|------------------------------------|----------------------------------------|
| 633. | Sativex: clinical efficacy and tolerability in the treatment of symptoms of multiple sclerosis and neuropathic pain<br>Barnes MP.<br>Expert Opin Pharmacother. 2006<br>7(5):607-15. Review doi: 10.1517/14656566.7.5.607                                                                                                                                                                                                                                                                          | Pubmed<br>Scopus<br>Web of Science | Discard<br>Reasons:<br>Not of interest |
| 634. | Sativex® effects on promoter methylation and on CNR1/CNR2 expression in peripheral blood mononuclear cells of progressive multiple sclerosis patients<br>Santoro M, Mirabella M, De Fino C, Bianco A, Lucchini M, Losavio F, Sabino A, Nociti V<br>Journal of the Neurological Sciences 2017<br>379(298):303 doi:10.1016/j.jns.2017.06.017                                                                                                                                                        | Pubmed<br>Scopus                   | Keep                                   |
| 635. | Sativex-induced neurobehavioral effects: causal or concausal? A practical advice!<br>Russo M, Rifici C, Sessa E, D'Aleo G, Bramanti P, CalabrÃ² RS.<br>Daru. 2015<br>23:25. doi: 10.1186/s40199-015-0109-6                                                                                                                                                                                                                                                                                        | Pubmed<br>Scopus<br>Web of Science | Discard<br>Reasons:<br>Not of interest |
| 636. | Schmerzinderung durch Cannabinoide? Bedeutung des Endocannabinoidsystems und der Cannabinoide für die Schmerztherapie<br>Karst M, Bernateck M<br>Anesthesiologie Intensivmedizin Notfallmedizin Schmerztherapie 2008<br>43:522-528 doi:10.1055/s-0028-1083094                                                                                                                                                                                                                                     | Pubmed<br>Scopus                   | Discard<br>Reasons:<br>Not of interest |
| 637. | Scientific Opinion on the risks for human health related to the presence of tetrahydrocannabinol (THC) in milk and other food of animal origin. Benford D, Ceccatelli S, Cottrill B, DiNovi M, Dogliotti E, Edler L, Farmer P, Furst P, Hoogenboom L, Knutsen HK, Lundebye AK, Metzler M, Mutti A, Nebbia CS, O'Keeffe M, Petersen A, Rietjens I, Schrenk D, Silano V, van Loveren H, Vleminckx C, Wester P<br>EFSA JOURNAL 2015<br>13(6) Article Number: UNSP 4141 doi: 10.2903/j.efsa.2015.4141 | Web of Science                     | Discard<br>Reasons:<br>Not of interest |
| 638. | Selective Cannabinoids for Chronic Neuropathic Pain: A Systematic Review and Meta-analysis.<br>Meng H, Johnston B, Englesakis M, Moulin DE, Bhatia A<br>ANESTHESIA AND ANALGESIA 2017<br>125(5): 1638-1652 doi: 10.1213/ANE.0000000000002110                                                                                                                                                                                                                                                      | Web of Science                     | Discard<br>Reasons:<br>Not of interest |
| 639. | Short-Term Efficacy of CBD-Enriched Hemp Oil in Girls with Dysautonomic Syndrome after Human Papillomavirus Vaccination<br>Palmieri B, Laurino C, VadalÃ M.<br>Isr Med Assoc J. 2017<br>19(2):79-84                                                                                                                                                                                                                                                                                               | Pubmed<br>Scopus<br>Web of Science | Discard<br>Reasons:<br>Not of interest |

|      |                                                                                                                                                                                                                                                                                                                                                                                         |                                    |                                        |
|------|-----------------------------------------------------------------------------------------------------------------------------------------------------------------------------------------------------------------------------------------------------------------------------------------------------------------------------------------------------------------------------------------|------------------------------------|----------------------------------------|
| 640. | Should cannabis be prescribed on the NHS?<br>Layward L<br>Pharmaceutical Journal 1996<br>256(6885):457                                                                                                                                                                                                                                                                                  | Scopus                             | Discard<br>Reasons:<br>Not of interest |
| 641. | Should doctors prescribe cannabinoids?<br>Farrell M, Buchbinder R, Hall W<br>BMJ (Online) 2014<br>48:g2737 doi:10.1136/bmj.g2737                                                                                                                                                                                                                                                        | Scopus<br>Web of Science           | Discard<br>Reasons:<br>Not of interest |
| 642. | Should patient groups be more transparent about their funding?<br>Arie S, Mahony C.<br>BMJ. 2014<br>349:g5892. doi: 10.1136/bmj.g5892. No abstract available                                                                                                                                                                                                                            | Pubmed<br>Scopus                   | Discard<br>Reasons:<br>Not of interest |
| 643. | Should we care about sativex-induced neurobehavioral effects? A 6-month follow-up study<br>Russo M, De Luca R, Torrisi M, Rifichi C, Sessa E, Bramanti P, Naro A, CalabrÃ² RS.<br>Eur Rev Med Pharmacol Sci. 2016<br>20(14):3127-33                                                                                                                                                     | Pubmed<br>Scopus                   | Discard<br>Reasons:<br>Not of interest |
| 644. | Source of cannabinoids: what is available, what is used, and where does it come from?<br>Specchio N, Pietrafusa N, Cross HJ.<br>Epileptic Disord. 2020<br>22 (S1): S1-S9 doi: 10.1684/epd.2019.1121                                                                                                                                                                                     | Pubmed<br>Scopus<br>Web of Science | Discard<br>Reasons:<br>Not of interest |
| 645. | Special Considerations and Assessment in Patients with Multiple Sclerosis<br>Maitin IB, Cruz E.<br>Phys Med Rehabil Clin N Am. 2018<br>29(3):473-481. doi: 10.1016/j.pmr.2018.03.003.                                                                                                                                                                                                   | Pubmed<br>Scopus<br>Web of Science | Discard<br>Reasons:<br>Not of interest |
| 646. | Splendor in the Grass? A Pilot Study Assessing the Impact of Medical Marijuana on Executive Function.<br>Gruber SA, Sagar KA, Dahlgren MK, Racine MT, Smith RT, Lukas SE<br>FRONTIERS IN PHARMACOLOGY 2016<br>7 Article Number: 355 doi: 10.3389/fphar.201E00355                                                                                                                        | Web of Science                     | Discard<br>Reasons:<br>Not of interest |
| 647. | Summary of evidence-based guideline: complementary and alternative medicine in multiple sclerosis: report of the guideline development subcommittee of the American Academy of Neurology<br>Yadav V, Bever C Jr, Bowen J, Bowling A, Weinstock-Guttman B, Cameron M, Bourdette D, Gronseth GS, Narayanaswami P.<br>Neurology. 2014<br>82(12):1083-92. doi: 10.1212/WNL.0000000000000250 | Pubmed<br>Scopus<br>Web of Science | Discard<br>Reasons:<br>Not of interest |

|      |                                                                                                                                                                                                                                                                                                                                       |                                    |                                        |
|------|---------------------------------------------------------------------------------------------------------------------------------------------------------------------------------------------------------------------------------------------------------------------------------------------------------------------------------------|------------------------------------|----------------------------------------|
| 648. | Summary of Evidence-based Guideline: Complementary and Alternative Medicine in Multiple Sclerosis: Report of the Guideline Development Subcommittee of the American Academy of Neurology<br>Wright S<br>Neurology 2014<br>83(16): 1485-1486 doi: 10.1212/01.wnl.0000455935.13606.91                                                   | Scopus<br>Web of Science           | Discard<br>Reasons:<br>Not of interest |
| 649. | Summary<br>Tomillero A, Moral MA<br>Methods and Findings in Experimental and Clinical Pharmacology 2010<br>32(2):133-147                                                                                                                                                                                                              | Scopus                             | Discard<br>Reasons:<br>Not of interest |
| 650. | Summary<br>Tomillero A, Moral MA<br>Methods and Findings in Experimental and Clinical Pharmacology 2010<br>32(5):331-388 doi:10.1358/mf.2010.32.5.1520420                                                                                                                                                                             | Scopus                             | Discard<br>Reasons:<br>Not of interest |
| 651. | Summary<br>Tomillero A, Moral MA<br>Methods and Findings in Experimental and Clinical Pharmacology 2010<br>32(4):247-288 doi:10.1358/mf.2010.32.4.1507200                                                                                                                                                                             | Scopus                             | Discard<br>Reasons:<br>Not of interest |
| 652. | Symptomatic therapy in multiple sclerosis: the role of cannabinoids in treating spasticity<br>Leussink VI, Husseini L, Warnke C, Broussalis E, Hartung HP, Kieseier BC.<br>Ther Adv Neurol Disord. 2012<br>5(5):255-66. doi: 10.1177/1756285612453972                                                                                 | Pubmed<br>Scopus<br>Web of Science | Discard<br>Reasons:<br>Not of interest |
| 653. | Symptomatic treatment of multiple sclerosis using cannabinoids: recent advances<br>Smith PF.<br>Expert Rev Neurother. 2007<br>7(9):1157-63. Review doi: 10.1586/14737175.7.9.1157                                                                                                                                                     | Pubmed<br>Scopus                   | Discard<br>Reasons:<br>Not of interest |
| 654. | Synthesis of (-)-Cannabimovone and Structural Reassignment of Anhydrocannabimovone through Gold(I)-Catalyzed Cycloisomerization.<br>Carreras J, Kirillova MS, Echavarren AM<br>ANGEWANDTE CHEMIE-INTERNATIONAL EDITION 2016<br>55(25): 7121-7125 doi: 10.1002/anie.201601834                                                          | Web of Science                     | Discard<br>Reasons:<br>Not of interest |
| 655. | Systematic Review of the Costs and Benefits of Prescribed Cannabis-Based Medicines for the Management of Chronic Illness: Lessons from Multiple Sclerosis<br>Herzog S, Shanahan M, Grimison P, Tran A, Wong N, Lintzeris N, Simes J, Stockler M, Morton RL.<br>Pharmacoeconomics. 2018<br>36(1):67-78. doi: 10.1007/s40273-017-0565-6 | Pubmed<br>Scopus<br>Web of Science | Discard<br>Reasons:<br>Not of interest |

|      |                                                                                                                                                                                                                                                                                                                                           |                                    |                                        |
|------|-------------------------------------------------------------------------------------------------------------------------------------------------------------------------------------------------------------------------------------------------------------------------------------------------------------------------------------------|------------------------------------|----------------------------------------|
| 656. | Systematic Review of the Use of Tetrahydrocannabinol and Cannabidiol as a Medicinal Alternative in Multiple Sclerosis<br>Arellano D, Díaz O, Soto Molina H, Escobar Juárez Y<br>Value in Health 2020<br>23:10 doi: 10.1016/j.jval.2020.04.054                                                                                             | Web of Science                     | Discard<br>Reasons:<br>Not of interest |
| 657. | Systematic review: efficacy and safety of medical marijuana in selected neurologic disorders: report of the Guideline Development Subcommittee of the American Academy of Neurology<br>Koppel BS, Brust JC, Fife T, Bronstein J, Youssof S, Gronseth G, Gloss D.<br>Neurology. 2014<br>82(17):1556-63. doi: 10.1212/WNL.0000000000000363. | Pubmed<br>Scopus<br>Web of Science | Discard<br>Reasons:<br>Not of interest |
| 658. | Systemic Injections of Cannabidiol Enhance Acetylcholine Levels from Basal Forebrain in Rats.<br>Murillo-Rodriguez E, Arankowsky-Sandoval G, Rocha NB, Peniche-Amante R, Veras AB, Machado S, Budde H<br>NEUROCHEMICAL RESEARCH 2018<br>43(8): 1511-1518 DOI: 10.1007/s11064-018-2565-0                                                   | Web of Science                     | Discard<br>Reasons:<br>Not of interest |
| 659. | Taming the cannabinoids: New potential in the pharmacologic control of lower urinary tract dysfunction<br>Apostolidis A<br>European Urology 2012<br>61(1):107-109 doi 10.1016/j.eururo.2011.09.025                                                                                                                                        | Scopus                             | Discard<br>Reasons:<br>Not of interest |
| 660. | Target regulation of PI3K/Akt/mTOR pathway by cannabidiol in treatment of experimental multiple sclerosis<br>Giacoppo S, Pollastro F, Grassi G, Bramanti P, Mazzon E.<br>Fitoterapia. 2017<br>116:77-84. doi: 10.1016/j.fitote.2016.11.010.                                                                                               | Pubmed<br>Scopus<br>Web of Science | Keep                                   |
| 661. | Targeting Cannabinoid Signaling in the Immune System: "High"-ly Exciting Questions, Possibilities, and Challenges.<br>Olah A, Szekanecz Z, Biro T<br>FRONTIERS IN IMMUNOLOGY 2017<br>8 Article Number: 1487 DOI: 10.3389/fimmu.2017.01487                                                                                                 | Pubmed<br>Scopus<br>Web of Science | Discard<br>Reasons:<br>Not of interest |
| 662. | Targeting the CB2 receptor for immune modulation<br>Lunn CA, Reich EP, Bober L<br>Expert Opinion on Therapeutic Targets 2006<br>10(5):653-663 doi:10.1517/14728222.10.5.653                                                                                                                                                               | Scopus                             | Discard<br>Reasons:<br>Not of interest |
| 663. | Targeting the Endocannabinoid System in Psychiatric Illness                                                                                                                                                                                                                                                                               | Scopus                             | Discard                                |

|      |                                                                                                                                                                                                                                                                                                                                                               |                                    |                                        |
|------|---------------------------------------------------------------------------------------------------------------------------------------------------------------------------------------------------------------------------------------------------------------------------------------------------------------------------------------------------------------|------------------------------------|----------------------------------------|
|      | Katzman MA, Furtado M, Anand L<br>Journal of Clinical Psychopharmacology 2016,<br>36(6):691-703 doi:10.1097/JCP.0000000000000581                                                                                                                                                                                                                              | Web of Science                     | Reasons:<br>Not of interest            |
| 664. | Targeting the endocannabinoid system with cannabinoid receptor agonists: pharmacological strategies and therapeutic possibilities<br>Pertwee RG.<br>Philos Trans R Soc Lond B Biol Sci. 2012<br>367(1607):3353-63. doi: 10.1098/rstb.2011.0381. Review                                                                                                        | Pubmed<br>Scopus<br>Web of Science | Discard<br>Reasons:<br>Not of interest |
| 665. | Techniques and technologies for the bioanalysis of Sativex (R), metabolites and related compounds.<br>Molnar A, Fu SL<br>Bioanalysis 2016<br>8(8): 829-845 doi: 10.4155/bio-2015-0021                                                                                                                                                                         | Pubmed<br>Scopus<br>Web of Science | Discard<br>Reasons:<br>Not of interest |
| 666. | Tetrahydrocannabinol plus cannabidiol oromucosal spray for multiple sclerosis resistant spasticity on daily practice, new data.<br>Vermersch P, Trojano M<br>Multiple Sclerosis Journal 2016<br>Meeting Abstract: P757 Volume: 22 Pages: 377-377 Supplement: 3                                                                                                | Web of Science                     | Discard<br>Reasons:<br>Not of interest |
| 667. | Tetrahydrocannabinol/Cannabidiol Oromucosal Spray in Patients With Multiple Sclerosis: A Pilot Study on the Plasma Concentration-Effect Relationship<br>Contin M, Mancinelli L, Perrone A, Sabattini L, Mohamed S, Scandellari C, Foschi M, Vacchiano V, Lugaresi A, Riva R.<br>Clin Neuropharmacol. 2018<br>41(5):171-176. doi: 10.1097/WNF.0000000000000294 | Pubmed<br>Scopus<br>Web of Science | Discard<br>Reasons:<br>Not of interest |
| 668. | Tetrahydrocannabinol: Cannabidiol oromucosal spray for multiple sclerosis-related resistant spasticity in daily practice<br>Vermersch, P, Trojano M<br>European Neurology 2016<br>76(5-6):216-226 doi:10.1159/000449413                                                                                                                                       | Scopus<br>Web of Science           | Discard<br>Reasons:<br>Not of interest |
| 669. | Tetrahydrocannabinol: cannabidiol oromucosal spray for treating symptoms of multiple sclerosis spasticity: newest evidence<br>Ziemssen T.<br>Neurodegener Dis Manag. 2019<br>9(2s):1-2. doi: 10.2217/nmt-2018-0048.                                                                                                                                           | Pubmed<br>Scopus<br>Web of Science | Discard<br>Reasons:<br>Not of interest |
| 670. | THC and CBD oromucosal spray (Sativex ®) in the management of spasticity associated with multiple sclerosis.<br>Sastre-Garriga,J, Vila C, Clissold S, Montalban, X                                                                                                                                                                                            | Pubmed<br>Scopus<br>Web of Science | Discard<br>Reasons:<br>Not of interest |

|      |                                                                                                                                                                                                                                                                                                                                                                        |                                    |                                        |
|------|------------------------------------------------------------------------------------------------------------------------------------------------------------------------------------------------------------------------------------------------------------------------------------------------------------------------------------------------------------------------|------------------------------------|----------------------------------------|
|      | Expert Review of Neurotherapeutics 2011<br>11(5): 627-637 doi: 10.1586/ERN.11.47                                                                                                                                                                                                                                                                                       |                                    |                                        |
| 671. | Tetrahydrocannabinol and cannabidiol oromucosal spray in resistant multiple sclerosis spasticity: consistency of response across subgroups from the SAVANT randomized clinical trial<br>Meuth SG, Henze T, Essner U, Trompke C, Vila Silvã;n C.<br>Int J Neurosci. 2020<br>1-7. doi: 10.1080/00207454.2020.1730832                                                     | Pubmed<br>Scopus<br>Web of Science | Discard<br>Reasons:<br>Not of interest |
| 672. | THC/CBD oromucosal spray in patients with multiple sclerosis overactive bladder: a pilot prospective study<br>Maniscalco GT, Aponte R, Bruzzese D, Guarcello G, Manzo V, Napolitano M, Moreggia O, Chiariello F, Florio C.<br>Neurol Sci. 2018<br>39(1):97-102. doi: 10.1007/s10072-017-3148-6.                                                                        | Pubmed<br>Scopus<br>Web of Science | Discard<br>Reasons:<br>Not of interest |
| 673. | THC: CBD (Nabiximols) has a beneficial effect on multiple sclerosis related spasticity and delays the need for intrathecal Baclofen.<br>De Trane S, Buchanan K, Keenan L, Valentine C, Liddicut M, Stevenson V, Farrell R<br>JOURNAL OF NEUROLOGY NEUROSURGERY AND PSYCHIATRY 2017<br>Meeting Abstract: PO123 88: A44-A44 DOI: 10.1136/jnnp-2017-ABN.153 Supplement: 1 | Web of Science                     | Discard<br>Reasons:<br>Not of interest |
| 674. | THC: CBD spray and MS spasticity symptoms: Data from latest studies<br>Rekand T<br>European Neurology 2014<br>71(SUPPL.1):4-9-15 doi:10.1159/000357742                                                                                                                                                                                                                 | Pubmed<br>Scopus<br>Web of Science | Discard<br>Reasons:<br>Not of interest |
| 675. | THC:CBD in Daily Practice: Available Data from UK, Germany and Spain<br>Fernández Ó<br>Eur Neurol. 2016<br>75 Suppl 1:1-3. doi: 10.1159/000444234.                                                                                                                                                                                                                     | Pubmed<br>Scopus                   | Discard<br>Reasons:<br>Not of interest |
| 676. | THC:CBD Observational Study Data: Evolution of Resistant MS Spasticity and Associated Symptoms<br>Trojano M.<br>Eur Neurol. 2016<br>75 Suppl 1:4-8. doi: 10.1159/000444235.                                                                                                                                                                                            | Pubmed<br>Scopus                   | Discard<br>Reasons:<br>Not of interest |
| 677. | THC:CBD oromucosal spray (nabiximols) in the long term treatment of multiple sclerosis spasticity. The MOVE 2 long-term study.<br>Flachenecker P, Zettl U, Henze T<br>Multiple Sclerosis Journal 2013                                                                                                                                                                  | Web of Science                     | Discard<br>Reasons:<br>Not of interest |

|      |                                                                                                                                                                                                                                                                                                  |                                    |                                        |
|------|--------------------------------------------------------------------------------------------------------------------------------------------------------------------------------------------------------------------------------------------------------------------------------------------------|------------------------------------|----------------------------------------|
|      | 19(11): 527-527 Supplement: S                                                                                                                                                                                                                                                                    |                                    |                                        |
| 678. | The anti-inflammatory and analgesic effects of formulated full-spectrum cannabis extract in the treatment of neuropathic pain associated with multiple sclerosis<br>Maayah ZH, Takahara S, Ferdaoussi M, Dyck JRB.<br>Inflamm Res. 2020<br>69(6):549-558. doi: 10.1007/s00011-020-01341-1        | Pubmed<br>Scopus<br>Web of Science | Discard<br>Reasons:<br>Not of interest |
| 679. | The analgesic potential of cannabinoids<br>Elikottil J, Gupta P, Gupta K<br>Journal of Opioid Management 2009<br>5(6):341-357                                                                                                                                                                    | Scopus                             | Discard<br>Reasons:<br>Not of interest |
| 680. | The arguments for and against cannabinoids application in glaucomatous retinopathy.<br>Panah, Y, Manayi A, Nikan M, Vazirian M<br>BIOMEDICINE & PHARMACOTHERAPY 2017<br>86: 620-627 doi: 10.1016/j.biopha.2016.11.106                                                                            | Web of Science                     | Discard<br>Reasons:<br>Not of interest |
| 681. | The biology that underpins the therapeutic potential of cannabis-based medicines for the control of spasticity in multiple sclerosis<br>Multiple Sclerosis and Related Disorders 2012<br>1(2):64-75 doi:10.1016/j.msard.2011.11.001                                                              | Scopus                             | Discard<br>Reasons:<br>Not of interest |
| 682. | The Broad Concept of "Spasticity-Plus Syndrome" in Multiple Sclerosis: A Possible New Concept in the Management of Multiple Sclerosis Symptoms<br>Fernández Ó, Costa-Frossard L, Martínez-Ginès M, Montero P, Prieto JM, Ramiò L.<br>Front Neurol. 2020<br>11:152. doi: 10.3389/fneur.2020.00152 | Pubmed<br>Scopus<br>Web of Science | Discard<br>Reasons:<br>Not of interest |
| 683. | The cannabinergic system as a target for anti-inflammatory therapies<br>Lu D, Vemuri VK, Duclos Jr. RI, Makriyannis A<br>Current Topics in Medicinal Chemistry 2006<br>6(13):1401-1426 doi:10.1002/mop.21636                                                                                     | Scopus                             | Discard<br>Reasons:<br>Review          |
| 684. | The cannabinoids: an overview. Therapeutic implications in vomiting and nausea after cancer chemotherapy, in appetite promotion, in multiple sclerosis and in neuroprotection<br>Mechoulam R, Hanu L.<br>Pain Res Manag. 2001<br>6(2):67-73. Review doi: 10.1155/2001/183057                     | Pubmed<br>Scopus                   | Discard<br>Reasons:<br>Not of interest |
| 685. | The case for medicinal cannabis<br>Irish Journal of Medical Science 2018,<br>187(2):539-540 doi:10.1007/s11845-018-1770-9                                                                                                                                                                        | Scopus                             | Discard<br>Reasons:<br>Not of interest |
| 686. | The challenge of clinical application of FM2 cannabis oil produced in Italy for the treatment of neuropathic pain                                                                                                                                                                                | Scopus                             | Discard<br>Reasons:                    |

|      |                                                                                                                                                                                                                                                                                                                                                                                                                                      |                                    |                                        |
|------|--------------------------------------------------------------------------------------------------------------------------------------------------------------------------------------------------------------------------------------------------------------------------------------------------------------------------------------------------------------------------------------------------------------------------------------|------------------------------------|----------------------------------------|
|      | Pichini S, Pacifici R, Busardò FP, Tagliabracci A, Giorgetti R<br>European Review for Medical and Pharmacological Sciences 2018<br>22(4):863-865                                                                                                                                                                                                                                                                                     |                                    | Not of interest                        |
| 687. | The chromenopyrazole scaffold in the modulation of the endocannabinoid system: A broad therapeutic prospect<br>Morales P, Goya P, Jagerovic N<br>Anales de la Real Academia Nacional de Farmacia 2018<br>84(2):164-184                                                                                                                                                                                                               | Scopus                             | Discard<br>Reasons:<br>Not of interest |
| 688. | The current situation with cannabinoids<br>Kicman AT, King LA<br>Drug Testing and Analysis 2014<br>6(1-2):1-6 doi:10.1002/dta.1597                                                                                                                                                                                                                                                                                                   | Scopus                             | Discard<br>Reasons:<br>Not of interest |
| 689. | The detection of THC, CBD and CBN in the oral fluid of Sativex (R) patients using two on-site screening tests and LC-MS/MS<br>Molnar A, Fu SL, Lewis J, Allsop DJ, Copeland J<br>FORENSIC SCIENCE INTERNATIONAL 2014<br>238: 113-119 doi: 10.1016/j.forsciint.2014.03.004                                                                                                                                                            | Pubmed<br>Scopus<br>Web of Science | Discard<br>Reasons:<br>Not of interest |
| 690. | The disease-modifying effects of a Sativex-like combination of phytocannabinoids in mice with experimental autoimmune encephalomyelitis are preferentially due to $\Delta^9$ -tetrahydrocannabinol acting through CB1 receptors<br>Moreno-Martet M, Feliú A, Espejo-Porras F, Mecha M, Carrillo-Salinas FJ, Fernández-Ruiz J, Guaza C, de Lago E.<br>Mult Scler Relat Disord. 2015<br>4(6):505-11. doi: 10.1016/j.msard.2015.08.001. | Pubmed<br>Scopus<br>Web of Science | Keep                                   |
| 691. | The effect of cannabinoids on the stretch reflex in multiple sclerosis spasticity<br>Marinelli L, Mori L, Canneva S, Colombano F, Currà A, Fattapposta F, Bandini F, Capello E, Abbruzzese G, Trompetto C.<br>Int Clin Psychopharmacol. 2016<br>31(4):232-9. doi: 10.1097/YIC.000000000000126                                                                                                                                        | Pubmed<br>Scopus<br>Web of Science | Discard<br>Reasons:<br>Not of interest |
| 692. | The effect of cannabis on urge incontinence in patients with multiple sclerosis: a multicentre, randomised placebo-controlled trial (CAMS-LUTS)<br>Freeman RM, Adekanmi O, Waterfield MR, Waterfield AE, Wright D, Zajicek J.<br>Int Urogynecol J Pelvic Floor Dysfunct. 2006<br>17(6):636-41. doi: 10.1007/s00192-006-0086-x                                                                                                        | Pubmed<br>Scopus                   | Discard<br>Reasons:<br>Not of interest |
| 693. | The Effectiveness of Cannabinoids in the Management of Chronic Nonmalignant Neuropathic Pain: A Systematic Review.<br>Boychuk DG, Goddard G, Mauro G, Orellana MF                                                                                                                                                                                                                                                                    | Web of Science                     | Discard<br>Reasons:<br>Not of interest |



|      |                                                                                                                                                                                                                                                                                                                                  |                                    |                                        |
|------|----------------------------------------------------------------------------------------------------------------------------------------------------------------------------------------------------------------------------------------------------------------------------------------------------------------------------------|------------------------------------|----------------------------------------|
|      | Journal of Oral & Facial Pain and Headache 2015<br>29(1): 7-14 DOI: 10.11607/ofph.1274                                                                                                                                                                                                                                           |                                    |                                        |
| 694. | The effects of cannabis, cannabinoids, and their administration routes on pain control efficacy and safety: A systematic review and network meta-analysis<br>Rabgay K, Waranuch N, Chaiyakunapruk N, Sawangjit R, Ingkaninan K, Dilokthornsakul P<br>J Am Pharm Assoc. 2020<br>60(1):225-234.e6. doi: 10.1016/j.japh.2019.07.015 | Web of Science                     | Discard<br>Reasons:<br>Not of interest |
| 695. | The effects of chronic $\Delta$ -9-tetrahydrocannabinol (THC) and cannabidiol (CBD) use on cerebral glucose metabolism in multiple sclerosis: A pilot study<br>Workman CD, Kindred JH, Boles Ponto LL, Kamholz J, Rudroff T.<br>Appl Physiol Nutr Metab. 2020<br>45(4):450-452. doi: 10.1139/apnm-2019-0634                      | Pubmed<br>Scopus<br>Web of Science | Discard<br>Reasons:<br>Not of interest |
| 696. | The effects of clinical interventions on health-related quality of life in multiple sclerosis: A meta-analysis<br>Kuspinar A, Rodriguez AM, Mayo NE<br>Multiple Sclerosis Journal 2012<br>18(12):1686-1704 doi:10.1177/1352458512445201                                                                                          | Scopus                             | Discard<br>Reasons:<br>Not of interest |
| 697. | The Emerging Role of the Cannabinoid Receptor Family in Peripheral and Neuro-immune Interactions.<br>Haugh O, Penman J, Irving AJ, Campbell VA<br>Current Drug Targets 2016<br>17(16): 1834-1840 doi: 10.2174/1389450117666160112113703                                                                                          | Web of Science                     | Discard<br>Reasons:<br>Not of interest |
| 698. | The endocannabinoid pathway in Huntington's disease: A comparison with other neurodegenerative diseases<br>Maccarrone M, Battista N, Centonze D<br>Progress in Neurobiology 2007<br>81(5-6):349-379 doi:10.1016/j.pneurobio.2006.11.006                                                                                          | Scopus                             | Discard<br>Reasons:<br>Not of interest |
| 699. | The endocannabinoid system and its therapeutic exploitation in multiple sclerosis: Clues for other neuroinflammatory diseases<br>Chiurchiù V, van der Stelt M, Centonze D, Maccarrone M<br>Progress in Neurobiology 2018<br>160(82):100 doi:10.1016/j.pneurobio.2017.10.007                                                      | Scopus                             | Discard<br>Reasons:<br>Not of interest |
| 700. | The endocannabinoid system as a potential therapeutic target for pain modulation<br>Ulugöl A<br>Balkan Medical Journal 2014<br>31(2):115-120 doi:10.5152/balkanmedj.2014.13103                                                                                                                                                   | Scopus                             | Discard<br>Reasons:<br>Not of interest |

|      |                                                                                                                                                                                                                                                                                                                                  |                          |                                        |
|------|----------------------------------------------------------------------------------------------------------------------------------------------------------------------------------------------------------------------------------------------------------------------------------------------------------------------------------|--------------------------|----------------------------------------|
| 701. | The endocannabinoid system as a target for the treatment of neurodegenerative disease<br>Scotter EL, Abood ME, Glass M<br>British Journal of Pharmacology 2010<br>160(3):480-498 doi:10.1111/j.1476-5381.2010.00735.x                                                                                                            | Scopus                   | Discard<br>Reasons:<br>Not of interest |
| 702. | The endocannabinoid system as an emerging target of pharmacotherapy<br>Pacher P, Bátkai S, Kunos G<br>Pharmacological Reviews 2006<br>58(3):389-462 doi:10.1124/pr.58.3.2                                                                                                                                                        | Scopus                   | Discard<br>Reasons:<br>Not of interest |
| 703. | The endocannabinoid system in the inflammatory and neurodegenerative processes of multiple sclerosis and of amyotrophic lateral sclerosis<br>Rossi S, Bernardi G, Centonze D<br>Experimental Neurology 2010<br>224(1):92-102 doi:10.1016/j.expneurol.2010.03.030                                                                 | Scopus                   | Discard<br>Reasons:<br>Not of interest |
| 704. | The Endocannabinoid System: A Dynamic Signalling System at the Crossroads Between Metabolism and Disease<br>Witkamp RF<br>Pharma-Nutrition 2014<br>155-187 doi; 10.1007/978-3-319-06151-1_9                                                                                                                                      | Scopus                   | Discard<br>Reasons:<br>Not of interest |
| 705. | The endocannabinoid system: A new player in the neurochemical control of vestibular function?<br>Smith PF, Ashton JC, Darlington CL<br>Audiology and Neurotology 2006<br>11(4):207-212 doi:10.1159/000092588                                                                                                                     | Scopus                   | Discard<br>Reasons:<br>Not of interest |
| 706. | The endocannabinoid system: A revolving plate in neuro-immune interaction in health and disease<br>Tanasescu R, Gran B, Constantinescu CS<br>Amino Acids 2013<br>45(1):95-112 doi:10.1007/s00726-012-1252-8                                                                                                                      | Scopus                   | Discard<br>Reasons:<br>Not of interest |
| 707. | The endocannabinoid system: Overview of an emerging multi-faceted therapeutic target<br>Chanda D, Neumann D, Glatz JFC<br>Prostaglandins Leukotrienes and Essential Fatty Acids 2019<br>140(51):56 doi:10.1016/j.plefa.2018.11.016                                                                                               | Scopus                   | Discard<br>Reasons:<br>Not of interest |
| 708. | The endogenous cannabinoid system. Therapeutic implications for neurologic and psychiatric disorders [Das endogene Cannabinoidsystem. Therapeutische Implikationen der Cannabinoide bei neurologisch-psychiatrischen Erkrankungen]<br>Schneider U, Seifert J, Karst M, Schlimme J, Cimander K, Müller-Vahl KR<br>Nervenarzt 2005 | Scopus<br>Web of Science | Discard<br>Reasons:<br>Not of interest |

|      |                                                                                                                                                                                                                                                                                                                                                                                                              |                                    |                                        |
|------|--------------------------------------------------------------------------------------------------------------------------------------------------------------------------------------------------------------------------------------------------------------------------------------------------------------------------------------------------------------------------------------------------------------|------------------------------------|----------------------------------------|
|      | 76(9):1062-1076 doi:10.1007/s00115-005-1888-7                                                                                                                                                                                                                                                                                                                                                                |                                    |                                        |
| 709. | The entourage effect of the phytocannabinoids<br>Sanchez-Ramos J<br>Annals of Neurology 2015<br>77(6):1083 doi:10.1002/ana.24402                                                                                                                                                                                                                                                                             | Scopus                             | Discard<br>Reasons:<br>Not of interest |
| 710. | The Impact of Cannabinoid Receptor 2 Deficiency on Neutrophil Recruitment and Inflammation<br>Hussain,MT, Greaves DR, Iqbal AJ<br>DNA and Cell Biology 2019<br>38(10): 1025-1029 doi: 10.1089/dna.2019.5024                                                                                                                                                                                                  | Web of Science                     | Discard<br>Reasons:<br>Not of interest |
| 711. | The impact of cannabis and cannabinoids for medical conditions on health-related quality of life: A systematic review and meta-analysis<br>Goldenberg M, Reid MW, IsHak WW, Danovitch, I<br>Drug and Alcohol Dependence 2017<br>174:80-90 doi:10.1016/j.drugalcdep.2016.12.030                                                                                                                               | Scopus<br>Web of Science           | Discard<br>Reasons:<br>Not of interest |
| 712. | The impact of drugs for multiple sclerosis on sleep<br>Lanza G, Ferri R, Bella R, Ferini-Strambi L<br>Multiple Sclerosis 2017<br>23(1):5-13 doi:10.1177/1352458516664034                                                                                                                                                                                                                                     | Scopus                             | Discard<br>Reasons:<br>Not of interest |
| 713. | The influence of physiotherapy intervention on patients with multiple sclerosis-related spasticity treated with nabiximols (THC:CBD oromucosal spray).<br>Grimaldi AE, De Giglio L, Haggiag S, Bianco A, Cortese A, Crisafulli SG, Monteleone F, Marfia G, Prosperini L, Galgani S, Mirabella M, Centonze D, Pozzilli C, Castelli L.<br>PLoS One. 2019<br>14(7):e0219670. doi: 10.1371/journal.pone.0219670. | Pubmed<br>Scopus<br>Web of Science | Discard<br>Reasons:<br>Not of interest |
| 714. | The influence of THC:CBD oromucosal spray on driving ability in patients with multiple sclerosis-related spasticity<br>Celius EG, Vila C.<br>Brain Behav. 2018<br>8(5):e00962. doi: 10.1002/brb3.962.                                                                                                                                                                                                        | Pubmed<br>Scopus<br>Web of Science | Discard<br>Reasons:<br>Not of interest |
| 715. | The medical letter®: On drugs and therapeutics<br>[No author name available]<br>Medical Letter on Drugs and Therapeutics 2010<br>52(1330):5-6                                                                                                                                                                                                                                                                | Scopus                             | Discard<br>Reasons:<br>Not of interest |
| 716. | The Medicinal Use of Cannabis and Cannabinoids-An International Cross-Sectional Survey on Administration Forms.<br>Hazekamp A, Ware MA, Muller-Vahl KR, Abrams D, Grotenhermen F (                                                                                                                                                                                                                           | Web of Science                     | Discard<br>Reasons:<br>Not of interest |

|      |                                                                                                                                                                                                                                                                                                                                |                                    |                                        |
|------|--------------------------------------------------------------------------------------------------------------------------------------------------------------------------------------------------------------------------------------------------------------------------------------------------------------------------------|------------------------------------|----------------------------------------|
|      | Journal of Psychoactive Drugs 2013<br>45(3): 199-210 doi: 10.1080/02791072.2013.805976                                                                                                                                                                                                                                         |                                    |                                        |
| 717. | The molecular mechanisms that underpin the biological benefits of full-spectrum cannabis extract in the treatment of neuropathic pain and inflammation.<br>Maayah ZH, Takahara S, Ferdaoussi M, Dyck JRB<br>Biochimica et Biophysica acta. Molecular Basis of Disease 2020<br>1866(7):165771 doi: 10.1016/j.bbadis.2020.165771 | Web of Science                     | Discard<br>Reasons:<br>Not of interest |
| 718. | The multiplicity of action of cannabinoids: Implications for treating neurodegeneration<br>Gowran A, Noonan J, Campbell, V.A<br>CNS Neuroscience and Therapeutics 2011<br>17(6):637-644 doi:10.1111/j.1755-5949.2010.00195.x                                                                                                   | Scopus                             | Discard<br>Reasons:<br>Not of interest |
| 719. | The non-psychoactive plant cannabinoid, cannabidiol affects cholesterol metabolism-related genes in microglial cells<br>Rimmerman N, Juknat A, Kozela E, Levy R, Bradshaw HB, Vogel Z.<br>Cell Mol Neurobiol. 2011<br>31(6):921-30. doi: 10.1007/s10571-011-9692-3.                                                            | Pubmed<br>Scopus<br>Web of Science | Discard<br>Reasons:<br>Not of interest |
| 720. | The path to the first FDA-approved cannabis-derived treatment and what comes next<br>Rubin R<br>JAMA - Journal of the American Medical Association 2018<br>320(12):1227-1229 doi:10.1001/jama.2018.11914                                                                                                                       | Scopus                             | Discard<br>Reasons:<br>Not of interest |
| 721. | The Pharmacologic and Clinical Effects of Medical Cannabis.<br>Borgelt LM, Franson KL, Nussbaum AM, Wang GS<br>PHARMACOTHERAPY 2013<br>33(2): 195-209 doi: 10.1002/phar.1187                                                                                                                                                   | Web of Science                     | Discard<br>Reasons:<br>Not of interest |
| 722. | The pharmacology of cannabinoid receptors and their ligands: An overview<br>Pertwee RG<br>International Journal of Obesity 2006<br>30:S13-S18 doi:10.1038/sj.ijo.0803272                                                                                                                                                       | Scopus                             | Discard<br>Reasons:<br>Not of interest |
| 723. | The profile of immune modulation by cannabidiol (CBD) involves deregulation of nuclear factor of activated T cells (NFAT).<br>Kaplan, BLF, Springs AEB, Kaminski NE<br>Biochemical Pharmacology 2008<br>76 (6) 726-737 doi: 10.1016/j.bcp.2008.06.022                                                                          | Web of Science                     | Discard<br>Reasons:<br>Not of interest |
| 724. | The role of cannabinoids to manage pain [El papel de los cannabinoides en el manejo del dolor<br>Covarrubias-Gómez A<br>Revista Mexicana de Anestesiología 2008                                                                                                                                                                | Scopus                             | Discard<br>Reasons:<br>Not of interest |

|      |                                                                                                                                                                                                                                                                                                                                              |                                    |                                        |
|------|----------------------------------------------------------------------------------------------------------------------------------------------------------------------------------------------------------------------------------------------------------------------------------------------------------------------------------------------|------------------------------------|----------------------------------------|
|      | 31(3):191-200                                                                                                                                                                                                                                                                                                                                |                                    |                                        |
| 725. | The role of macrophages in neuroinflammatory and neurodegenerative pathways of alzheimer's disease, amyotrophic lateral sclerosis, and multiple sclerosis: Pathogenetic cellular effectors and potential therapeutic targets<br>International Journal of Molecular Sciences 2018<br>19(3):831 doi:10.3390/ijms19030831                       | Scopus                             | Discard<br>Reasons:<br>Not of interest |
| 726. | The role of medicinal cannabis in clinical therapy: Pharmacists' perspectives<br>Isaac S, Saini B, Chaar BB<br>PLoS ONE 2016<br>11(5):e0155113 doi:10.1371/journal.pone.0155113                                                                                                                                                              | Scopus                             | Discard<br>Reasons:<br>Not of interest |
| 727. | The role of Sativex in robotic rehabilitation in individuals with multiple sclerosis: Rationale, study design, and methodology<br>Russo M, Dattola V, Logiudice AL, Ciurleo R, Sessa E, De Luca R, Bramanti P, Bramanti A, Naro A, Calabrò <sup>2</sup> RS.<br>Medicine (Baltimore). 2017<br>96(46):e8826. doi: 10.1097/MD.00000000000008826 | Pubmed<br>Scopus<br>Web of Science | Discard<br>Reasons:<br>Not of interest |
| 728. | The role of the endocannabinoid system in Alzheimer's disease: facts and hypotheses<br>Bisogno T, Di Marzo V.<br>Curr Pharm Des. 2008<br>14(23):2299-3305. Review doi: 10.2174/138161208785740027                                                                                                                                            | Pubmed<br>Scopus<br>Web of Science | Discard<br>Reasons:<br>Not of interest |
| 729. | The role of the endocannabinoid system in eating disorders: Pharmacological implications<br>Marco EM, Romero-Zerbo SY, Viveros MP, Bermudez-Silva F.J<br>Behavioural Pharmacology 2012<br>23(5-6):526-536 doi:10.1097/FBP.0b013e328356c3c9                                                                                                   | Scopus                             | Discard<br>Reasons:<br>Not of interest |
| 730. | The safety of cannabinoids for the treatment of multiple sclerosis<br>Smith PF<br>Expert Opinion on Drug Safety 2005<br>4(3):443-456 doi:10.1517/14740338.4.3.443                                                                                                                                                                            | Scopus                             | Discard<br>Reasons:<br>Not of interest |
| 731. | The spectrum of psychosis in multiple sclerosis: A clinical case series<br>Gilberthorpe TG, O'Connell KE, Carolan A, Silber E, Brex PA, Sibtain NA, David AS<br>Neuropsychiatric Disease and Treatment 2017<br>13:303-318 doi:10.2147/NDT.S116772                                                                                            | Scopus                             | Discard<br>Reasons:<br>Not of interest |
| 732. | The synthetic cannabinoid WIN 55,212-2 increases COX-2 expression and PGE2 release in murine brain-derived endothelial cells following Theiler's virus infection<br>Mestre L, Correa F, Docagne F, Clemente D, Guaza C<br>Biochemical Pharmacology 2006<br>72(7):869-880 doi:10.1016/j.bcp.2006.06.037                                       | Pubmed<br>Scopus<br>Web of Science | Discard<br>Reasons:<br>Not of interest |

|      |                                                                                                                                                                                                                                                                                                |                                    |                                        |
|------|------------------------------------------------------------------------------------------------------------------------------------------------------------------------------------------------------------------------------------------------------------------------------------------------|------------------------------------|----------------------------------------|
| 733. | The toxicology of cannabis and cannabis prohibition<br>Grotenhermen F<br>Chemistry and Biodiversity 2007<br>4(8):1744-1769 doi:10.1002/cbdv.200790151                                                                                                                                          | Scopus                             | Discard<br>Reasons:<br>Not of interest |
| 734. | The therapeutic potential of the cannabinoids in neuroprotection<br>Grundy RI<br>Expert Opinion on Investigational Drugs 2002<br>11(10):1365-1374 doi:10.1517/13543784.11.10.1365                                                                                                              | Scopus                             | Discard<br>Reasons:<br>Not of interest |
| 735. | The therapeutic use of cannabinoids: Forensic aspects<br>Indorato F, Liberto A, Ledda C, Romano G, Barbera N<br>Forensic Science International 2016<br>265:200-203 doi:10.1016/j.forsciint.2016.03.031                                                                                         | Pubmed<br>Scopus<br>Web of Science | Discard<br>Reasons:<br>Not of interest |
| 736. | The therapeutic value of cannabinoids in MS: Real or imaginary?<br>Killestein J, Polman C<br>Multiple Sclerosis 2004<br>10(4):339-340 doi:10.1191/1352458504ms1064ed                                                                                                                           | Scopus                             | Discard<br>Reasons:<br>Not of interest |
| 737. | The treatment of lower urinary tract symptoms in patients with multiple sclerosis: A systematic review<br>Tubaro A, Puccini F, De Nunzio C, Digesu GA, Elneil S, Gobbi C, Khullar, V<br>Current Urology Reports 2012<br>13(5):335-342 doi:10.1007/s11934-012-0266-9                            | Scopus                             | Discard<br>Reasons:<br>Not of interest |
| 738. | The use of cannabinoids for sleep: A critical review on clinical trials<br>Kuhathasan N, Dufort A, MacKillop J, Gottschalk R, Minuzzi L, Frey BN.<br>Exp Clin Psychopharmacol. 2019<br>27(4):383-401. doi: 10.1037/pha0000285.                                                                 | Pubmed<br>Scopus<br>Web of Science | Discard<br>Reasons:<br>Not of interest |
| 739. | The use of cannabinoids in multiple sclerosis<br>Teare L, Zajicek J<br>Expert Opinion on Investigational Drugs 2005<br>14(7):859-869 doi:10.1517/13543784.14.7.859                                                                                                                             | Pubmed<br>Scopus<br>Web of Science | Discard<br>Reasons:<br>Not of interest |
| 740. | The Use of Cannabis and Cannabinoids in Treating Symptoms of Multiple Sclerosis: a Systematic Review of Reviews<br>Nielsen S, Germanos R, Weier M, Pollard J, Degenhardt L, Hall W, Buckley N, Farrell M.<br>Curr Neurol Neurosci Rep. 2018<br>18(2):8. doi: 10.1007/s11910-018-0814-x. Review | Pubmed<br>Scopus<br>Web of Science | Discard<br>Reasons:<br>Not of interest |
| 741. | The Use of Medical Cannabis with Other Medications: A Review of Safety and Guidelines - An Update [Internet].                                                                                                                                                                                  | Pubmed                             | Discard<br>Reasons:                    |

|      |                                                                                                                                                                                                                                                                                                                                                        |                                    |                                        |
|------|--------------------------------------------------------------------------------------------------------------------------------------------------------------------------------------------------------------------------------------------------------------------------------------------------------------------------------------------------------|------------------------------------|----------------------------------------|
|      | MacDonald E, Adams A.<br>Ottawa (ON): Canadian Agency for Drugs and Technologies in Health 2019 "                                                                                                                                                                                                                                                      |                                    | Not of interest                        |
| 742. | The Void in Clinician Counseling of Cannabis Use<br>Calcaterra SL, Cunningham CO, Hopfer CJ.<br>J Gen Intern Med. 2020<br>35:1875–1878 doi:10.1007/s11606-019-05612-4                                                                                                                                                                                  | Pubmed<br>Scopus<br>Web of Science | Discard<br>Reasons:<br>Not of interest |
| 743. | The use of medical-grade cannabis in patients non-responders to Nabiximols<br>Saccà F, Pane C, Carotenuto A, Massarelli M, Lanzillo R, Florio EB, Brescia Morra V.<br>J Neurol Sci. 2016<br>368:349-51. doi: 10.1016/j.jns.2016.07.059.                                                                                                                | Pubmed<br>Scopus<br>Web of Science | Discard<br>Reasons:<br>Not of interest |
| 744. | The year's new drugs & biologics<br>Graul AI, Cruces E<br>Drugs of Today 2010,2011<br>47(1):27-51 doi:10.1358/dot.2011.47.1.1587820                                                                                                                                                                                                                    | Scopus                             | Discard<br>Reasons:<br>Not of interest |
| 745. | Therapeutic action of cannabidiol in a murine model of Multiple Sclerosis: Protective effects on oligodendrocyte progenitor cultures.<br>Miriam M, Paula I, Leyre M, Miriam H, Katie G, Carmen G<br>JOURNAL OF NEUROIMMUNOLOGY 2010<br>228(1-2) Special Issue: SI Pages: 203-203                                                                       | Web of Science                     | Discard<br>Reasons:<br>Not of interest |
| 746. | Therapeutic applications by cannabinoid action [Aplicaciones terapéuticas por acción de los cannabinoides]<br>Plancarte-Sánchez R, Mansilla-Olivares A, De los Reyes-Pacheco VA, Meneses-González F<br>Gaceta Medica de Mexico 2019<br>155(3):307-318 doi:10.24875/GMM.18004928                                                                        | Pubmed<br>Scopus<br>Web of Science | Discard<br>Reasons:<br>Not of interest |
| 747. | Therapeutic cannabinoids in multiple sclerosis: immunomodulation revisited<br>Constantinescu CS, Gershkovich P.<br>Eur J Neurol. 2018<br>25(7):905-906. doi: 10.1111/ene.13658.                                                                                                                                                                        | Pubmed<br>Scopus<br>Web of Science | Discard<br>Reasons:<br>Not of interest |
| 748. | Therapeutic impact of orally administered cannabinoid oil extracts in an experimental autoimmune encephalomyelitis animal model of multiple sclerosis<br>Zhou T, Ahmad TK, Alrushaid S, Pozdirca M, Ethans K, Intrater H, Le T, Buczynski F, Kong J, Namaka M.<br>Biochem Biophys Res Commun. 2019<br>516(2):373-380. doi: 10.1016/j.bbrc.2019.06.033. | Pubmed<br>Scopus<br>Web of Science | Keep                                   |
| 749. | Therapeutic potential of cannabinoid medicines<br>Robson PJ                                                                                                                                                                                                                                                                                            | Pubmed<br>Scopus                   | Discard<br>Reasons:                    |

|      |                                                                                                                                                                                                                                                                                           |                                    |                                        |
|------|-------------------------------------------------------------------------------------------------------------------------------------------------------------------------------------------------------------------------------------------------------------------------------------------|------------------------------------|----------------------------------------|
|      | Drug Testing and Analysis 2014<br>6(1-2):24-30 doi:10.1002/dta.1529                                                                                                                                                                                                                       | Web of Science                     | Not of interest                        |
| 750. | Therapeutic potential of cannabinoid-based drugs<br>Klein TW, Newton CA<br>Advances in Experimental Medicine and Biology 2007<br>601:395-413 doi:10.1007/978-0-387-72005-0_43                                                                                                             | Scopus                             | Discard<br>Reasons:<br>Not of interest |
| 751. | Therapeutic potential of cannabinoids in CNS disease<br>Croxford JL<br>CNS Drugs 2003<br>17(3):179-202 doi:10.2165/00023210-200317030-00004                                                                                                                                               | Pubmed<br>Scopus<br>Web of Science | Discard<br>Reasons:<br>Not of interest |
| 752. | Therapeutic potential of cannabis in pain medicine<br>Hosking RD, Zajicek JP<br>British Journal of Anaesthesia 2008<br>101(1):59-68 doi:10.1093/bja/aen119                                                                                                                                | Scopus                             | Discard<br>Reasons:<br>Not of interest |
| 753. | Therapeutic potential of cannabis-related drugs<br>Alexander SPH<br>Progress in Neuro-Psychopharmacology and Biological Psychiatry 2016<br>64:157-166 doi:10.1016/j.pnpbp.2015.07.001                                                                                                     | Scopus                             | Discard<br>Reasons:<br>Not of interest |
| 754. | Therapeutic potential of CB2 targeting in multiple sclerosis<br>Docagne F, Mestre L, Loría F, Hernangómez M, Correa F, Guaza C<br>Expert Opinion on Therapeutic Targets 2008<br>12(2):185-195 doi:10.1517/14728222.12.2.185                                                               | Scopus                             | Discard<br>Reasons:<br>Not of interest |
| 755. | Therapeutic potential of medicinal marijuana: An educational primer for health care professionals<br>Mouhamed Y, Vishnyakov A, Qorri B, Sambhi M, Frank SMS, Nowierski C, Lamba A, Bhatti U, Szewczuk MR<br>Drug, Healthcare and Patient Safety 2018<br>10:45-66 doi:10.2147/DHPS.S158592 | Scopus                             | Discard<br>Reasons:<br>Not of interest |
| 756. | Therapeutic potential of phytocannabinoids and synthetic derivatives affecting human endocannabinoid system<br>Peč J, Riedingerová E, Martin J, Kršková, Z, Dušek, J<br>Ceska a Slovenska Farmacie 2008<br>57(5):195-207                                                                  | Scopus                             | Discard<br>Reasons:<br>Not of interest |
| 757. | Therapeutic satisfaction and subjective effects of different strains of pharmaceutical-grade cannabis<br>Brunt TM, van Genugten M, Höner-Snoeken K, van de Velde MJ, Niesink RJ.<br>J Clin Psychopharmacol. 2014                                                                          | Pubmed<br>Scopus<br>Web of Science | Discard<br>Reasons:<br>Not of interest |



|      |                                                                                                                                                                                                                        |                  |                                        |
|------|------------------------------------------------------------------------------------------------------------------------------------------------------------------------------------------------------------------------|------------------|----------------------------------------|
|      | 34(3):344-9. doi: 10.1097/JCP.000000000000129                                                                                                                                                                          |                  |                                        |
| 758. | Therapeutic use of cannabinoids in neurology [Therapeutischer Einsatz von Cannabinoiden bei neurologischen Erkrankungen]<br>Schwenkreis P, Tegenthoff M<br>Schmerz 2003<br>17(5):367-373 doi:10.1007/s00482-003-0240-z | Scopus           | Discard<br>Reasons:<br>Not of interest |
| 759. | Therapeutic use of cannabis derivatives<br>Benyamina A, Reynaud M.<br>Rev Prat. 2014<br>64(2):165-8. French.                                                                                                           | Pubmed<br>Scopus | Discard<br>Reasons:<br>Not of interest |
| 760. | Therapeutic uses of cannabinoides [Uso terapéutico de los cannabinoides]<br>Duran Delmàs M, Capellà Hereu D<br>Adicciones 2004<br>16(2):143-152                                                                        | Scopus           | Discard<br>Reasons:<br>Not of interest |
| 761. | Therapeutic utility of cannabinoid receptor type 2 (CB2) selective agonists<br>Han S, Thatte J, Buzard DJ, Jones RM<br>Journal of Medicinal Chemistry 2013<br>56(21):8224-8256 doi:10.1021/jm4005626                   | Scopus           | Discard<br>Reasons:<br>Not of interest |
| 762. | There is evidence for the use of cannabinoids for symptomatic treatment of multiple sclerosis<br>Bazinski H, Jensen HB, Stenager E.<br>Ugeskr Laeger. 2015<br>177(20):956-60. Review. Danish.                          | Pubmed<br>Scopus | Discard<br>Reasons:<br>Not of interest |
| 763. | Toll-like receptor signalling as a cannabinoid target in Multiple Sclerosis<br>Fitzpatrick J-MK., Downer EJ<br>Neuropharmacology 2017<br>113:618.626 doi:10.1016/j.neuropharm.2016.04.009                              | Scopus           | Discard<br>Reasons:<br>Not of interest |
| 764. | Towards a better understanding of the cannabinoid-related orphan receptors GPR3, GPR6, and GPR12<br>Morales P, Isawi I, Reggio PH<br>Drug Metabolism Reviews 2018<br>50(1):74-93 doi:10.1080/03602532.2018.1428616     | Scopus           | Discard<br>Reasons:<br>Not of interest |
| 765. | Toxicological properties of Delta (9)-tetrahydrocannabinol and cannabidiol<br>Cerne K<br>Archives of Industrial Hygiene and Toxicology 2020<br>71(1):1-11 doi: 10.2478/aiht-2020-71-3301                               | Web of Science   | Discard<br>Reasons:<br>Not of interest |

|      |                                                                                                                                                                                                                                                                                                                                                                   |                                    |                                        |
|------|-------------------------------------------------------------------------------------------------------------------------------------------------------------------------------------------------------------------------------------------------------------------------------------------------------------------------------------------------------------------|------------------------------------|----------------------------------------|
| 766. | Traditional marijuana, high-potency cannabis and synthetic cannabinoids: increasing risk for psychosis<br>Murray RM, Quigley H, Quattrone D, Englund A, Di Forti M<br>World Psychiatry 2016<br>15(3):195-204 doi:10.1002/wps.20341                                                                                                                                | Scopus                             | Discard<br>Reasons:<br>Not of interest |
| 767. | Transdermal/transmucosal drug delivery: New technologies and outsourcing opportunities<br>Di Filippo P<br>Contract Pharma 2013<br>1-2                                                                                                                                                                                                                             | Scopus                             | Discard<br>Reasons:<br>Not of interest |
| 768. | Transparency of funding of patient groups is mandatory but is not enough<br>Colombo C, Mosconi P.<br>BMJ. 2014<br>349:g6301. doi: 10.1136/bmj.g6301. No abstract available.                                                                                                                                                                                       | Pubmed<br>Scopus                   | Discard<br>Reasons:<br>Not of interest |
| 769. | Treatment failure of intrathecal baclofen and supra-additive effect of nabiximols in multiple sclerosis-related spasticity: a case report<br>Stroet A, Trampe N, Chan A.<br>Ther Adv Neurol Disord. 2013<br>6(3):199-203. doi: 10.1177/1756285613475835                                                                                                           | Pubmed<br>Scopus<br>Web of Science | Discard<br>Reasons:<br>Not of interest |
| 770. | Treatment of gastrointestinal disorders: EGS-21<br>Mealy NE, Bayés M<br>Drugs of the Future 2005<br>30(6):608-609                                                                                                                                                                                                                                                 | Scopus                             | Discard<br>Reasons:<br>Not of interest |
| 771. | Treatment of Periodontal Ligament Stem Cells with MOR and CBD Promotes Cell Survival and Neuronal Differentiation via the PI3K/Akt/mTOR Pathway.<br>Cariccio VL, Scionti D, Raffa A, Iori R, Pollastro F, Diomede F, Bramanti P, Trubiani O, Mazzon E<br>International Journal of Molecular Sciences 2018<br>19(8) Article Number: 2341 DOI: 10.3390/ijms19082341 | Web of Science                     | Discard<br>Reasons:<br>Not of interest |
| 772. | Treatment of spasticity in multiple sclerosis: new perspectives regarding the use of cannabinoids<br>Oreja-Guevara C.<br>Rev Neurol. 2012<br>55(7):421-30. Review. Spanish. doi: 10.33588/rn.5507.2012362                                                                                                                                                         | Pubmed<br>Scopus<br>Web of Science | Discard<br>Reasons:<br>Not of interest |
| 773. | Treatment of symptoms in multiple sclerosis<br>Schwendimann RN<br>Neurological Research 2006<br>28(3):306-315 doi:10.1179/016164106X98206                                                                                                                                                                                                                         | Scopus                             | Discard<br>Reasons:<br>Not of interest |

|      |                                                                                                                                                                                                                                                                                                                                                                               |                                    |                                        |
|------|-------------------------------------------------------------------------------------------------------------------------------------------------------------------------------------------------------------------------------------------------------------------------------------------------------------------------------------------------------------------------------|------------------------------------|----------------------------------------|
| 774. | Treatment with Nabiximols induces short-term and long-term transcriptional changes at peripheral level in patients with multiple sclerosis.<br>Boneschi FM, Ferre L, Sorosina M, Mascia E, Pavan G, Nuara A, Martinelli V, Clarelli F, Esposito F, Comi G<br>Multiple Sclerosis Journal Meeting Abstract: EP1287 Volume: 21 Pages: 672-673 Supplement: 11 Published: SEP 2015 | Web of Science                     | Discard<br>Reasons:<br>Not of interest |
| 775. | Trials a step forward for medicinal cannabis but what comes next?<br>Penington D<br>Australasian Biotechnology 2015<br>25(2):16-17                                                                                                                                                                                                                                            | Scopus                             | Discard<br>Reasons:<br>Not of interest |
| 776. | U.S. policy responses to calls for the medical use of Cannabis<br>Hall W<br>Yale Journal of Biology and Medicine 2015<br>88(3):257-264                                                                                                                                                                                                                                        | Scopus                             | Discard<br>Reasons:<br>Not of interest |
| 777. | Upper motor neuron evaluation in multiple sclerosis patients treated with Sativex(®).<br>Carotenuto A, Iodice R, Petracca M, Inglese M, Cerillo I, Coccozza S, Saiote C, Brunetti A, Tedeschi E, Manganelli F, Orefice G.<br>Acta Neurol Scand. 2017<br>135(4):442-448. doi: 10.1111/ane.12660                                                                                | Pubmed<br>Scopus                   | Discard<br>Reasons:<br>Not of interest |
| 778. | Use of Cannabinoids for Spasticity and Pain Management in MS<br>Chohan H, Greenfield AL, Yadav V, Graves J<br>Current Treatment Options in Neurology 2016<br>18(1):1-14 doi:10.1007/s11940-015-0385-y                                                                                                                                                                         | Pubmed<br>Scopus<br>Web of Science | Discard<br>Reasons:<br>Not of interest |
| 779. | Using cannabis in oncology: facts and myths<br>Küronya Z, Martin T, Kiss E, Szönyi M, Bíró K<br>Orv Hetil 2020<br>161(25):1035-1041 doi:10.1556/650.2020.31733                                                                                                                                                                                                                | Web of Science                     | Discard<br>Reasons:<br>Not of interest |
| 780. | Variability of Multiple Sclerosis Spasticity Symptoms in Response to THC:CBD Oromucosal Spray: Tracking Cases through Clinical Scales and Video Recordings<br>Flachenecker P, Saccà F, Vila C.", "Case Rep Neurol. 2018<br>10(2):169-176. doi: 10.1159/000490376.                                                                                                             | Pubmed<br>Scopus<br>Web of Science | Discard<br>Reasons:<br>Not of interest |
| 781. | Voiding function and dysfunction, bladder physiology and pharmacology, and female urology<br>Brady CM, DasGupta R, Dalton C, Wiseman OJ, Berkley KJ, Fowler CJ, Wein AJ, Ostaszkievicz J, Johnston L, Roe B, Wallace SA, Roe B, Williams K, Palmer M, Seif C, Jünemann KP, Braun PM., Goldberg RP, Tchetgen MB, Sand PK, Koduri S, Rackley R, Appell R, Culligan PJ           | Scopus                             | Discard<br>Reasons:<br>Not of interest |

|      |                                                                                                                                                                                                                                                                               |                                    |                                        |
|------|-------------------------------------------------------------------------------------------------------------------------------------------------------------------------------------------------------------------------------------------------------------------------------|------------------------------------|----------------------------------------|
|      | Journal of Urology 2005<br>173(49):1262-1266 doi:10.1097/01.ju.0000155014.15023.57                                                                                                                                                                                            |                                    |                                        |
| 782. | Walking improvements with nabiximols in patients with multiple sclerosis<br>Coghe G, Pau M, Corona F, Frau J, Lorefice L, Fenu G, Spinicci G, Mamusa E, Musu L, Massole S, Massa R, Marrosu MG, Cocco E.<br>J Neurol. 2015<br>262(11):2472-7. doi: 10.1007/s00415-015-7866-5. | Pubmed<br>Scopus<br>Web of Science | Discard<br>Reasons:<br>Not of interest |
| 783. | What is medicinal cannabis?<br>Glass M, Ashton JC<br>New Zealand Medical Journal 2019<br>132(1494):49-56                                                                                                                                                                      | Scopus                             | Discard<br>Reasons:<br>Not of interest |
| 784. | What is new in multiple sclerosis spasticity research? Poster session highlights<br>Ghezzi A.<br>Neurodegener Dis Manag.<br>6(6s):45-47.<br>Neurodegener Dis Manag. 2016 doi 10.2217/nmt-2016-0056:                                                                           | Pubmed<br>Scopus<br>Web of Science | Discard<br>Reasons:<br>Not of interest |
| 785. | What is new in symptomatic MS treatment: Part 2-gait disorder and spasticity.<br>Henze T, Feneberg W, Flachenecker P, Seidel D, Albrecht H, Starck M, Meuth SG<br>NERVENARZT 2017<br>88(12): 1428-1434 DOI: 10.1007/s00115-017-0439-3                                         | Web of Science                     | Discard<br>Reasons:<br>Not of interest |
| 786. | What place for ▼ cannabis extract in MS?<br>[No authors listed]<br>Drug and Therapeutics Bulletin 2012<br>50(12):141-144 doi:10.1136/dtb.2012.11.0150                                                                                                                         | Pubmed<br>Scopus                   | Discard<br>Reasons:<br>Not of interest |
| 787. | What regulation for therapeutic cannabis? [Quelle réglementation pour le cannabis thérapeutique?]<br>Michon F<br>Soins 2019<br>64:833 doi:10.1016/j.soins.2019.01.017                                                                                                         | Scopus                             | Discard<br>Reasons:<br>Not of interest |
| 788. | What to make of cannabis and cognition in MS: In search of clarity amidst the haze<br>Feinstein A, Banwell E, Pavisian B<br>Multiple Sclerosis 2015<br>21(14):1755-1760 doi:10.1177/1352458515607652                                                                          | Scopus                             | Discard<br>Reasons:<br>Not of interest |
| 789. | What's new in multiple sclerosis spasticity research? Poster session highlights<br>Linker R<br>Neurodegener Dis Manag.<br>7(6s):51-53. doi: 10.2217/nmt-2017-0043                                                                                                             | Pubmed<br>Scopus<br>Web of Science | Discard<br>Reasons:<br>Not of interest |

|      |                                                                                                                                                                                                                                                                        |                                    |                                         |
|------|------------------------------------------------------------------------------------------------------------------------------------------------------------------------------------------------------------------------------------------------------------------------|------------------------------------|-----------------------------------------|
| 790. | Who benefits most from THC:CBD spray? Learning from clinical experience<br>Koehler J.<br>Eur Neurol. 2014<br>71 Suppl 1:10-5. doi: 10.1159/000357743.                                                                                                                  | Pubmed<br>Scopus<br>Web of Science | Discard<br>Reasons:<br>Not of interest  |
| 791. | Who will support independent patient groups?<br>Batt S.<br>BMJ. 2014<br>349:g6306. doi: 10.1136/bmj.g6306                                                                                                                                                              | Pubmed<br>Scopus                   | Discard<br>Reasons:<br>Not of interest. |
| 792. | Whole plant cannabis extracts in the treatment of spasticity in multiple sclerosis: a systematic review<br>Lakhan SE, Rowland M.<br>BMC Neurol. 2009<br>9:59. doi: 10.1186/1471-2377-9-59                                                                              | Pubmed<br>Scopus<br>Web of Science | Discard<br>Reasons:<br>Not of interest  |
| 793. | Wider use of cannabinoids likely soon?<br>Jack DB<br>Drug News and Perspectives 1997<br>10(7):440-442                                                                                                                                                                  | Scopus                             | Discard<br>Reasons:<br>Not of interest  |
| 794. | Will medicinal cannabinoids prove to be useful clinically?<br>Smith PF<br>Current Drug Therapy 2007<br>2(2):143-150 doi:10.2174/157488507780619059                                                                                                                     | Scopus                             | Discard<br>Reasons:<br>Not of interest  |
| 795. | Willingness to pay for a treatment for pain in multiple sclerosis<br>Iskedjian M, Desjardins O, Piwko C, Bereza B, Jaszewski B, Einarson TR.<br>Pharmacoeconomics. 2009<br>27(2):149-58. doi: 10.2165/00019053-200927020-00005                                         | Pubmed<br>Scopus                   | Discard<br>Reasons:<br>Not of interest  |
| 796. | Yield and cannabinoids contents in different cannabis ( <i>Cannabis sativa</i> L.) genotypes for medical use<br>Janatová A, Fraňková A, Tlustoš P, Hamouz K, Božik M, Klouček P<br>Industrial Crops and Products 2018<br>112:363-367 doi:10.1016/j.indcrop.2017.12.006 | Sopus<br>Web of Science            | Discard<br>Reasons:<br>Not of interest  |

Note: “Not of interest” means that the reference **is not an original research which** does not deal with CBD and immune system/neuroinflammation in multiple sclerosis
